# Supplementary material for: Inferring Epitopes of a Polymorphic Antigen Amidst Broadly Cross-Reactive Antibodies Using Protein Microarrays: A Study of OspC Proteins of Borrelia burgdorferi
Source: PLoS One. 2013 Jun 24;8(6):e67445. doi: 10.1371/journal.pone.0067445 (PMC3691210; doi:10.1371/journal.pone.0067445)
Supplement: Table S2 — Individual serum sample information and pixel intensities for antibody binding to OspC proteins on the microarray. (XLS) [file pone.0067445.s006.xls]

## Sheet: Sheet1
Sample Namea	Sample Titleb	Speciesc	Infected or Controld	Lyme Disease Stagee	Used in Cross-Reactivity Analysisf	Infecting OspC Typeg	Prot Array OspC Typeh	Raw Pixel Intensityi	Log10j	Rankk	Binaryl
Sample_1	902111	Human	infected	Disseminated	Yes	unknown	A	275	2.44	25	1		a	Unique serum sample identifier for this study
Sample_2	902436	Human	infected	Late	Yes	unknown	A	46.5	1.67	5	0		b	Original serum sample identifier
Sample_3	902622	Human	infected	Disseminated	Yes	unknown	A	1395.5	3.14	46	1		c	Species of serum sample donor
Sample_4	902668	Human	infected	Disseminated	Yes	unknown	A	397	2.6	31	1		d	Infectious status of donor of serum sample
Sample_5	910531	Human	infected	Disseminated	Yes	unknown	A	157.5	2.2	21	0		e	For LD patient samples, stage of Lyme disease is provided. For P. leucopus, it is not applicable
Sample_6	910532	Human	infected	Late	Yes	unknown	A	87.5	1.94	10	0		f	Whether or not serum sample was included in calculations of cross-reactivity analysis
Sample_7	910533	Human	infected	Late	Yes	unknown	A	396	2.6	30	1		g	For P. leucopus serum samples, the ospC genotype of infecting strain is provided. For LD patient sera, it is unknown
Sample_8	910544	Human	infected	Late	Yes	unknown	A	2119.5	3.33	50	1		h	OspC type present on protein microarray spot
Sample_9	910794	Human	infected	Late	Yes	unknown	A	344.5	2.54	27	1		i	Raw pixel intensity of antibody binding to the OspC spot
Sample_10	910900	Human	infected	Disseminated	Yes	unknown	A	8244.5	3.92	52	1		j	Log10-transformed raw pixel intensity of antibody binding to the OspC spot
Sample_11	910943	Human	infected	Late	Yes	unknown	A	70.5	1.85	8	0		k	Rank transform of OspC spot for individual serum sample
Sample_12	911104	Human	infected	Disseminated	Yes	unknown	A	229	2.36	24	1		l	Binary transform of antibody binding to OspC spot
Sample_13	911347	Human	infected	Early	Yes	unknown	A	119.5	2.08	15	0
Sample_14	911348	Human	infected	Early	Yes	unknown	A	38183	4.58	55	1
Sample_15	911349	Human	infected	Early	Yes	unknown	A	1625.5	3.21	48	1
Sample_16	911350	Human	infected	Early	Yes	unknown	A	140.5	2.15	19	0
Sample_17	911351	Human	infected	Early	Yes	unknown	A	1718	3.24	49	1
Sample_18	911353	Human	infected	Early	Yes	unknown	A	132.5	2.12	18	0
Sample_19	911841	Human	infected	Early	Yes	unknown	A	15.5	1.19	2	0
Sample_20	911844	Human	infected	Early	Yes	unknown	A	1130.5	3.05	43	1
Sample_21	911847	Human	infected	Early	Yes	unknown	A	406	2.61	32	1
Sample_22	920057	Human	infected	Late	Yes	unknown	A	99	2	12	0
Sample_23	921982	Human	infected	Early	Yes	unknown	A	360.5	2.56	28	1
Sample_24	930206	Human	infected	Early	Yes	unknown	A	392.5	2.59	29	1
Sample_25	931414	Human	infected	Early	Yes	unknown	A	2641.5	3.42	51	1
Sample_26	940357	Human	infected	Disseminated	Yes	unknown	A	152.5	2.18	20	0
Sample_27	940880	Human	infected	Late	Yes	unknown	A	13415	4.13	53	1
Sample_28	Steere 12	Human	infected	Lyme Arthritis	Yes	unknown	A	316	2.5	26	1
Sample_29	Steere 13	Human	infected	Disseminated or Late	Yes	unknown	A	207	2.32	22	1
Sample_30	Steere 17	Human	infected	Disseminated or Late	Yes	unknown	A	125	2.1	17	0
Sample_31	Steere 18	Human	infected	Lyme Arthritis	Yes	unknown	A	459.5	2.66	34	1
Sample_32	Steere 20	Human	infected	Lyme Arthritis	Yes	unknown	A	1248.5	3.1	44	1
Sample_33	Steere 21	Human	infected	Disseminated or Late	Yes	unknown	A	578	2.76	36	1
Sample_34	Steere 22	Human	infected	Lyme Arthritis	Yes	unknown	A	64	1.81	7	0
Sample_35	Steere 24	Human	infected	Disseminated or Late	Yes	unknown	A	91.5	1.96	11	0
Sample_36	Steere 25	Human	infected	Lyme Arthritis	Yes	unknown	A	56.5	1.75	6	0
Sample_37	Steere 27	Human	infected	Lyme Arthritis	Yes	unknown	A	100.5	2	13	0
Sample_38	Steere 3	Human	infected	Lyme Arthritis	Yes	unknown	A	1126.5	3.05	42	1
Sample_39	Steere 30	Human	infected	Disseminated or Late	Yes	unknown	A	11	1.04	1	0
Sample_40	Steere 31	Human	infected	Lyme Arthritis	Yes	unknown	A	78.5	1.89	9	0
Sample_41	Steere 33	Human	infected	Disseminated or Late	Yes	unknown	A	30	1.48	4	0
Sample_42	Steere 35	Human	infected	Lyme Arthritis	Yes	unknown	A	524.5	2.72	35	1
Sample_43	Steere 37	Human	infected	Disseminated or Late	Yes	unknown	A	596	2.78	37	1
Sample_44	Steere 39	Human	infected	Lyme Arthritis	Yes	unknown	A	1099	3.04	41	1
Sample_45	Steere 41	Human	infected	Lyme Arthritis	Yes	unknown	A	210	2.32	23	1
Sample_46	Steere 42	Human	infected	Disseminated or Late	Yes	unknown	A	1283	3.11	45	1
Sample_47	Steere 43	Human	infected	Disseminated or Late	Yes	unknown	A	458	2.66	33	1
Sample_48	Steere 46	Human	infected	Lyme Arthritis	Yes	unknown	A	18	1.26	3	0
Sample_49	Steere 47	Human	infected	Lyme Arthritis	Yes	unknown	A	124.5	2.1	16	0
Sample_50	Steere 50	Human	infected	Lyme Arthritis	Yes	unknown	A	643	2.81	38	1
Sample_51	Steere 54	Human	infected	Lyme Arthritis	Yes	unknown	A	30162.5	4.48	54	1
Sample_52	Steere 57	Human	infected	Lyme Arthritis	Yes	unknown	A	684.5	2.84	39	1
Sample_53	Steere 58	Human	infected	Disseminated or Late	Yes	unknown	A	1460.5	3.16	47	1
Sample_54	Steere 6	Human	infected	Lyme Arthritis	Yes	unknown	A	882.5	2.95	40	1
Sample_55	Steere 8	Human	infected	Lyme Arthritis	Yes	unknown	A	112.5	2.05	14	0
Sample_56	900874	Human	control	none	No	none	A	56	1.75	N/A	N/A
Sample_57	900875	Human	control	none	No	none	A	44.5	1.65	N/A	N/A
Sample_58	900876	Human	control	none	No	none	A	39.5	1.6	N/A	N/A
Sample_59	900877	Human	control	none	No	none	A	66	1.82	N/A	N/A
Sample_60	900878	Human	control	none	No	none	A	181	2.26	N/A	N/A
Sample_61	Steere 10	Human	control	none	No	none	A	42	1.62	N/A	N/A
Sample_62	Steere 11	Human	control	none	No	none	A	35	1.54	N/A	N/A
Sample_63	Steere 14	Human	control	none	No	none	A	18	1.26	N/A	N/A
Sample_64	Steere 19	Human	control	none	No	none	A	1	0	N/A	N/A
Sample_65	Steere 2	Human	control	none	No	none	A	36	1.56	N/A	N/A
Sample_66	Steere 23	Human	control	none	No	none	A	44	1.64	N/A	N/A
Sample_67	Steere 28	Human	control	none	No	none	A	54	1.73	N/A	N/A
Sample_68	Steere 32	Human	control	none	No	none	A	1	0	N/A	N/A
Sample_69	Steere 34	Human	control	none	No	none	A	15	1.18	N/A	N/A
Sample_70	Steere 36	Human	control	none	No	none	A	18	1.26	N/A	N/A
Sample_71	Steere 38	Human	control	none	No	none	A	13.5	1.13	N/A	N/A
Sample_72	Steere 44	Human	control	none	No	none	A	17	1.23	N/A	N/A
Sample_73	Steere 45	Human	control	none	No	none	A	12.5	1.1	N/A	N/A
Sample_74	Steere 49	Human	control	none	No	none	A	150.5	2.18	N/A	N/A
Sample_75	Steere 5	Human	control	none	No	none	A	10.5	1.02	N/A	N/A
Sample_76	Steere 52	Human	control	none	No	none	A	87	1.94	N/A	N/A
Sample_77	Steere 53	Human	control	none	No	none	A	61.5	1.79	N/A	N/A
Sample_78	Steere 56	Human	control	none	No	none	A	38	1.58	N/A	N/A
Sample_79	Steere 59	Human	control	none	No	none	A	107	2.03	N/A	N/A
Sample_80	Steere 60	Human	control	none	No	none	A	185	2.27	N/A	N/A
Sample_81	27577 4	Peromyscus	infected	N/A	Yes	F	A	609	2.78	7	0
Sample_82	27577 5	Peromyscus	infected	N/A	Yes	F	A	461	2.66	3	0
Sample_83	HB19 1	Peromyscus	infected	N/A	Yes	I	A	9084.5	3.96	19	1
Sample_84	HB19 2	Peromyscus	infected	N/A	Yes	I	A	1	0	1	0
Sample_85	HB19 3	Peromyscus	infected	N/A	Yes	I	A	1409.5	3.15	11	1
Sample_86	HB19 4	Peromyscus	infected	N/A	Yes	I	A	2502.5	3.4	15	1
Sample_87	IDS 1	Peromyscus	infected	N/A	Yes	A and N	A	18871	4.28	21	1
Sample_88	IDS 2	Peromyscus	infected	N/A	Yes	A and N	A	41997	4.62	23	1
Sample_89	IDS 3	Peromyscus	infected	N/A	Yes	A and N	A	3948	3.6	17	1
Sample_90	IDS 4	Peromyscus	infected	N/A	Yes	A and N	A	19107	4.28	22	1
Sample_91	IDS 5	Peromyscus	infected	N/A	Yes	A and N	A	1990	3.3	13	1
Sample_92	SH2 1	Peromyscus	infected	N/A	Yes	K	A	680.25	2.83	8	0
Sample_93	SH2 3	Peromyscus	infected	N/A	Yes	K	A	10229.5	4.01	20	1
Sample_94	SH2 4	Peromyscus	infected	N/A	Yes	K	A	479	2.68	4	0
Sample_95	TBO2 1	Peromyscus	infected	N/A	Yes	N	A	1610	3.21	12	1
Sample_96	TBO2 2	Peromyscus	infected	N/A	Yes	N	A	576	2.76	6	0
Sample_97	TBO2 3	Peromyscus	infected	N/A	Yes	N	A	1100.5	3.04	10	0
Sample_98	TBO2 4	Peromyscus	infected	N/A	Yes	N	A	4164	3.62	18	1
Sample_99	TBO2 5	Peromyscus	infected	N/A	Yes	N	A	500	2.7	5	0
Sample_100	WQR 1	Peromyscus	infected	N/A	Yes	T	A	3220	3.51	16	1
Sample_101	WQR 2	Peromyscus	infected	N/A	Yes	T	A	2501	3.4	14	1
Sample_102	WQR 3	Peromyscus	infected	N/A	Yes	T	A	1085	3.04	9	0
Sample_103	WQR 5	Peromyscus	infected	N/A	Yes	T	A	251	2.4	2	0
Sample_104	NAIVE 1	Peromyscus	control	N/A	No	none	A	81.5	1.91	N/A	N/A
Sample_105	NAIVE 2	Peromyscus	control	N/A	No	none	A	1	0	N/A	N/A
Sample_106	NAIVE 3	Peromyscus	control	N/A	No	none	A	148.5	2.17	N/A	N/A
Sample_107	NAIVE 4	Peromyscus	control	N/A	No	none	A	182	2.26	N/A	N/A
Sample_108	NAIVE 5	Peromyscus	control	N/A	No	none	A	130	2.11	N/A	N/A
Sample_109	NAIVE 6	Peromyscus	control	N/A	No	none	A	18.5	1.27	N/A	N/A
Sample_110	NAIVE 7	Peromyscus	control	N/A	No	none	A	123.5	2.09	N/A	N/A
Sample_1	902111	Human	infected	Disseminated	Yes	unknown	A3	3102	3.49	51	1
Sample_2	902436	Human	infected	Late	Yes	unknown	A3	374	2.57	38	1
Sample_3	902622	Human	infected	Disseminated	Yes	unknown	A3	1188	3.07	50	1
Sample_4	902668	Human	infected	Disseminated	Yes	unknown	A3	74.5	1.87	12.5	0
Sample_5	910531	Human	infected	Disseminated	Yes	unknown	A3	72.5	1.86	11	0
Sample_6	910532	Human	infected	Late	Yes	unknown	A3	807.5	2.91	46	1
Sample_7	910533	Human	infected	Late	Yes	unknown	A3	262	2.42	31	1
Sample_8	910544	Human	infected	Late	Yes	unknown	A3	463	2.67	41	1
Sample_9	910794	Human	infected	Late	Yes	unknown	A3	368	2.57	37	1
Sample_10	910900	Human	infected	Disseminated	Yes	unknown	A3	5310.5	3.73	52	1
Sample_11	910943	Human	infected	Late	Yes	unknown	A3	24.5	1.39	1	0
Sample_12	911104	Human	infected	Disseminated	Yes	unknown	A3	162.5	2.21	26	0
Sample_13	911347	Human	infected	Early	Yes	unknown	A3	226.5	2.36	30	1
Sample_14	911348	Human	infected	Early	Yes	unknown	A3	9449.5	3.98	54	1
Sample_15	911349	Human	infected	Early	Yes	unknown	A3	418	2.62	39	1
Sample_16	911350	Human	infected	Early	Yes	unknown	A3	74.5	1.87	12.5	0
Sample_17	911351	Human	infected	Early	Yes	unknown	A3	1037	3.02	48	1
Sample_18	911353	Human	infected	Early	Yes	unknown	A3	31	1.49	4	0
Sample_19	911841	Human	infected	Early	Yes	unknown	A3	95.5	1.98	14	0
Sample_20	911844	Human	infected	Early	Yes	unknown	A3	117.5	2.07	19	0
Sample_21	911847	Human	infected	Early	Yes	unknown	A3	272	2.43	33	1
Sample_22	920057	Human	infected	Late	Yes	unknown	A3	664.5	2.82	45	1
Sample_23	921982	Human	infected	Early	Yes	unknown	A3	267	2.43	32	1
Sample_24	930206	Human	infected	Early	Yes	unknown	A3	182	2.26	28	1
Sample_25	931414	Human	infected	Early	Yes	unknown	A3	146.5	2.17	24	0
Sample_26	940357	Human	infected	Disseminated	Yes	unknown	A3	106	2.03	16	0
Sample_27	940880	Human	infected	Late	Yes	unknown	A3	10203.5	4.01	55	1
Sample_28	Steere 12	Human	infected	Lyme Arthritis	Yes	unknown	A3	107.5	2.03	17	0
Sample_29	Steere 13	Human	infected	Disseminated or Late	Yes	unknown	A3	288.5	2.46	34	1
Sample_30	Steere 17	Human	infected	Disseminated or Late	Yes	unknown	A3	71	1.85	10	0
Sample_31	Steere 18	Human	infected	Lyme Arthritis	Yes	unknown	A3	290.5	2.46	36	1
Sample_32	Steere 20	Human	infected	Lyme Arthritis	Yes	unknown	A3	66	1.82	9	0
Sample_33	Steere 21	Human	infected	Disseminated or Late	Yes	unknown	A3	125.5	2.1	20.5	0
Sample_34	Steere 22	Human	infected	Lyme Arthritis	Yes	unknown	A3	130	2.11	22	0
Sample_35	Steere 24	Human	infected	Disseminated or Late	Yes	unknown	A3	108.5	2.04	18	0
Sample_36	Steere 25	Human	infected	Lyme Arthritis	Yes	unknown	A3	27.5	1.44	2	0
Sample_37	Steere 27	Human	infected	Lyme Arthritis	Yes	unknown	A3	38.5	1.59	6	0
Sample_38	Steere 3	Human	infected	Lyme Arthritis	Yes	unknown	A3	30	1.48	3	0
Sample_39	Steere 30	Human	infected	Disseminated or Late	Yes	unknown	A3	65	1.81	8	0
Sample_40	Steere 31	Human	infected	Lyme Arthritis	Yes	unknown	A3	1085.5	3.04	49	1
Sample_41	Steere 33	Human	infected	Disseminated or Late	Yes	unknown	A3	98.5	1.99	15	0
Sample_42	Steere 35	Human	infected	Lyme Arthritis	Yes	unknown	A3	143.5	2.16	23	0
Sample_43	Steere 37	Human	infected	Disseminated or Late	Yes	unknown	A3	62	1.79	7	0
Sample_44	Steere 39	Human	infected	Lyme Arthritis	Yes	unknown	A3	290	2.46	35	1
Sample_45	Steere 41	Human	infected	Lyme Arthritis	Yes	unknown	A3	125.5	2.1	20.5	0
Sample_46	Steere 42	Human	infected	Disseminated or Late	Yes	unknown	A3	629.5	2.8	44	1
Sample_47	Steere 43	Human	infected	Disseminated or Late	Yes	unknown	A3	147.5	2.17	25	0
Sample_48	Steere 46	Human	infected	Lyme Arthritis	Yes	unknown	A3	32	1.51	5	0
Sample_49	Steere 47	Human	infected	Lyme Arthritis	Yes	unknown	A3	544	2.74	43	1
Sample_50	Steere 50	Human	infected	Lyme Arthritis	Yes	unknown	A3	191	2.28	29	1
Sample_51	Steere 54	Human	infected	Lyme Arthritis	Yes	unknown	A3	8183	3.91	53	1
Sample_52	Steere 57	Human	infected	Lyme Arthritis	Yes	unknown	A3	164	2.21	27	0
Sample_53	Steere 58	Human	infected	Disseminated or Late	Yes	unknown	A3	421.5	2.62	40	1
Sample_54	Steere 6	Human	infected	Lyme Arthritis	Yes	unknown	A3	466	2.67	42	1
Sample_55	Steere 8	Human	infected	Lyme Arthritis	Yes	unknown	A3	872.5	2.94	47	1
Sample_56	900874	Human	control	none	No	none	A3	70	1.85	N/A	N/A
Sample_57	900875	Human	control	none	No	none	A3	107.5	2.03	N/A	N/A
Sample_58	900876	Human	control	none	No	none	A3	25	1.4	N/A	N/A
Sample_59	900877	Human	control	none	No	none	A3	14.5	1.16	N/A	N/A
Sample_60	900878	Human	control	none	No	none	A3	529.5	2.72	N/A	N/A
Sample_61	Steere 10	Human	control	none	No	none	A3	15	1.18	N/A	N/A
Sample_62	Steere 11	Human	control	none	No	none	A3	12	1.08	N/A	N/A
Sample_63	Steere 14	Human	control	none	No	none	A3	54	1.73	N/A	N/A
Sample_64	Steere 19	Human	control	none	No	none	A3	1	0	N/A	N/A
Sample_65	Steere 2	Human	control	none	No	none	A3	24.5	1.39	N/A	N/A
Sample_66	Steere 23	Human	control	none	No	none	A3	474	2.68	N/A	N/A
Sample_67	Steere 28	Human	control	none	No	none	A3	66	1.82	N/A	N/A
Sample_68	Steere 32	Human	control	none	No	none	A3	254	2.4	N/A	N/A
Sample_69	Steere 34	Human	control	none	No	none	A3	7.5	0.88	N/A	N/A
Sample_70	Steere 36	Human	control	none	No	none	A3	14	1.15	N/A	N/A
Sample_71	Steere 38	Human	control	none	No	none	A3	67	1.83	N/A	N/A
Sample_72	Steere 44	Human	control	none	No	none	A3	17.5	1.24	N/A	N/A
Sample_73	Steere 45	Human	control	none	No	none	A3	6.5	0.81	N/A	N/A
Sample_74	Steere 49	Human	control	none	No	none	A3	53	1.72	N/A	N/A
Sample_75	Steere 5	Human	control	none	No	none	A3	31.5	1.5	N/A	N/A
Sample_76	Steere 52	Human	control	none	No	none	A3	34.5	1.54	N/A	N/A
Sample_77	Steere 53	Human	control	none	No	none	A3	3.5	0.54	N/A	N/A
Sample_78	Steere 56	Human	control	none	No	none	A3	22.5	1.35	N/A	N/A
Sample_79	Steere 59	Human	control	none	No	none	A3	41.5	1.62	N/A	N/A
Sample_80	Steere 60	Human	control	none	No	none	A3	62.5	1.8	N/A	N/A
Sample_81	27577 4	Peromyscus	infected	N/A	Yes	F	A3	309	2.49	12	0
Sample_82	27577 5	Peromyscus	infected	N/A	Yes	F	A3	240.5	2.38	9	0
Sample_83	HB19 1	Peromyscus	infected	N/A	Yes	I	A3	2980	3.47	21	1
Sample_84	HB19 2	Peromyscus	infected	N/A	Yes	I	A3	1	0	1.5	0
Sample_85	HB19 3	Peromyscus	infected	N/A	Yes	I	A3	59	1.77	4	0
Sample_86	HB19 4	Peromyscus	infected	N/A	Yes	I	A3	813	2.91	15	0
Sample_87	IDS 1	Peromyscus	infected	N/A	Yes	A and N	A3	1242.5	3.09	17	1
Sample_88	IDS 2	Peromyscus	infected	N/A	Yes	A and N	A3	12408.5	4.09	23	1
Sample_89	IDS 3	Peromyscus	infected	N/A	Yes	A and N	A3	1	0	1.5	0
Sample_90	IDS 4	Peromyscus	infected	N/A	Yes	A and N	A3	2976	3.47	20	1
Sample_91	IDS 5	Peromyscus	infected	N/A	Yes	A and N	A3	205.5	2.31	8	0
Sample_92	SH2 1	Peromyscus	infected	N/A	Yes	K	A3	64	1.81	5	0
Sample_93	SH2 3	Peromyscus	infected	N/A	Yes	K	A3	2680	3.43	19	1
Sample_94	SH2 4	Peromyscus	infected	N/A	Yes	K	A3	74.5	1.87	7	0
Sample_95	TBO2 1	Peromyscus	infected	N/A	Yes	N	A3	624	2.8	14	0
Sample_96	TBO2 2	Peromyscus	infected	N/A	Yes	N	A3	74	1.87	6	0
Sample_97	TBO2 3	Peromyscus	infected	N/A	Yes	N	A3	1103.5	3.04	16	0
Sample_98	TBO2 4	Peromyscus	infected	N/A	Yes	N	A3	3161.5	3.5	22	1
Sample_99	TBO2 5	Peromyscus	infected	N/A	Yes	N	A3	254.5	2.41	10	0
Sample_100	WQR 1	Peromyscus	infected	N/A	Yes	T	A3	317.5	2.5	13	0
Sample_101	WQR 2	Peromyscus	infected	N/A	Yes	T	A3	1475	3.17	18	1
Sample_102	WQR 3	Peromyscus	infected	N/A	Yes	T	A3	50	1.7	3	0
Sample_103	WQR 5	Peromyscus	infected	N/A	Yes	T	A3	265.5	2.42	11	0
Sample_104	NAIVE 1	Peromyscus	control	N/A	No	none	A3	1	0	N/A	N/A
Sample_105	NAIVE 2	Peromyscus	control	N/A	No	none	A3	4.5	0.65	N/A	N/A
Sample_106	NAIVE 3	Peromyscus	control	N/A	No	none	A3	52	1.72	N/A	N/A
Sample_107	NAIVE 4	Peromyscus	control	N/A	No	none	A3	60	1.78	N/A	N/A
Sample_108	NAIVE 5	Peromyscus	control	N/A	No	none	A3	29	1.46	N/A	N/A
Sample_109	NAIVE 6	Peromyscus	control	N/A	No	none	A3	1	0	N/A	N/A
Sample_110	NAIVE 7	Peromyscus	control	N/A	No	none	A3	1	0	N/A	N/A
Sample_1	902111	Human	infected	Disseminated	Yes	unknown	B	238	2.38	40	1
Sample_2	902436	Human	infected	Late	Yes	unknown	B	80.5	1.91	19	0
Sample_3	902622	Human	infected	Disseminated	Yes	unknown	B	218.5	2.34	38	1
Sample_4	902668	Human	infected	Disseminated	Yes	unknown	B	116.5	2.07	24	0
Sample_5	910531	Human	infected	Disseminated	Yes	unknown	B	313.5	2.5	42	1
Sample_6	910532	Human	infected	Late	Yes	unknown	B	63	1.8	15	0
Sample_7	910533	Human	infected	Late	Yes	unknown	B	121	2.08	25	0
Sample_8	910544	Human	infected	Late	Yes	unknown	B	333	2.52	43	1
Sample_9	910794	Human	infected	Late	Yes	unknown	B	53	1.72	14	0
Sample_10	910900	Human	infected	Disseminated	Yes	unknown	B	3517	3.55	52	1
Sample_11	910943	Human	infected	Late	Yes	unknown	B	84	1.92	21	0
Sample_12	911104	Human	infected	Disseminated	Yes	unknown	B	46.5	1.67	11	0
Sample_13	911347	Human	infected	Early	Yes	unknown	B	70	1.85	17	0
Sample_14	911348	Human	infected	Early	Yes	unknown	B	10538.5	4.02	54	1
Sample_15	911349	Human	infected	Early	Yes	unknown	B	194.5	2.29	33	1
Sample_16	911350	Human	infected	Early	Yes	unknown	B	49	1.69	13	0
Sample_17	911351	Human	infected	Early	Yes	unknown	B	1002.5	3	50	1
Sample_18	911353	Human	infected	Early	Yes	unknown	B	130	2.11	28	0
Sample_19	911841	Human	infected	Early	Yes	unknown	B	26.5	1.42	5	0
Sample_20	911844	Human	infected	Early	Yes	unknown	B	244	2.39	41	1
Sample_21	911847	Human	infected	Early	Yes	unknown	B	131.5	2.12	29	0
Sample_22	920057	Human	infected	Late	Yes	unknown	B	149.5	2.17	31	0
Sample_23	921982	Human	infected	Early	Yes	unknown	B	209	2.32	35	1
Sample_24	930206	Human	infected	Early	Yes	unknown	B	230.5	2.36	39	1
Sample_25	931414	Human	infected	Early	Yes	unknown	B	184.5	2.27	32	1
Sample_26	940357	Human	infected	Disseminated	Yes	unknown	B	149	2.17	30	0
Sample_27	940880	Human	infected	Late	Yes	unknown	B	5031	3.7	53	1
Sample_28	Steere 12	Human	infected	Lyme Arthritis	Yes	unknown	B	86.5	1.94	22	0
Sample_29	Steere 13	Human	infected	Disseminated or Late	Yes	unknown	B	25.5	1.41	4	0
Sample_30	Steere 17	Human	infected	Disseminated or Late	Yes	unknown	B	32	1.51	7	0
Sample_31	Steere 18	Human	infected	Lyme Arthritis	Yes	unknown	B	206	2.31	34	1
Sample_32	Steere 20	Human	infected	Lyme Arthritis	Yes	unknown	B	591.5	2.77	48	1
Sample_33	Steere 21	Human	infected	Disseminated or Late	Yes	unknown	B	67.5	1.83	16	0
Sample_34	Steere 22	Human	infected	Lyme Arthritis	Yes	unknown	B	82.5	1.92	20	0
Sample_35	Steere 24	Human	infected	Disseminated or Late	Yes	unknown	B	31.5	1.5	6	0
Sample_36	Steere 25	Human	infected	Lyme Arthritis	Yes	unknown	B	23.5	1.37	3	0
Sample_37	Steere 27	Human	infected	Lyme Arthritis	Yes	unknown	B	349.5	2.54	44	1
Sample_38	Steere 3	Human	infected	Lyme Arthritis	Yes	unknown	B	129.5	2.11	27	0
Sample_39	Steere 30	Human	infected	Disseminated or Late	Yes	unknown	B	20.5	1.31	2	0
Sample_40	Steere 31	Human	infected	Lyme Arthritis	Yes	unknown	B	34.5	1.54	8	0
Sample_41	Steere 33	Human	infected	Disseminated or Late	Yes	unknown	B	20	1.3	1	0
Sample_42	Steere 35	Human	infected	Lyme Arthritis	Yes	unknown	B	209.5	2.32	36	1
Sample_43	Steere 37	Human	infected	Disseminated or Late	Yes	unknown	B	47	1.67	12	0
Sample_44	Steere 39	Human	infected	Lyme Arthritis	Yes	unknown	B	1088.5	3.04	51	1
Sample_45	Steere 41	Human	infected	Lyme Arthritis	Yes	unknown	B	106	2.03	23	0
Sample_46	Steere 42	Human	infected	Disseminated or Late	Yes	unknown	B	704.5	2.85	49	1
Sample_47	Steere 43	Human	infected	Disseminated or Late	Yes	unknown	B	127	2.1	26	0
Sample_48	Steere 46	Human	infected	Lyme Arthritis	Yes	unknown	B	37.5	1.57	9	0
Sample_49	Steere 47	Human	infected	Lyme Arthritis	Yes	unknown	B	41	1.61	10	0
Sample_50	Steere 50	Human	infected	Lyme Arthritis	Yes	unknown	B	468	2.67	46	1
Sample_51	Steere 54	Human	infected	Lyme Arthritis	Yes	unknown	B	11292	4.05	55	1
Sample_52	Steere 57	Human	infected	Lyme Arthritis	Yes	unknown	B	532.5	2.73	47	1
Sample_53	Steere 58	Human	infected	Disseminated or Late	Yes	unknown	B	452	2.66	45	1
Sample_54	Steere 6	Human	infected	Lyme Arthritis	Yes	unknown	B	215	2.33	37	1
Sample_55	Steere 8	Human	infected	Lyme Arthritis	Yes	unknown	B	75	1.88	18	0
Sample_56	900874	Human	control	none	No	none	B	48.5	1.69	N/A	N/A
Sample_57	900875	Human	control	none	No	none	B	72.5	1.86	N/A	N/A
Sample_58	900876	Human	control	none	No	none	B	28	1.45	N/A	N/A
Sample_59	900877	Human	control	none	No	none	B	23	1.36	N/A	N/A
Sample_60	900878	Human	control	none	No	none	B	150	2.18	N/A	N/A
Sample_61	Steere 10	Human	control	none	No	none	B	46.5	1.67	N/A	N/A
Sample_62	Steere 11	Human	control	none	No	none	B	22	1.34	N/A	N/A
Sample_63	Steere 14	Human	control	none	No	none	B	30.5	1.48	N/A	N/A
Sample_64	Steere 19	Human	control	none	No	none	B	62	1.79	N/A	N/A
Sample_65	Steere 2	Human	control	none	No	none	B	50	1.7	N/A	N/A
Sample_66	Steere 23	Human	control	none	No	none	B	22	1.34	N/A	N/A
Sample_67	Steere 28	Human	control	none	No	none	B	342	2.53	N/A	N/A
Sample_68	Steere 32	Human	control	none	No	none	B	1	0	N/A	N/A
Sample_69	Steere 34	Human	control	none	No	none	B	15	1.18	N/A	N/A
Sample_70	Steere 36	Human	control	none	No	none	B	24	1.38	N/A	N/A
Sample_71	Steere 38	Human	control	none	No	none	B	32.5	1.51	N/A	N/A
Sample_72	Steere 44	Human	control	none	No	none	B	18	1.26	N/A	N/A
Sample_73	Steere 45	Human	control	none	No	none	B	10	1	N/A	N/A
Sample_74	Steere 49	Human	control	none	No	none	B	62.5	1.8	N/A	N/A
Sample_75	Steere 5	Human	control	none	No	none	B	29.5	1.47	N/A	N/A
Sample_76	Steere 52	Human	control	none	No	none	B	18.5	1.27	N/A	N/A
Sample_77	Steere 53	Human	control	none	No	none	B	5.5	0.74	N/A	N/A
Sample_78	Steere 56	Human	control	none	No	none	B	1	0	N/A	N/A
Sample_79	Steere 59	Human	control	none	No	none	B	93.5	1.97	N/A	N/A
Sample_80	Steere 60	Human	control	none	No	none	B	203.5	2.31	N/A	N/A
Sample_81	27577 4	Peromyscus	infected	N/A	Yes	F	B	242.5	2.38	3	0
Sample_82	27577 5	Peromyscus	infected	N/A	Yes	F	B	340.5	2.53	5	0
Sample_83	HB19 1	Peromyscus	infected	N/A	Yes	I	B	5709.5	3.76	19	1
Sample_84	HB19 2	Peromyscus	infected	N/A	Yes	I	B	3832	3.58	18	1
Sample_85	HB19 3	Peromyscus	infected	N/A	Yes	I	B	1032	3.01	11	0
Sample_86	HB19 4	Peromyscus	infected	N/A	Yes	I	B	1032.5	3.01	12.5	0
Sample_87	IDS 1	Peromyscus	infected	N/A	Yes	A and N	B	7346.5	3.87	23	1
Sample_88	IDS 2	Peromyscus	infected	N/A	Yes	A and N	B	6126	3.79	20	1
Sample_89	IDS 3	Peromyscus	infected	N/A	Yes	A and N	B	1936	3.29	16	1
Sample_90	IDS 4	Peromyscus	infected	N/A	Yes	A and N	B	6389	3.81	21	1
Sample_91	IDS 5	Peromyscus	infected	N/A	Yes	A and N	B	695	2.84	8	0
Sample_92	SH2 1	Peromyscus	infected	N/A	Yes	K	B	1032.5	3.01	12.5	0
Sample_93	SH2 3	Peromyscus	infected	N/A	Yes	K	B	6869	3.84	22	1
Sample_94	SH2 4	Peromyscus	infected	N/A	Yes	K	B	244	2.39	4	0
Sample_95	TBO2 1	Peromyscus	infected	N/A	Yes	N	B	772	2.89	9	0
Sample_96	TBO2 2	Peromyscus	infected	N/A	Yes	N	B	129.5	2.11	1	0
Sample_97	TBO2 3	Peromyscus	infected	N/A	Yes	N	B	773	2.89	10	0
Sample_98	TBO2 4	Peromyscus	infected	N/A	Yes	N	B	1926.5	3.28	15	1
Sample_99	TBO2 5	Peromyscus	infected	N/A	Yes	N	B	379	2.58	6	0
Sample_100	WQR 1	Peromyscus	infected	N/A	Yes	T	B	2041	3.31	17	1
Sample_101	WQR 2	Peromyscus	infected	N/A	Yes	T	B	1496.5	3.18	14	1
Sample_102	WQR 3	Peromyscus	infected	N/A	Yes	T	B	534	2.73	7	0
Sample_103	WQR 5	Peromyscus	infected	N/A	Yes	T	B	199	2.3	2	0
Sample_104	NAIVE 1	Peromyscus	control	N/A	No	none	B	82	1.91	N/A	N/A
Sample_105	NAIVE 2	Peromyscus	control	N/A	No	none	B	246	2.39	N/A	N/A
Sample_106	NAIVE 3	Peromyscus	control	N/A	No	none	B	86	1.93	N/A	N/A
Sample_107	NAIVE 4	Peromyscus	control	N/A	No	none	B	233.5	2.37	N/A	N/A
Sample_108	NAIVE 5	Peromyscus	control	N/A	No	none	B	1	0	N/A	N/A
Sample_109	NAIVE 6	Peromyscus	control	N/A	No	none	B	47	1.67	N/A	N/A
Sample_110	NAIVE 7	Peromyscus	control	N/A	No	none	B	6	0.78	N/A	N/A
Sample_1	902111	Human	infected	Disseminated	Yes	unknown	C	166.5	2.22	39	0
Sample_2	902436	Human	infected	Late	Yes	unknown	C	20	1.3	6	0
Sample_3	902622	Human	infected	Disseminated	Yes	unknown	C	41.5	1.62	12	0
Sample_4	902668	Human	infected	Disseminated	Yes	unknown	C	138	2.14	36	0
Sample_5	910531	Human	infected	Disseminated	Yes	unknown	C	261	2.42	43.5	1
Sample_6	910532	Human	infected	Late	Yes	unknown	C	49	1.69	16.5	0
Sample_7	910533	Human	infected	Late	Yes	unknown	C	72	1.86	23	0
Sample_8	910544	Human	infected	Late	Yes	unknown	C	200	2.3	42	1
Sample_9	910794	Human	infected	Late	Yes	unknown	C	191.5	2.28	41	1
Sample_10	910900	Human	infected	Disseminated	Yes	unknown	C	5408	3.73	53	1
Sample_11	910943	Human	infected	Late	Yes	unknown	C	102.5	2.01	29	0
Sample_12	911104	Human	infected	Disseminated	Yes	unknown	C	133.5	2.13	34	0
Sample_13	911347	Human	infected	Early	Yes	unknown	C	41	1.61	11	0
Sample_14	911348	Human	infected	Early	Yes	unknown	C	5607.5	3.75	54	1
Sample_15	911349	Human	infected	Early	Yes	unknown	C	91	1.96	26	0
Sample_16	911350	Human	infected	Early	Yes	unknown	C	338	2.53	47	1
Sample_17	911351	Human	infected	Early	Yes	unknown	C	366	2.56	48	1
Sample_18	911353	Human	infected	Early	Yes	unknown	C	61	1.79	21	0
Sample_19	911841	Human	infected	Early	Yes	unknown	C	7.5	0.88	4	0
Sample_20	911844	Human	infected	Early	Yes	unknown	C	73.5	1.87	24.5	0
Sample_21	911847	Human	infected	Early	Yes	unknown	C	118.5	2.07	32	0
Sample_22	920057	Human	infected	Late	Yes	unknown	C	9	0.95	5	0
Sample_23	921982	Human	infected	Early	Yes	unknown	C	93.5	1.97	27	0
Sample_24	930206	Human	infected	Early	Yes	unknown	C	157	2.2	38	0
Sample_25	931414	Human	infected	Early	Yes	unknown	C	274	2.44	45	1
Sample_26	940357	Human	infected	Disseminated	Yes	unknown	C	102	2.01	28	0
Sample_27	940880	Human	infected	Late	Yes	unknown	C	3808.5	3.58	52	1
Sample_28	Steere 12	Human	infected	Lyme Arthritis	Yes	unknown	C	129.5	2.11	33	0
Sample_29	Steere 13	Human	infected	Disseminated or Late	Yes	unknown	C	1	0	1.5	0
Sample_30	Steere 17	Human	infected	Disseminated or Late	Yes	unknown	C	46.5	1.67	14	0
Sample_31	Steere 18	Human	infected	Lyme Arthritis	Yes	unknown	C	636	2.8	49	1
Sample_32	Steere 20	Human	infected	Lyme Arthritis	Yes	unknown	C	114	2.06	31	0
Sample_33	Steere 21	Human	infected	Disseminated or Late	Yes	unknown	C	56.5	1.75	20	0
Sample_34	Steere 22	Human	infected	Lyme Arthritis	Yes	unknown	C	51	1.71	18	0
Sample_35	Steere 24	Human	infected	Disseminated or Late	Yes	unknown	C	38	1.58	10	0
Sample_36	Steere 25	Human	infected	Lyme Arthritis	Yes	unknown	C	49	1.69	16.5	0
Sample_37	Steere 27	Human	infected	Lyme Arthritis	Yes	unknown	C	42	1.62	13	0
Sample_38	Steere 3	Human	infected	Lyme Arthritis	Yes	unknown	C	73.5	1.87	24.5	0
Sample_39	Steere 30	Human	infected	Disseminated or Late	Yes	unknown	C	1	0	1.5	0
Sample_40	Steere 31	Human	infected	Lyme Arthritis	Yes	unknown	C	48	1.68	15	0
Sample_41	Steere 33	Human	infected	Disseminated or Late	Yes	unknown	C	65	1.81	22	0
Sample_42	Steere 35	Human	infected	Lyme Arthritis	Yes	unknown	C	190.5	2.28	40	1
Sample_43	Steere 37	Human	infected	Disseminated or Late	Yes	unknown	C	29.5	1.47	7	0
Sample_44	Steere 39	Human	infected	Lyme Arthritis	Yes	unknown	C	53	1.72	19	0
Sample_45	Steere 41	Human	infected	Lyme Arthritis	Yes	unknown	C	134	2.13	35	0
Sample_46	Steere 42	Human	infected	Disseminated or Late	Yes	unknown	C	308.5	2.49	46	1
Sample_47	Steere 43	Human	infected	Disseminated or Late	Yes	unknown	C	36	1.56	9	0
Sample_48	Steere 46	Human	infected	Lyme Arthritis	Yes	unknown	C	6.5	0.81	3	0
Sample_49	Steere 47	Human	infected	Lyme Arthritis	Yes	unknown	C	32	1.51	8	0
Sample_50	Steere 50	Human	infected	Lyme Arthritis	Yes	unknown	C	3624.5	3.56	51	1
Sample_51	Steere 54	Human	infected	Lyme Arthritis	Yes	unknown	C	10117	4.01	55	1
Sample_52	Steere 57	Human	infected	Lyme Arthritis	Yes	unknown	C	713.5	2.85	50	1
Sample_53	Steere 58	Human	infected	Disseminated or Late	Yes	unknown	C	261	2.42	43.5	1
Sample_54	Steere 6	Human	infected	Lyme Arthritis	Yes	unknown	C	153.5	2.19	37	0
Sample_55	Steere 8	Human	infected	Lyme Arthritis	Yes	unknown	C	109.5	2.04	30	0
Sample_56	900874	Human	control	none	No	none	C	66	1.82	N/A	N/A
Sample_57	900875	Human	control	none	No	none	C	53.5	1.73	N/A	N/A
Sample_58	900876	Human	control	none	No	none	C	46	1.66	N/A	N/A
Sample_59	900877	Human	control	none	No	none	C	54.5	1.74	N/A	N/A
Sample_60	900878	Human	control	none	No	none	C	88.5	1.95	N/A	N/A
Sample_61	Steere 10	Human	control	none	No	none	C	36.5	1.56	N/A	N/A
Sample_62	Steere 11	Human	control	none	No	none	C	28	1.45	N/A	N/A
Sample_63	Steere 14	Human	control	none	No	none	C	72.5	1.86	N/A	N/A
Sample_64	Steere 19	Human	control	none	No	none	C	1	0	N/A	N/A
Sample_65	Steere 2	Human	control	none	No	none	C	37	1.57	N/A	N/A
Sample_66	Steere 23	Human	control	none	No	none	C	66.5	1.82	N/A	N/A
Sample_67	Steere 28	Human	control	none	No	none	C	18	1.26	N/A	N/A
Sample_68	Steere 32	Human	control	none	No	none	C	1	0	N/A	N/A
Sample_69	Steere 34	Human	control	none	No	none	C	22	1.34	N/A	N/A
Sample_70	Steere 36	Human	control	none	No	none	C	34.5	1.54	N/A	N/A
Sample_71	Steere 38	Human	control	none	No	none	C	1	0	N/A	N/A
Sample_72	Steere 44	Human	control	none	No	none	C	1	0	N/A	N/A
Sample_73	Steere 45	Human	control	none	No	none	C	5	0.7	N/A	N/A
Sample_74	Steere 49	Human	control	none	No	none	C	88	1.94	N/A	N/A
Sample_75	Steere 5	Human	control	none	No	none	C	1	0	N/A	N/A
Sample_76	Steere 52	Human	control	none	No	none	C	50	1.7	N/A	N/A
Sample_77	Steere 53	Human	control	none	No	none	C	16.5	1.22	N/A	N/A
Sample_78	Steere 56	Human	control	none	No	none	C	13	1.11	N/A	N/A
Sample_79	Steere 59	Human	control	none	No	none	C	68	1.83	N/A	N/A
Sample_80	Steere 60	Human	control	none	No	none	C	151.5	2.18	N/A	N/A
Sample_81	27577 4	Peromyscus	infected	N/A	Yes	F	C	341.5	2.53	8	0
Sample_82	27577 5	Peromyscus	infected	N/A	Yes	F	C	200.5	2.3	4	0
Sample_83	HB19 1	Peromyscus	infected	N/A	Yes	I	C	3815.5	3.58	22	1
Sample_84	HB19 2	Peromyscus	infected	N/A	Yes	I	C	1	0	1	0
Sample_85	HB19 3	Peromyscus	infected	N/A	Yes	I	C	1193	3.08	19	1
Sample_86	HB19 4	Peromyscus	infected	N/A	Yes	I	C	679	2.83	14	0
Sample_87	IDS 1	Peromyscus	infected	N/A	Yes	A and N	C	846	2.93	15	0
Sample_88	IDS 2	Peromyscus	infected	N/A	Yes	A and N	C	543.5	2.74	12	0
Sample_89	IDS 3	Peromyscus	infected	N/A	Yes	A and N	C	663	2.82	13	0
Sample_90	IDS 4	Peromyscus	infected	N/A	Yes	A and N	C	1258.5	3.1	20	1
Sample_91	IDS 5	Peromyscus	infected	N/A	Yes	A and N	C	182	2.26	3	0
Sample_92	SH2 1	Peromyscus	infected	N/A	Yes	K	C	1788.75	3.25	21	1
Sample_93	SH2 3	Peromyscus	infected	N/A	Yes	K	C	4513.5	3.65	23	1
Sample_94	SH2 4	Peromyscus	infected	N/A	Yes	K	C	373	2.57	10	0
Sample_95	TBO2 1	Peromyscus	infected	N/A	Yes	N	C	258	2.41	6	0
Sample_96	TBO2 2	Peromyscus	infected	N/A	Yes	N	C	232.5	2.37	5	0
Sample_97	TBO2 3	Peromyscus	infected	N/A	Yes	N	C	1138.5	3.06	18	1
Sample_98	TBO2 4	Peromyscus	infected	N/A	Yes	N	C	991	3	16	0
Sample_99	TBO2 5	Peromyscus	infected	N/A	Yes	N	C	294.5	2.47	7	0
Sample_100	WQR 1	Peromyscus	infected	N/A	Yes	T	C	372.5	2.57	9	0
Sample_101	WQR 2	Peromyscus	infected	N/A	Yes	T	C	1116	3.05	17	0
Sample_102	WQR 3	Peromyscus	infected	N/A	Yes	T	C	107	2.03	2	0
Sample_103	WQR 5	Peromyscus	infected	N/A	Yes	T	C	431	2.63	11	0
Sample_104	NAIVE 1	Peromyscus	control	N/A	No	none	C	290	2.46	N/A	N/A
Sample_105	NAIVE 2	Peromyscus	control	N/A	No	none	C	44.5	1.65	N/A	N/A
Sample_106	NAIVE 3	Peromyscus	control	N/A	No	none	C	191	2.28	N/A	N/A
Sample_107	NAIVE 4	Peromyscus	control	N/A	No	none	C	354	2.55	N/A	N/A
Sample_108	NAIVE 5	Peromyscus	control	N/A	No	none	C	1	0	N/A	N/A
Sample_109	NAIVE 6	Peromyscus	control	N/A	No	none	C	29	1.46	N/A	N/A
Sample_110	NAIVE 7	Peromyscus	control	N/A	No	none	C	30	1.48	N/A	N/A
Sample_1	902111	Human	infected	Disseminated	Yes	unknown	C3	291	2.46	27	1
Sample_2	902436	Human	infected	Late	Yes	unknown	C3	197	2.29	20	1
Sample_3	902622	Human	infected	Disseminated	Yes	unknown	C3	3314	3.52	51	1
Sample_4	902668	Human	infected	Disseminated	Yes	unknown	C3	337	2.53	31	1
Sample_5	910531	Human	infected	Disseminated	Yes	unknown	C3	148	2.17	15	0
Sample_6	910532	Human	infected	Late	Yes	unknown	C3	55	1.74	3	0
Sample_7	910533	Human	infected	Late	Yes	unknown	C3	118	2.07	10.5	0
Sample_8	910544	Human	infected	Late	Yes	unknown	C3	840	2.92	41	1
Sample_9	910794	Human	infected	Late	Yes	unknown	C3	634	2.8	37	1
Sample_10	910900	Human	infected	Disseminated	Yes	unknown	C3	16592	4.22	53	1
Sample_11	910943	Human	infected	Late	Yes	unknown	C3	331	2.52	29	1
Sample_12	911104	Human	infected	Disseminated	Yes	unknown	C3	695	2.84	38	1
Sample_13	911347	Human	infected	Early	Yes	unknown	C3	270	2.43	23	1
Sample_14	911348	Human	infected	Early	Yes	unknown	C3	45061	4.65	55	1
Sample_15	911349	Human	infected	Early	Yes	unknown	C3	976	2.99	43	1
Sample_16	911350	Human	infected	Early	Yes	unknown	C3	468	2.67	32	1
Sample_17	911351	Human	infected	Early	Yes	unknown	C3	1659	3.22	47	1
Sample_18	911353	Human	infected	Early	Yes	unknown	C3	49	1.69	2	0
Sample_19	911841	Human	infected	Early	Yes	unknown	C3	75	1.88	6	0
Sample_20	911844	Human	infected	Early	Yes	unknown	C3	541	2.73	35	1
Sample_21	911847	Human	infected	Early	Yes	unknown	C3	334	2.52	30	1
Sample_22	920057	Human	infected	Late	Yes	unknown	C3	150	2.18	17	0
Sample_23	921982	Human	infected	Early	Yes	unknown	C3	596	2.78	36	1
Sample_24	930206	Human	infected	Early	Yes	unknown	C3	826	2.92	40	1
Sample_25	931414	Human	infected	Early	Yes	unknown	C3	1798	3.25	48	1
Sample_26	940357	Human	infected	Disseminated	Yes	unknown	C3	149	2.17	16	0
Sample_27	940880	Human	infected	Late	Yes	unknown	C3	23647	4.37	54	1
Sample_28	Steere 12	Human	infected	Lyme Arthritis	Yes	unknown	C3	850	2.93	42	1
Sample_29	Steere 13	Human	infected	Disseminated or Late	Yes	unknown	C3	90	1.95	8	0
Sample_30	Steere 17	Human	infected	Disseminated or Late	Yes	unknown	C3	215	2.33	21	1
Sample_31	Steere 18	Human	infected	Lyme Arthritis	Yes	unknown	C3	1264	3.1	44	1
Sample_32	Steere 20	Human	infected	Lyme Arthritis	Yes	unknown	C3	118	2.07	10.5	0
Sample_33	Steere 21	Human	infected	Disseminated or Late	Yes	unknown	C3	240	2.38	22	1
Sample_34	Steere 22	Human	infected	Lyme Arthritis	Yes	unknown	C3	65	1.81	4	0
Sample_35	Steere 24	Human	infected	Disseminated or Late	Yes	unknown	C3	283	2.45	24	1
Sample_36	Steere 25	Human	infected	Lyme Arthritis	Yes	unknown	C3	1865	3.27	49	1
Sample_37	Steere 27	Human	infected	Lyme Arthritis	Yes	unknown	C3	131	2.12	12	0
Sample_38	Steere 3	Human	infected	Lyme Arthritis	Yes	unknown	C3	141	2.15	14	0
Sample_39	Steere 30	Human	infected	Disseminated or Late	Yes	unknown	C3	92	1.96	9	0
Sample_40	Steere 31	Human	infected	Lyme Arthritis	Yes	unknown	C3	154	2.19	18	0
Sample_41	Steere 33	Human	infected	Disseminated or Late	Yes	unknown	C3	76	1.88	7	0
Sample_42	Steere 35	Human	infected	Lyme Arthritis	Yes	unknown	C3	295	2.47	28	1
Sample_43	Steere 37	Human	infected	Disseminated or Late	Yes	unknown	C3	66	1.82	5	0
Sample_44	Steere 39	Human	infected	Lyme Arthritis	Yes	unknown	C3	2702	3.43	50	1
Sample_45	Steere 41	Human	infected	Lyme Arthritis	Yes	unknown	C3	516	2.71	34	1
Sample_46	Steere 42	Human	infected	Disseminated or Late	Yes	unknown	C3	1634	3.21	46	1
Sample_47	Steere 43	Human	infected	Disseminated or Late	Yes	unknown	C3	481	2.68	33	1
Sample_48	Steere 46	Human	infected	Lyme Arthritis	Yes	unknown	C3	44	1.64	1	0
Sample_49	Steere 47	Human	infected	Lyme Arthritis	Yes	unknown	C3	171	2.23	19	0
Sample_50	Steere 50	Human	infected	Lyme Arthritis	Yes	unknown	C3	286	2.46	25	1
Sample_51	Steere 54	Human	infected	Lyme Arthritis	Yes	unknown	C3	5741	3.76	52	1
Sample_52	Steere 57	Human	infected	Lyme Arthritis	Yes	unknown	C3	140	2.15	13	0
Sample_53	Steere 58	Human	infected	Disseminated or Late	Yes	unknown	C3	1504	3.18	45	1
Sample_54	Steere 6	Human	infected	Lyme Arthritis	Yes	unknown	C3	783	2.89	39	1
Sample_55	Steere 8	Human	infected	Lyme Arthritis	Yes	unknown	C3	288	2.46	26	1
Sample_56	900874	Human	control	none	No	none	C3	55	1.74	N/A	N/A
Sample_57	900875	Human	control	none	No	none	C3	94	1.97	N/A	N/A
Sample_58	900876	Human	control	none	No	none	C3	36	1.56	N/A	N/A
Sample_59	900877	Human	control	none	No	none	C3	100	2	N/A	N/A
Sample_60	900878	Human	control	none	No	none	C3	137	2.14	N/A	N/A
Sample_61	Steere 10	Human	control	none	No	none	C3	50	1.7	N/A	N/A
Sample_62	Steere 11	Human	control	none	No	none	C3	112	2.05	N/A	N/A
Sample_63	Steere 14	Human	control	none	No	none	C3	16	1.2	N/A	N/A
Sample_64	Steere 19	Human	control	none	No	none	C3	278	2.44	N/A	N/A
Sample_65	Steere 2	Human	control	none	No	none	C3	67	1.83	N/A	N/A
Sample_66	Steere 23	Human	control	none	No	none	C3	80	1.9	N/A	N/A
Sample_67	Steere 28	Human	control	none	No	none	C3	82	1.91	N/A	N/A
Sample_68	Steere 32	Human	control	none	No	none	C3	88	1.94	N/A	N/A
Sample_69	Steere 34	Human	control	none	No	none	C3	25	1.4	N/A	N/A
Sample_70	Steere 36	Human	control	none	No	none	C3	51	1.71	N/A	N/A
Sample_71	Steere 38	Human	control	none	No	none	C3	39	1.59	N/A	N/A
Sample_72	Steere 44	Human	control	none	No	none	C3	156	2.19	N/A	N/A
Sample_73	Steere 45	Human	control	none	No	none	C3	30	1.48	N/A	N/A
Sample_74	Steere 49	Human	control	none	No	none	C3	40	1.6	N/A	N/A
Sample_75	Steere 5	Human	control	none	No	none	C3	31	1.49	N/A	N/A
Sample_76	Steere 52	Human	control	none	No	none	C3	59	1.77	N/A	N/A
Sample_77	Steere 53	Human	control	none	No	none	C3	19	1.28	N/A	N/A
Sample_78	Steere 56	Human	control	none	No	none	C3	18	1.26	N/A	N/A
Sample_79	Steere 59	Human	control	none	No	none	C3	32	1.51	N/A	N/A
Sample_80	Steere 60	Human	control	none	No	none	C3	38	1.58	N/A	N/A
Sample_81	27577 4	Peromyscus	infected	N/A	Yes	F	C3	846	2.93	6	0
Sample_82	27577 5	Peromyscus	infected	N/A	Yes	F	C3	826	2.92	5	0
Sample_83	HB19 1	Peromyscus	infected	N/A	Yes	I	C3	8910.5	3.95	19	1
Sample_84	HB19 2	Peromyscus	infected	N/A	Yes	I	C3	1500.5	3.18	9	1
Sample_85	HB19 3	Peromyscus	infected	N/A	Yes	I	C3	1811	3.26	13	1
Sample_86	HB19 4	Peromyscus	infected	N/A	Yes	I	C3	2632	3.42	14	1
Sample_87	IDS 1	Peromyscus	infected	N/A	Yes	A and N	C3	9496	3.98	20	1
Sample_88	IDS 2	Peromyscus	infected	N/A	Yes	A and N	C3	43686.5	4.64	23	1
Sample_89	IDS 3	Peromyscus	infected	N/A	Yes	A and N	C3	1577.5	3.2	12	1
Sample_90	IDS 4	Peromyscus	infected	N/A	Yes	A and N	C3	12519.5	4.1	22	1
Sample_91	IDS 5	Peromyscus	infected	N/A	Yes	A and N	C3	955	2.98	7	0
Sample_92	SH2 1	Peromyscus	infected	N/A	Yes	K	C3	318.25	2.5	2	0
Sample_93	SH2 3	Peromyscus	infected	N/A	Yes	K	C3	8131	3.91	18	1
Sample_94	SH2 4	Peromyscus	infected	N/A	Yes	K	C3	327.5	2.52	3	0
Sample_95	TBO2 1	Peromyscus	infected	N/A	Yes	N	C3	3471	3.54	16	1
Sample_96	TBO2 2	Peromyscus	infected	N/A	Yes	N	C3	1558	3.19	11	1
Sample_97	TBO2 3	Peromyscus	infected	N/A	Yes	N	C3	1554	3.19	10	1
Sample_98	TBO2 4	Peromyscus	infected	N/A	Yes	N	C3	12165	4.09	21	1
Sample_99	TBO2 5	Peromyscus	infected	N/A	Yes	N	C3	749.5	2.87	4	0
Sample_100	WQR 1	Peromyscus	infected	N/A	Yes	T	C3	2854	3.46	15	1
Sample_101	WQR 2	Peromyscus	infected	N/A	Yes	T	C3	5079	3.71	17	1
Sample_102	WQR 3	Peromyscus	infected	N/A	Yes	T	C3	1232	3.09	8	1
Sample_103	WQR 5	Peromyscus	infected	N/A	Yes	T	C3	265.5	2.42	1	0
Sample_104	NAIVE 1	Peromyscus	control	N/A	No	none	C3	379.5	2.58	N/A	N/A
Sample_105	NAIVE 2	Peromyscus	control	N/A	No	none	C3	123	2.09	N/A	N/A
Sample_106	NAIVE 3	Peromyscus	control	N/A	No	none	C3	95.5	1.98	N/A	N/A
Sample_107	NAIVE 4	Peromyscus	control	N/A	No	none	C3	233	2.37	N/A	N/A
Sample_108	NAIVE 5	Peromyscus	control	N/A	No	none	C3	151	2.18	N/A	N/A
Sample_109	NAIVE 6	Peromyscus	control	N/A	No	none	C3	24	1.38	N/A	N/A
Sample_110	NAIVE 7	Peromyscus	control	N/A	No	none	C3	1	0	N/A	N/A
Sample_1	902111	Human	infected	Disseminated	Yes	unknown	D	142.5	2.15	39	0
Sample_2	902436	Human	infected	Late	Yes	unknown	D	39.5	1.6	12	0
Sample_3	902622	Human	infected	Disseminated	Yes	unknown	D	587	2.77	50	1
Sample_4	902668	Human	infected	Disseminated	Yes	unknown	D	606	2.78	51	1
Sample_5	910531	Human	infected	Disseminated	Yes	unknown	D	274	2.44	46	1
Sample_6	910532	Human	infected	Late	Yes	unknown	D	65.5	1.82	25	0
Sample_7	910533	Human	infected	Late	Yes	unknown	D	44.5	1.65	17	0
Sample_8	910544	Human	infected	Late	Yes	unknown	D	144.5	2.16	40	0
Sample_9	910794	Human	infected	Late	Yes	unknown	D	123	2.09	36	0
Sample_10	910900	Human	infected	Disseminated	Yes	unknown	D	3589	3.55	54	1
Sample_11	910943	Human	infected	Late	Yes	unknown	D	60.5	1.78	21	0
Sample_12	911104	Human	infected	Disseminated	Yes	unknown	D	189	2.28	43	1
Sample_13	911347	Human	infected	Early	Yes	unknown	D	43	1.63	15.5	0
Sample_14	911348	Human	infected	Early	Yes	unknown	D	3319.5	3.52	53	1
Sample_15	911349	Human	infected	Early	Yes	unknown	D	56.5	1.75	19	0
Sample_16	911350	Human	infected	Early	Yes	unknown	D	128.5	2.11	37	0
Sample_17	911351	Human	infected	Early	Yes	unknown	D	228.5	2.36	45	1
Sample_18	911353	Human	infected	Early	Yes	unknown	D	84	1.92	29	0
Sample_19	911841	Human	infected	Early	Yes	unknown	D	10	1	4	0
Sample_20	911844	Human	infected	Early	Yes	unknown	D	181.5	2.26	42	1
Sample_21	911847	Human	infected	Early	Yes	unknown	D	164	2.21	41	0
Sample_22	920057	Human	infected	Late	Yes	unknown	D	41	1.61	14	0
Sample_23	921982	Human	infected	Early	Yes	unknown	D	85.5	1.93	30	0
Sample_24	930206	Human	infected	Early	Yes	unknown	D	103	2.01	32	0
Sample_25	931414	Human	infected	Early	Yes	unknown	D	118	2.07	34	0
Sample_26	940357	Human	infected	Disseminated	Yes	unknown	D	64.5	1.81	23	0
Sample_27	940880	Human	infected	Late	Yes	unknown	D	3297.5	3.52	52	1
Sample_28	Steere 12	Human	infected	Lyme Arthritis	Yes	unknown	D	65	1.81	24	0
Sample_29	Steere 13	Human	infected	Disseminated or Late	Yes	unknown	D	24.5	1.39	8	0
Sample_30	Steere 17	Human	infected	Disseminated or Late	Yes	unknown	D	82.5	1.92	28	0
Sample_31	Steere 18	Human	infected	Lyme Arthritis	Yes	unknown	D	212.5	2.33	44	1
Sample_32	Steere 20	Human	infected	Lyme Arthritis	Yes	unknown	D	59	1.77	20	0
Sample_33	Steere 21	Human	infected	Disseminated or Late	Yes	unknown	D	62.5	1.8	22	0
Sample_34	Steere 22	Human	infected	Lyme Arthritis	Yes	unknown	D	52.5	1.72	18	0
Sample_35	Steere 24	Human	infected	Disseminated or Late	Yes	unknown	D	14.5	1.16	5	0
Sample_36	Steere 25	Human	infected	Lyme Arthritis	Yes	unknown	D	30	1.48	11	0
Sample_37	Steere 27	Human	infected	Lyme Arthritis	Yes	unknown	D	25.5	1.41	9	0
Sample_38	Steere 3	Human	infected	Lyme Arthritis	Yes	unknown	D	5	0.7	2	0
Sample_39	Steere 30	Human	infected	Disseminated or Late	Yes	unknown	D	26	1.41	10	0
Sample_40	Steere 31	Human	infected	Lyme Arthritis	Yes	unknown	D	43	1.63	15.5	0
Sample_41	Steere 33	Human	infected	Disseminated or Late	Yes	unknown	D	93	1.97	31	0
Sample_42	Steere 35	Human	infected	Lyme Arthritis	Yes	unknown	D	133.5	2.13	38	0
Sample_43	Steere 37	Human	infected	Disseminated or Late	Yes	unknown	D	17	1.23	6	0
Sample_44	Steere 39	Human	infected	Lyme Arthritis	Yes	unknown	D	9	0.95	3	0
Sample_45	Steere 41	Human	infected	Lyme Arthritis	Yes	unknown	D	120	2.08	35	0
Sample_46	Steere 42	Human	infected	Disseminated or Late	Yes	unknown	D	77	1.89	27	0
Sample_47	Steere 43	Human	infected	Disseminated or Late	Yes	unknown	D	71	1.85	26	0
Sample_48	Steere 46	Human	infected	Lyme Arthritis	Yes	unknown	D	1	0	1	0
Sample_49	Steere 47	Human	infected	Lyme Arthritis	Yes	unknown	D	20.5	1.31	7	0
Sample_50	Steere 50	Human	infected	Lyme Arthritis	Yes	unknown	D	351.5	2.55	48	1
Sample_51	Steere 54	Human	infected	Lyme Arthritis	Yes	unknown	D	6328.5	3.8	55	1
Sample_52	Steere 57	Human	infected	Lyme Arthritis	Yes	unknown	D	327	2.51	47	1
Sample_53	Steere 58	Human	infected	Disseminated or Late	Yes	unknown	D	488	2.69	49	1
Sample_54	Steere 6	Human	infected	Lyme Arthritis	Yes	unknown	D	110.5	2.04	33	0
Sample_55	Steere 8	Human	infected	Lyme Arthritis	Yes	unknown	D	40.5	1.61	13	0
Sample_56	900874	Human	control	none	No	none	D	84.5	1.93	N/A	N/A
Sample_57	900875	Human	control	none	No	none	D	70	1.85	N/A	N/A
Sample_58	900876	Human	control	none	No	none	D	33.5	1.53	N/A	N/A
Sample_59	900877	Human	control	none	No	none	D	51.5	1.71	N/A	N/A
Sample_60	900878	Human	control	none	No	none	D	108	2.03	N/A	N/A
Sample_61	Steere 10	Human	control	none	No	none	D	18	1.26	N/A	N/A
Sample_62	Steere 11	Human	control	none	No	none	D	7	0.85	N/A	N/A
Sample_63	Steere 14	Human	control	none	No	none	D	1	0	N/A	N/A
Sample_64	Steere 19	Human	control	none	No	none	D	1	0	N/A	N/A
Sample_65	Steere 2	Human	control	none	No	none	D	33	1.52	N/A	N/A
Sample_66	Steere 23	Human	control	none	No	none	D	56	1.75	N/A	N/A
Sample_67	Steere 28	Human	control	none	No	none	D	16.5	1.22	N/A	N/A
Sample_68	Steere 32	Human	control	none	No	none	D	1	0	N/A	N/A
Sample_69	Steere 34	Human	control	none	No	none	D	6.5	0.81	N/A	N/A
Sample_70	Steere 36	Human	control	none	No	none	D	3	0.48	N/A	N/A
Sample_71	Steere 38	Human	control	none	No	none	D	13.5	1.13	N/A	N/A
Sample_72	Steere 44	Human	control	none	No	none	D	1	0	N/A	N/A
Sample_73	Steere 45	Human	control	none	No	none	D	3.5	0.54	N/A	N/A
Sample_74	Steere 49	Human	control	none	No	none	D	136.5	2.14	N/A	N/A
Sample_75	Steere 5	Human	control	none	No	none	D	1	0	N/A	N/A
Sample_76	Steere 52	Human	control	none	No	none	D	27.5	1.44	N/A	N/A
Sample_77	Steere 53	Human	control	none	No	none	D	20.5	1.31	N/A	N/A
Sample_78	Steere 56	Human	control	none	No	none	D	9.5	0.98	N/A	N/A
Sample_79	Steere 59	Human	control	none	No	none	D	33	1.52	N/A	N/A
Sample_80	Steere 60	Human	control	none	No	none	D	67	1.83	N/A	N/A
Sample_81	27577 4	Peromyscus	infected	N/A	Yes	F	D	501.5	2.7	6	0
Sample_82	27577 5	Peromyscus	infected	N/A	Yes	F	D	497	2.7	5	0
Sample_83	HB19 1	Peromyscus	infected	N/A	Yes	I	D	7039	3.85	21	1
Sample_84	HB19 2	Peromyscus	infected	N/A	Yes	I	D	6140	3.79	20	1
Sample_85	HB19 3	Peromyscus	infected	N/A	Yes	I	D	2084.5	3.32	15	1
Sample_86	HB19 4	Peromyscus	infected	N/A	Yes	I	D	1896.5	3.28	13	1
Sample_87	IDS 1	Peromyscus	infected	N/A	Yes	A and N	D	2307.5	3.36	16	1
Sample_88	IDS 2	Peromyscus	infected	N/A	Yes	A and N	D	36269	4.56	23	1
Sample_89	IDS 3	Peromyscus	infected	N/A	Yes	A and N	D	547.5	2.74	8	0
Sample_90	IDS 4	Peromyscus	infected	N/A	Yes	A and N	D	1973	3.3	14	1
Sample_91	IDS 5	Peromyscus	infected	N/A	Yes	A and N	D	397.5	2.6	3	0
Sample_92	SH2 1	Peromyscus	infected	N/A	Yes	K	D	523.75	2.72	7	0
Sample_93	SH2 3	Peromyscus	infected	N/A	Yes	K	D	10404	4.02	22	1
Sample_94	SH2 4	Peromyscus	infected	N/A	Yes	K	D	187.5	2.27	2	0
Sample_95	TBO2 1	Peromyscus	infected	N/A	Yes	N	D	1574.5	3.2	12	1
Sample_96	TBO2 2	Peromyscus	infected	N/A	Yes	N	D	748	2.87	9	0
Sample_97	TBO2 3	Peromyscus	infected	N/A	Yes	N	D	1076.5	3.03	11	0
Sample_98	TBO2 4	Peromyscus	infected	N/A	Yes	N	D	3275	3.52	19	1
Sample_99	TBO2 5	Peromyscus	infected	N/A	Yes	N	D	449	2.65	4	0
Sample_100	WQR 1	Peromyscus	infected	N/A	Yes	T	D	3076	3.49	17	1
Sample_101	WQR 2	Peromyscus	infected	N/A	Yes	T	D	3126.5	3.5	18	1
Sample_102	WQR 3	Peromyscus	infected	N/A	Yes	T	D	899	2.95	10	0
Sample_103	WQR 5	Peromyscus	infected	N/A	Yes	T	D	113	2.05	1	0
Sample_104	NAIVE 1	Peromyscus	control	N/A	No	none	D	334.5	2.52	N/A	N/A
Sample_105	NAIVE 2	Peromyscus	control	N/A	No	none	D	1	0	N/A	N/A
Sample_106	NAIVE 3	Peromyscus	control	N/A	No	none	D	107.5	2.03	N/A	N/A
Sample_107	NAIVE 4	Peromyscus	control	N/A	No	none	D	246.5	2.39	N/A	N/A
Sample_108	NAIVE 5	Peromyscus	control	N/A	No	none	D	211	2.32	N/A	N/A
Sample_109	NAIVE 6	Peromyscus	control	N/A	No	none	D	1	0	N/A	N/A
Sample_110	NAIVE 7	Peromyscus	control	N/A	No	none	D	102	2.01	N/A	N/A
Sample_1	902111	Human	infected	Disseminated	Yes	unknown	D3	597.5	2.78	25	1
Sample_2	902436	Human	infected	Late	Yes	unknown	D3	106.5	2.03	5	0
Sample_3	902622	Human	infected	Disseminated	Yes	unknown	D3	5572.5	3.75	50	1
Sample_4	902668	Human	infected	Disseminated	Yes	unknown	D3	1378	3.14	36	1
Sample_5	910531	Human	infected	Disseminated	Yes	unknown	D3	122	2.09	6	0
Sample_6	910532	Human	infected	Late	Yes	unknown	D3	67.5	1.83	2	0
Sample_7	910533	Human	infected	Late	Yes	unknown	D3	815.5	2.91	30	1
Sample_8	910544	Human	infected	Late	Yes	unknown	D3	4091.5	3.61	46	1
Sample_9	910794	Human	infected	Late	Yes	unknown	D3	491	2.69	20	1
Sample_10	910900	Human	infected	Disseminated	Yes	unknown	D3	17706.5	4.25	53	1
Sample_11	910943	Human	infected	Late	Yes	unknown	D3	283	2.45	15	1
Sample_12	911104	Human	infected	Disseminated	Yes	unknown	D3	1395	3.14	37	1
Sample_13	911347	Human	infected	Early	Yes	unknown	D3	571	2.76	23	1
Sample_14	911348	Human	infected	Early	Yes	unknown	D3	57638	4.76	55	1
Sample_15	911349	Human	infected	Early	Yes	unknown	D3	7623.5	3.88	51	1
Sample_16	911350	Human	infected	Early	Yes	unknown	D3	514.5	2.71	22	1
Sample_17	911351	Human	infected	Early	Yes	unknown	D3	988.5	2.99	33	1
Sample_18	911353	Human	infected	Early	Yes	unknown	D3	128.5	2.11	7	0
Sample_19	911841	Human	infected	Early	Yes	unknown	D3	76	1.88	4	0
Sample_20	911844	Human	infected	Early	Yes	unknown	D3	2118	3.33	42	1
Sample_21	911847	Human	infected	Early	Yes	unknown	D3	2050	3.31	41	1
Sample_22	920057	Human	infected	Late	Yes	unknown	D3	160	2.2	11	0
Sample_23	921982	Human	infected	Early	Yes	unknown	D3	1476.5	3.17	38	1
Sample_24	930206	Human	infected	Early	Yes	unknown	D3	1323	3.12	35	1
Sample_25	931414	Human	infected	Early	Yes	unknown	D3	4673.5	3.67	48	1
Sample_26	940357	Human	infected	Disseminated	Yes	unknown	D3	302	2.48	16	1
Sample_27	940880	Human	infected	Late	Yes	unknown	D3	37538	4.57	54	1
Sample_28	Steere 12	Human	infected	Lyme Arthritis	Yes	unknown	D3	730	2.86	29	1
Sample_29	Steere 13	Human	infected	Disseminated or Late	Yes	unknown	D3	5065	3.7	49	1
Sample_30	Steere 17	Human	infected	Disseminated or Late	Yes	unknown	D3	901	2.95	32	1
Sample_31	Steere 18	Human	infected	Lyme Arthritis	Yes	unknown	D3	1067.5	3.03	34	1
Sample_32	Steere 20	Human	infected	Lyme Arthritis	Yes	unknown	D3	577.5	2.76	24	1
Sample_33	Steere 21	Human	infected	Disseminated or Late	Yes	unknown	D3	1602	3.2	39	1
Sample_34	Steere 22	Human	infected	Lyme Arthritis	Yes	unknown	D3	8.5	0.93	1	0
Sample_35	Steere 24	Human	infected	Disseminated or Late	Yes	unknown	D3	598.5	2.78	26.5	1
Sample_36	Steere 25	Human	infected	Lyme Arthritis	Yes	unknown	D3	816	2.91	31	1
Sample_37	Steere 27	Human	infected	Lyme Arthritis	Yes	unknown	D3	143.5	2.16	10	0
Sample_38	Steere 3	Human	infected	Lyme Arthritis	Yes	unknown	D3	395	2.6	18	1
Sample_39	Steere 30	Human	infected	Disseminated or Late	Yes	unknown	D3	141	2.15	9	0
Sample_40	Steere 31	Human	infected	Lyme Arthritis	Yes	unknown	D3	251	2.4	14	1
Sample_41	Steere 33	Human	infected	Disseminated or Late	Yes	unknown	D3	132	2.12	8	0
Sample_42	Steere 35	Human	infected	Lyme Arthritis	Yes	unknown	D3	598.5	2.78	26.5	1
Sample_43	Steere 37	Human	infected	Disseminated or Late	Yes	unknown	D3	704	2.85	28	1
Sample_44	Steere 39	Human	infected	Lyme Arthritis	Yes	unknown	D3	4465.5	3.65	47	1
Sample_45	Steere 41	Human	infected	Lyme Arthritis	Yes	unknown	D3	498.5	2.7	21	1
Sample_46	Steere 42	Human	infected	Disseminated or Late	Yes	unknown	D3	1815.5	3.26	40	1
Sample_47	Steere 43	Human	infected	Disseminated or Late	Yes	unknown	D3	2485.5	3.4	44	1
Sample_48	Steere 46	Human	infected	Lyme Arthritis	Yes	unknown	D3	72.5	1.86	3	0
Sample_49	Steere 47	Human	infected	Lyme Arthritis	Yes	unknown	D3	239.5	2.38	13	1
Sample_50	Steere 50	Human	infected	Lyme Arthritis	Yes	unknown	D3	418	2.62	19	1
Sample_51	Steere 54	Human	infected	Lyme Arthritis	Yes	unknown	D3	15156.5	4.18	52	1
Sample_52	Steere 57	Human	infected	Lyme Arthritis	Yes	unknown	D3	367.5	2.57	17	1
Sample_53	Steere 58	Human	infected	Disseminated or Late	Yes	unknown	D3	2648	3.42	45	1
Sample_54	Steere 6	Human	infected	Lyme Arthritis	Yes	unknown	D3	2483	3.39	43	1
Sample_55	Steere 8	Human	infected	Lyme Arthritis	Yes	unknown	D3	233	2.37	12	1
Sample_56	900874	Human	control	none	No	none	D3	97.5	1.99	N/A	N/A
Sample_57	900875	Human	control	none	No	none	D3	193.5	2.29	N/A	N/A
Sample_58	900876	Human	control	none	No	none	D3	65	1.81	N/A	N/A
Sample_59	900877	Human	control	none	No	none	D3	66.5	1.82	N/A	N/A
Sample_60	900878	Human	control	none	No	none	D3	758	2.88	N/A	N/A
Sample_61	Steere 10	Human	control	none	No	none	D3	419.5	2.62	N/A	N/A
Sample_62	Steere 11	Human	control	none	No	none	D3	121	2.08	N/A	N/A
Sample_63	Steere 14	Human	control	none	No	none	D3	49	1.69	N/A	N/A
Sample_64	Steere 19	Human	control	none	No	none	D3	52	1.72	N/A	N/A
Sample_65	Steere 2	Human	control	none	No	none	D3	228	2.36	N/A	N/A
Sample_66	Steere 23	Human	control	none	No	none	D3	103	2.01	N/A	N/A
Sample_67	Steere 28	Human	control	none	No	none	D3	75	1.88	N/A	N/A
Sample_68	Steere 32	Human	control	none	No	none	D3	28.5	1.45	N/A	N/A
Sample_69	Steere 34	Human	control	none	No	none	D3	61.5	1.79	N/A	N/A
Sample_70	Steere 36	Human	control	none	No	none	D3	95	1.98	N/A	N/A
Sample_71	Steere 38	Human	control	none	No	none	D3	68	1.83	N/A	N/A
Sample_72	Steere 44	Human	control	none	No	none	D3	238.5	2.38	N/A	N/A
Sample_73	Steere 45	Human	control	none	No	none	D3	69.5	1.84	N/A	N/A
Sample_74	Steere 49	Human	control	none	No	none	D3	275.5	2.44	N/A	N/A
Sample_75	Steere 5	Human	control	none	No	none	D3	60	1.78	N/A	N/A
Sample_76	Steere 52	Human	control	none	No	none	D3	313	2.5	N/A	N/A
Sample_77	Steere 53	Human	control	none	No	none	D3	159	2.2	N/A	N/A
Sample_78	Steere 56	Human	control	none	No	none	D3	234	2.37	N/A	N/A
Sample_79	Steere 59	Human	control	none	No	none	D3	163	2.21	N/A	N/A
Sample_80	Steere 60	Human	control	none	No	none	D3	366.5	2.56	N/A	N/A
Sample_81	27577 4	Peromyscus	infected	N/A	Yes	F	D3	232.5	2.37	2	0
Sample_82	27577 5	Peromyscus	infected	N/A	Yes	F	D3	892.5	2.95	7	0
Sample_83	HB19 1	Peromyscus	infected	N/A	Yes	I	D3	335	2.53	4	0
Sample_84	HB19 2	Peromyscus	infected	N/A	Yes	I	D3	1	0	1	0
Sample_85	HB19 3	Peromyscus	infected	N/A	Yes	I	D3	1250	3.1	8	1
Sample_86	HB19 4	Peromyscus	infected	N/A	Yes	I	D3	1444.5	3.16	10	1
Sample_87	IDS 1	Peromyscus	infected	N/A	Yes	A and N	D3	15817	4.2	21	1
Sample_88	IDS 2	Peromyscus	infected	N/A	Yes	A and N	D3	51692	4.71	23	1
Sample_89	IDS 3	Peromyscus	infected	N/A	Yes	A and N	D3	1795	3.25	12	1
Sample_90	IDS 4	Peromyscus	infected	N/A	Yes	A and N	D3	17589.5	4.25	22	1
Sample_91	IDS 5	Peromyscus	infected	N/A	Yes	A and N	D3	1825	3.26	13	1
Sample_92	SH2 1	Peromyscus	infected	N/A	Yes	K	D3	809	2.91	6	0
Sample_93	SH2 3	Peromyscus	infected	N/A	Yes	K	D3	4343	3.64	16	1
Sample_94	SH2 4	Peromyscus	infected	N/A	Yes	K	D3	557	2.75	5	0
Sample_95	TBO2 1	Peromyscus	infected	N/A	Yes	N	D3	15663.5	4.19	20	1
Sample_96	TBO2 2	Peromyscus	infected	N/A	Yes	N	D3	8179	3.91	18	1
Sample_97	TBO2 3	Peromyscus	infected	N/A	Yes	N	D3	4108.5	3.61	15	1
Sample_98	TBO2 4	Peromyscus	infected	N/A	Yes	N	D3	10905	4.04	19	1
Sample_99	TBO2 5	Peromyscus	infected	N/A	Yes	N	D3	3577	3.55	14	1
Sample_100	WQR 1	Peromyscus	infected	N/A	Yes	T	D3	1511	3.18	11	1
Sample_101	WQR 2	Peromyscus	infected	N/A	Yes	T	D3	5816.5	3.76	17	1
Sample_102	WQR 3	Peromyscus	infected	N/A	Yes	T	D3	1423	3.15	9	1
Sample_103	WQR 5	Peromyscus	infected	N/A	Yes	T	D3	307.5	2.49	3	0
Sample_104	NAIVE 1	Peromyscus	control	N/A	No	none	D3	507	2.71	N/A	N/A
Sample_105	NAIVE 2	Peromyscus	control	N/A	No	none	D3	210.5	2.32	N/A	N/A
Sample_106	NAIVE 3	Peromyscus	control	N/A	No	none	D3	174	2.24	N/A	N/A
Sample_107	NAIVE 4	Peromyscus	control	N/A	No	none	D3	254	2.4	N/A	N/A
Sample_108	NAIVE 5	Peromyscus	control	N/A	No	none	D3	241.5	2.38	N/A	N/A
Sample_109	NAIVE 6	Peromyscus	control	N/A	No	none	D3	100	2	N/A	N/A
Sample_110	NAIVE 7	Peromyscus	control	N/A	No	none	D3	1	0	N/A	N/A
Sample_1	902111	Human	infected	Disseminated	Yes	unknown	E	346	2.54	44	1
Sample_2	902436	Human	infected	Late	Yes	unknown	E	37	1.57	4	0
Sample_3	902622	Human	infected	Disseminated	Yes	unknown	E	507	2.71	46	1
Sample_4	902668	Human	infected	Disseminated	Yes	unknown	E	356	2.55	45	1
Sample_5	910531	Human	infected	Disseminated	Yes	unknown	E	114	2.06	25.5	0
Sample_6	910532	Human	infected	Late	Yes	unknown	E	111	2.05	24	0
Sample_7	910533	Human	infected	Late	Yes	unknown	E	61	1.79	11.5	0
Sample_8	910544	Human	infected	Late	Yes	unknown	E	180	2.26	36	1
Sample_9	910794	Human	infected	Late	Yes	unknown	E	132	2.12	29.5	0
Sample_10	910900	Human	infected	Disseminated	Yes	unknown	E	6427	3.81	53	1
Sample_11	910943	Human	infected	Late	Yes	unknown	E	77	1.89	17.5	0
Sample_12	911104	Human	infected	Disseminated	Yes	unknown	E	49	1.69	6	0
Sample_13	911347	Human	infected	Early	Yes	unknown	E	103	2.01	23	0
Sample_14	911348	Human	infected	Early	Yes	unknown	E	6762	3.83	54	1
Sample_15	911349	Human	infected	Early	Yes	unknown	E	54	1.73	10	0
Sample_16	911350	Human	infected	Early	Yes	unknown	E	135	2.13	31	0
Sample_17	911351	Human	infected	Early	Yes	unknown	E	548	2.74	48	1
Sample_18	911353	Human	infected	Early	Yes	unknown	E	71	1.85	14	0
Sample_19	911841	Human	infected	Early	Yes	unknown	E	31	1.49	2	0
Sample_20	911844	Human	infected	Early	Yes	unknown	E	221	2.34	41	1
Sample_21	911847	Human	infected	Early	Yes	unknown	E	197	2.29	39	1
Sample_22	920057	Human	infected	Late	Yes	unknown	E	61	1.79	11.5	0
Sample_23	921982	Human	infected	Early	Yes	unknown	E	198	2.3	40	1
Sample_24	930206	Human	infected	Early	Yes	unknown	E	254	2.4	42	1
Sample_25	931414	Human	infected	Early	Yes	unknown	E	143	2.16	32	0
Sample_26	940357	Human	infected	Disseminated	Yes	unknown	E	132	2.12	29.5	0
Sample_27	940880	Human	infected	Late	Yes	unknown	E	5322	3.73	52	1
Sample_28	Steere 12	Human	infected	Lyme Arthritis	Yes	unknown	E	158	2.2	33	0
Sample_29	Steere 13	Human	infected	Disseminated or Late	Yes	unknown	E	34	1.53	3	0
Sample_30	Steere 17	Human	infected	Disseminated or Late	Yes	unknown	E	45	1.65	5	0
Sample_31	Steere 18	Human	infected	Lyme Arthritis	Yes	unknown	E	620	2.79	51	1
Sample_32	Steere 20	Human	infected	Lyme Arthritis	Yes	unknown	E	93	1.97	21	0
Sample_33	Steere 21	Human	infected	Disseminated or Late	Yes	unknown	E	50	1.7	7	0
Sample_34	Steere 22	Human	infected	Lyme Arthritis	Yes	unknown	E	101	2	22	0
Sample_35	Steere 24	Human	infected	Disseminated or Late	Yes	unknown	E	72	1.86	15	0
Sample_36	Steere 25	Human	infected	Lyme Arthritis	Yes	unknown	E	261	2.42	43	1
Sample_37	Steere 27	Human	infected	Lyme Arthritis	Yes	unknown	E	77	1.89	17.5	0
Sample_38	Steere 3	Human	infected	Lyme Arthritis	Yes	unknown	E	53	1.72	9	0
Sample_39	Steere 30	Human	infected	Disseminated or Late	Yes	unknown	E	51	1.71	8	0
Sample_40	Steere 31	Human	infected	Lyme Arthritis	Yes	unknown	E	83	1.92	20	0
Sample_41	Steere 33	Human	infected	Disseminated or Late	Yes	unknown	E	81	1.91	19	0
Sample_42	Steere 35	Human	infected	Lyme Arthritis	Yes	unknown	E	181	2.26	37	1
Sample_43	Steere 37	Human	infected	Disseminated or Late	Yes	unknown	E	75	1.88	16	0
Sample_44	Steere 39	Human	infected	Lyme Arthritis	Yes	unknown	E	66	1.82	13	0
Sample_45	Steere 41	Human	infected	Lyme Arthritis	Yes	unknown	E	125	2.1	27	0
Sample_46	Steere 42	Human	infected	Disseminated or Late	Yes	unknown	E	129	2.11	28	0
Sample_47	Steere 43	Human	infected	Disseminated or Late	Yes	unknown	E	114	2.06	25.5	0
Sample_48	Steere 46	Human	infected	Lyme Arthritis	Yes	unknown	E	4	0.6	1	0
Sample_49	Steere 47	Human	infected	Lyme Arthritis	Yes	unknown	E	188	2.27	38	1
Sample_50	Steere 50	Human	infected	Lyme Arthritis	Yes	unknown	E	569	2.76	49	1
Sample_51	Steere 54	Human	infected	Lyme Arthritis	Yes	unknown	E	17071	4.23	55	1
Sample_52	Steere 57	Human	infected	Lyme Arthritis	Yes	unknown	E	526	2.72	47	1
Sample_53	Steere 58	Human	infected	Disseminated or Late	Yes	unknown	E	581	2.76	50	1
Sample_54	Steere 6	Human	infected	Lyme Arthritis	Yes	unknown	E	176	2.25	35	1
Sample_55	Steere 8	Human	infected	Lyme Arthritis	Yes	unknown	E	172	2.24	34	0
Sample_56	900874	Human	control	none	No	none	E	124	2.09	N/A	N/A
Sample_57	900875	Human	control	none	No	none	E	91	1.96	N/A	N/A
Sample_58	900876	Human	control	none	No	none	E	37	1.57	N/A	N/A
Sample_59	900877	Human	control	none	No	none	E	87	1.94	N/A	N/A
Sample_60	900878	Human	control	none	No	none	E	220	2.34	N/A	N/A
Sample_61	Steere 10	Human	control	none	No	none	E	58	1.76	N/A	N/A
Sample_62	Steere 11	Human	control	none	No	none	E	108	2.03	N/A	N/A
Sample_63	Steere 14	Human	control	none	No	none	E	42	1.62	N/A	N/A
Sample_64	Steere 19	Human	control	none	No	none	E	43	1.63	N/A	N/A
Sample_65	Steere 2	Human	control	none	No	none	E	59	1.77	N/A	N/A
Sample_66	Steere 23	Human	control	none	No	none	E	51	1.71	N/A	N/A
Sample_67	Steere 28	Human	control	none	No	none	E	37	1.57	N/A	N/A
Sample_68	Steere 32	Human	control	none	No	none	E	34	1.53	N/A	N/A
Sample_69	Steere 34	Human	control	none	No	none	E	21	1.32	N/A	N/A
Sample_70	Steere 36	Human	control	none	No	none	E	45	1.65	N/A	N/A
Sample_71	Steere 38	Human	control	none	No	none	E	42	1.62	N/A	N/A
Sample_72	Steere 44	Human	control	none	No	none	E	232	2.37	N/A	N/A
Sample_73	Steere 45	Human	control	none	No	none	E	20	1.3	N/A	N/A
Sample_74	Steere 49	Human	control	none	No	none	E	267	2.43	N/A	N/A
Sample_75	Steere 5	Human	control	none	No	none	E	47	1.67	N/A	N/A
Sample_76	Steere 52	Human	control	none	No	none	E	177	2.25	N/A	N/A
Sample_77	Steere 53	Human	control	none	No	none	E	136	2.13	N/A	N/A
Sample_78	Steere 56	Human	control	none	No	none	E	76	1.88	N/A	N/A
Sample_79	Steere 59	Human	control	none	No	none	E	235	2.37	N/A	N/A
Sample_80	Steere 60	Human	control	none	No	none	E	533	2.73	N/A	N/A
Sample_81	27577 4	Peromyscus	infected	N/A	Yes	F	E	927	2.97	12	0
Sample_82	27577 5	Peromyscus	infected	N/A	Yes	F	E	574	2.76	9	0
Sample_83	HB19 1	Peromyscus	infected	N/A	Yes	I	E	6579.5	3.82	21	1
Sample_84	HB19 2	Peromyscus	infected	N/A	Yes	I	E	1	0	1	0
Sample_85	HB19 3	Peromyscus	infected	N/A	Yes	I	E	475	2.68	5	0
Sample_86	HB19 4	Peromyscus	infected	N/A	Yes	I	E	1448.5	3.16	15	1
Sample_87	IDS 1	Peromyscus	infected	N/A	Yes	A and N	E	2193.5	3.34	18	1
Sample_88	IDS 2	Peromyscus	infected	N/A	Yes	A and N	E	21867	4.34	23	1
Sample_89	IDS 3	Peromyscus	infected	N/A	Yes	A and N	E	513.5	2.71	7	0
Sample_90	IDS 4	Peromyscus	infected	N/A	Yes	A and N	E	2134	3.33	17	1
Sample_91	IDS 5	Peromyscus	infected	N/A	Yes	A and N	E	521	2.72	8	0
Sample_92	SH2 1	Peromyscus	infected	N/A	Yes	K	E	480.5	2.68	6	0
Sample_93	SH2 3	Peromyscus	infected	N/A	Yes	K	E	9765	3.99	22	1
Sample_94	SH2 4	Peromyscus	infected	N/A	Yes	K	E	221.5	2.35	3	0
Sample_95	TBO2 1	Peromyscus	infected	N/A	Yes	N	E	983	2.99	13	0
Sample_96	TBO2 2	Peromyscus	infected	N/A	Yes	N	E	678.5	2.83	10	0
Sample_97	TBO2 3	Peromyscus	infected	N/A	Yes	N	E	2095	3.32	16	1
Sample_98	TBO2 4	Peromyscus	infected	N/A	Yes	N	E	2741.5	3.44	19	1
Sample_99	TBO2 5	Peromyscus	infected	N/A	Yes	N	E	788	2.9	11	0
Sample_100	WQR 1	Peromyscus	infected	N/A	Yes	T	E	1045.5	3.02	14	0
Sample_101	WQR 2	Peromyscus	infected	N/A	Yes	T	E	3856	3.59	20	1
Sample_102	WQR 3	Peromyscus	infected	N/A	Yes	T	E	377.5	2.58	4	0
Sample_103	WQR 5	Peromyscus	infected	N/A	Yes	T	E	141.5	2.15	2	0
Sample_104	NAIVE 1	Peromyscus	control	N/A	No	none	E	541.5	2.73	N/A	N/A
Sample_105	NAIVE 2	Peromyscus	control	N/A	No	none	E	217	2.34	N/A	N/A
Sample_106	NAIVE 3	Peromyscus	control	N/A	No	none	E	131	2.12	N/A	N/A
Sample_107	NAIVE 4	Peromyscus	control	N/A	No	none	E	217	2.34	N/A	N/A
Sample_108	NAIVE 5	Peromyscus	control	N/A	No	none	E	226.5	2.36	N/A	N/A
Sample_109	NAIVE 6	Peromyscus	control	N/A	No	none	E	74	1.87	N/A	N/A
Sample_110	NAIVE 7	Peromyscus	control	N/A	No	none	E	182	2.26	N/A	N/A
Sample_1	902111	Human	infected	Disseminated	Yes	unknown	E3	237.5	2.38	24	1
Sample_2	902436	Human	infected	Late	Yes	unknown	E3	97	1.99	10	0
Sample_3	902622	Human	infected	Disseminated	Yes	unknown	E3	2132	3.33	48	1
Sample_4	902668	Human	infected	Disseminated	Yes	unknown	E3	358.5	2.55	31.5	1
Sample_5	910531	Human	infected	Disseminated	Yes	unknown	E3	190.5	2.28	19	1
Sample_6	910532	Human	infected	Late	Yes	unknown	E3	86	1.93	9	0
Sample_7	910533	Human	infected	Late	Yes	unknown	E3	74	1.87	6	0
Sample_8	910544	Human	infected	Late	Yes	unknown	E3	307.5	2.49	26	1
Sample_9	910794	Human	infected	Late	Yes	unknown	E3	153	2.18	17	0
Sample_10	910900	Human	infected	Disseminated	Yes	unknown	E3	12897	4.11	52	1
Sample_11	910943	Human	infected	Late	Yes	unknown	E3	85.5	1.93	8	0
Sample_12	911104	Human	infected	Disseminated	Yes	unknown	E3	378.5	2.58	33	1
Sample_13	911347	Human	infected	Early	Yes	unknown	E3	240.5	2.38	25	1
Sample_14	911348	Human	infected	Early	Yes	unknown	E3	23972.5	4.38	55	1
Sample_15	911349	Human	infected	Early	Yes	unknown	E3	413	2.62	35	1
Sample_16	911350	Human	infected	Early	Yes	unknown	E3	381.5	2.58	34	1
Sample_17	911351	Human	infected	Early	Yes	unknown	E3	2758	3.44	49	1
Sample_18	911353	Human	infected	Early	Yes	unknown	E3	83.5	1.92	7	0
Sample_19	911841	Human	infected	Early	Yes	unknown	E3	44	1.64	4	0
Sample_20	911844	Human	infected	Early	Yes	unknown	E3	471	2.67	37	1
Sample_21	911847	Human	infected	Early	Yes	unknown	E3	868.5	2.94	45	1
Sample_22	920057	Human	infected	Late	Yes	unknown	E3	69.5	1.84	5	0
Sample_23	921982	Human	infected	Early	Yes	unknown	E3	342.5	2.53	30	1
Sample_24	930206	Human	infected	Early	Yes	unknown	E3	489.5	2.69	38	1
Sample_25	931414	Human	infected	Early	Yes	unknown	E3	3305.5	3.52	51	1
Sample_26	940357	Human	infected	Disseminated	Yes	unknown	E3	134	2.13	15	0
Sample_27	940880	Human	infected	Late	Yes	unknown	E3	22410	4.35	54	1
Sample_28	Steere 12	Human	infected	Lyme Arthritis	Yes	unknown	E3	231	2.36	23	1
Sample_29	Steere 13	Human	infected	Disseminated or Late	Yes	unknown	E3	194.5	2.29	20	1
Sample_30	Steere 17	Human	infected	Disseminated or Late	Yes	unknown	E3	787.5	2.9	43	1
Sample_31	Steere 18	Human	infected	Lyme Arthritis	Yes	unknown	E3	826	2.92	44	1
Sample_32	Steere 20	Human	infected	Lyme Arthritis	Yes	unknown	E3	116.5	2.07	13	0
Sample_33	Steere 21	Human	infected	Disseminated or Late	Yes	unknown	E3	308	2.49	27	1
Sample_34	Steere 22	Human	infected	Lyme Arthritis	Yes	unknown	E3	141.5	2.15	16	0
Sample_35	Steere 24	Human	infected	Disseminated or Late	Yes	unknown	E3	195	2.29	21	1
Sample_36	Steere 25	Human	infected	Lyme Arthritis	Yes	unknown	E3	3220.5	3.51	50	1
Sample_37	Steere 27	Human	infected	Lyme Arthritis	Yes	unknown	E3	115	2.06	12	0
Sample_38	Steere 3	Human	infected	Lyme Arthritis	Yes	unknown	E3	6.5	0.81	1	0
Sample_39	Steere 30	Human	infected	Disseminated or Late	Yes	unknown	E3	32.5	1.51	3	0
Sample_40	Steere 31	Human	infected	Lyme Arthritis	Yes	unknown	E3	133	2.12	14	0
Sample_41	Steere 33	Human	infected	Disseminated or Late	Yes	unknown	E3	156.5	2.19	18	0
Sample_42	Steere 35	Human	infected	Lyme Arthritis	Yes	unknown	E3	358.5	2.55	31.5	1
Sample_43	Steere 37	Human	infected	Disseminated or Late	Yes	unknown	E3	108.5	2.04	11	0
Sample_44	Steere 39	Human	infected	Lyme Arthritis	Yes	unknown	E3	624	2.8	40	1
Sample_45	Steere 41	Human	infected	Lyme Arthritis	Yes	unknown	E3	203	2.31	22	1
Sample_46	Steere 42	Human	infected	Disseminated or Late	Yes	unknown	E3	1034	3.01	47	1
Sample_47	Steere 43	Human	infected	Disseminated or Late	Yes	unknown	E3	335.5	2.53	29	1
Sample_48	Steere 46	Human	infected	Lyme Arthritis	Yes	unknown	E3	24	1.38	2	0
Sample_49	Steere 47	Human	infected	Lyme Arthritis	Yes	unknown	E3	676	2.83	41	1
Sample_50	Steere 50	Human	infected	Lyme Arthritis	Yes	unknown	E3	437.5	2.64	36	1
Sample_51	Steere 54	Human	infected	Lyme Arthritis	Yes	unknown	E3	15397	4.19	53	1
Sample_52	Steere 57	Human	infected	Lyme Arthritis	Yes	unknown	E3	329.5	2.52	28	1
Sample_53	Steere 58	Human	infected	Disseminated or Late	Yes	unknown	E3	971	2.99	46	1
Sample_54	Steere 6	Human	infected	Lyme Arthritis	Yes	unknown	E3	550.5	2.74	39	1
Sample_55	Steere 8	Human	infected	Lyme Arthritis	Yes	unknown	E3	702.5	2.85	42	1
Sample_56	900874	Human	control	none	No	none	E3	143	2.16	N/A	N/A
Sample_57	900875	Human	control	none	No	none	E3	210	2.32	N/A	N/A
Sample_58	900876	Human	control	none	No	none	E3	72.5	1.86	N/A	N/A
Sample_59	900877	Human	control	none	No	none	E3	79	1.9	N/A	N/A
Sample_60	900878	Human	control	none	No	none	E3	58.5	1.77	N/A	N/A
Sample_61	Steere 10	Human	control	none	No	none	E3	114	2.06	N/A	N/A
Sample_62	Steere 11	Human	control	none	No	none	E3	404	2.61	N/A	N/A
Sample_63	Steere 14	Human	control	none	No	none	E3	25	1.4	N/A	N/A
Sample_64	Steere 19	Human	control	none	No	none	E3	237	2.37	N/A	N/A
Sample_65	Steere 2	Human	control	none	No	none	E3	84	1.92	N/A	N/A
Sample_66	Steere 23	Human	control	none	No	none	E3	86.5	1.94	N/A	N/A
Sample_67	Steere 28	Human	control	none	No	none	E3	99.5	2	N/A	N/A
Sample_68	Steere 32	Human	control	none	No	none	E3	10.5	1.02	N/A	N/A
Sample_69	Steere 34	Human	control	none	No	none	E3	81.5	1.91	N/A	N/A
Sample_70	Steere 36	Human	control	none	No	none	E3	97	1.99	N/A	N/A
Sample_71	Steere 38	Human	control	none	No	none	E3	25.5	1.41	N/A	N/A
Sample_72	Steere 44	Human	control	none	No	none	E3	862.5	2.94	N/A	N/A
Sample_73	Steere 45	Human	control	none	No	none	E3	30.5	1.48	N/A	N/A
Sample_74	Steere 49	Human	control	none	No	none	E3	304	2.48	N/A	N/A
Sample_75	Steere 5	Human	control	none	No	none	E3	58	1.76	N/A	N/A
Sample_76	Steere 52	Human	control	none	No	none	E3	196.5	2.29	N/A	N/A
Sample_77	Steere 53	Human	control	none	No	none	E3	261.5	2.42	N/A	N/A
Sample_78	Steere 56	Human	control	none	No	none	E3	98	1.99	N/A	N/A
Sample_79	Steere 59	Human	control	none	No	none	E3	203	2.31	N/A	N/A
Sample_80	Steere 60	Human	control	none	No	none	E3	785	2.89	N/A	N/A
Sample_81	27577 4	Peromyscus	infected	N/A	Yes	F	E3	1344.5	3.13	11	1
Sample_82	27577 5	Peromyscus	infected	N/A	Yes	F	E3	718.5	2.86	7	0
Sample_83	HB19 1	Peromyscus	infected	N/A	Yes	I	E3	14519.5	4.16	21	1
Sample_84	HB19 2	Peromyscus	infected	N/A	Yes	I	E3	11994.5	4.08	20	1
Sample_85	HB19 3	Peromyscus	infected	N/A	Yes	I	E3	38848.5	4.59	23	1
Sample_86	HB19 4	Peromyscus	infected	N/A	Yes	I	E3	3212.5	3.51	14	1
Sample_87	IDS 1	Peromyscus	infected	N/A	Yes	A and N	E3	5635.5	3.75	16	1
Sample_88	IDS 2	Peromyscus	infected	N/A	Yes	A and N	E3	28468.5	4.45	22	1
Sample_89	IDS 3	Peromyscus	infected	N/A	Yes	A and N	E3	772	2.89	8	0
Sample_90	IDS 4	Peromyscus	infected	N/A	Yes	A and N	E3	6961.5	3.84	17	1
Sample_91	IDS 5	Peromyscus	infected	N/A	Yes	A and N	E3	876.5	2.94	9	0
Sample_92	SH2 1	Peromyscus	infected	N/A	Yes	K	E3	492.75	2.69	3	0
Sample_93	SH2 3	Peromyscus	infected	N/A	Yes	K	E3	8373.5	3.92	18	1
Sample_94	SH2 4	Peromyscus	infected	N/A	Yes	K	E3	549	2.74	4	0
Sample_95	TBO2 1	Peromyscus	infected	N/A	Yes	N	E3	3172	3.5	13	1
Sample_96	TBO2 2	Peromyscus	infected	N/A	Yes	N	E3	677.5	2.83	6	0
Sample_97	TBO2 3	Peromyscus	infected	N/A	Yes	N	E3	2513.5	3.4	12	1
Sample_98	TBO2 4	Peromyscus	infected	N/A	Yes	N	E3	10934	4.04	19	1
Sample_99	TBO2 5	Peromyscus	infected	N/A	Yes	N	E3	365	2.56	2	0
Sample_100	WQR 1	Peromyscus	infected	N/A	Yes	T	E3	978.5	2.99	10	0
Sample_101	WQR 2	Peromyscus	infected	N/A	Yes	T	E3	5273.5	3.72	15	1
Sample_102	WQR 3	Peromyscus	infected	N/A	Yes	T	E3	647.5	2.81	5	0
Sample_103	WQR 5	Peromyscus	infected	N/A	Yes	T	E3	259.5	2.41	1	0
Sample_104	NAIVE 1	Peromyscus	control	N/A	No	none	E3	438	2.64	N/A	N/A
Sample_105	NAIVE 2	Peromyscus	control	N/A	No	none	E3	2	0.3	N/A	N/A
Sample_106	NAIVE 3	Peromyscus	control	N/A	No	none	E3	155.5	2.19	N/A	N/A
Sample_107	NAIVE 4	Peromyscus	control	N/A	No	none	E3	207	2.32	N/A	N/A
Sample_108	NAIVE 5	Peromyscus	control	N/A	No	none	E3	35	1.54	N/A	N/A
Sample_109	NAIVE 6	Peromyscus	control	N/A	No	none	E3	32	1.51	N/A	N/A
Sample_110	NAIVE 7	Peromyscus	control	N/A	No	none	E3	54.5	1.74	N/A	N/A
Sample_1	902111	Human	infected	Disseminated	Yes	unknown	F	267	2.43	37	1
Sample_2	902436	Human	infected	Late	Yes	unknown	F	24.5	1.39	3	0
Sample_3	902622	Human	infected	Disseminated	Yes	unknown	F	676	2.83	50	1
Sample_4	902668	Human	infected	Disseminated	Yes	unknown	F	172	2.24	27	0
Sample_5	910531	Human	infected	Disseminated	Yes	unknown	F	131	2.12	22	0
Sample_6	910532	Human	infected	Late	Yes	unknown	F	87	1.94	14	0
Sample_7	910533	Human	infected	Late	Yes	unknown	F	121.5	2.08	20	0
Sample_8	910544	Human	infected	Late	Yes	unknown	F	153.5	2.19	25	0
Sample_9	910794	Human	infected	Late	Yes	unknown	F	327.5	2.52	41	1
Sample_10	910900	Human	infected	Disseminated	Yes	unknown	F	7243	3.86	52	1
Sample_11	910943	Human	infected	Late	Yes	unknown	F	330	2.52	42	1
Sample_12	911104	Human	infected	Disseminated	Yes	unknown	F	87.5	1.94	15	0
Sample_13	911347	Human	infected	Early	Yes	unknown	F	72	1.86	9	0
Sample_14	911348	Human	infected	Early	Yes	unknown	F	8958.5	3.95	54	1
Sample_15	911349	Human	infected	Early	Yes	unknown	F	155.5	2.19	26	0
Sample_16	911350	Human	infected	Early	Yes	unknown	F	229.5	2.36	33	1
Sample_17	911351	Human	infected	Early	Yes	unknown	F	303.5	2.48	40	1
Sample_18	911353	Human	infected	Early	Yes	unknown	F	98	1.99	18	0
Sample_19	911841	Human	infected	Early	Yes	unknown	F	91	1.96	16	0
Sample_20	911844	Human	infected	Early	Yes	unknown	F	698	2.84	51	1
Sample_21	911847	Human	infected	Early	Yes	unknown	F	182.5	2.26	29	1
Sample_22	920057	Human	infected	Late	Yes	unknown	F	25	1.4	4	0
Sample_23	921982	Human	infected	Early	Yes	unknown	F	657.5	2.82	49	1
Sample_24	930206	Human	infected	Early	Yes	unknown	F	253.5	2.4	35	1
Sample_25	931414	Human	infected	Early	Yes	unknown	F	249.5	2.4	34	1
Sample_26	940357	Human	infected	Disseminated	Yes	unknown	F	135.5	2.13	24	0
Sample_27	940880	Human	infected	Late	Yes	unknown	F	8149.5	3.91	53	1
Sample_28	Steere 12	Human	infected	Lyme Arthritis	Yes	unknown	F	228.5	2.36	31.5	1
Sample_29	Steere 13	Human	infected	Disseminated or Late	Yes	unknown	F	46	1.66	7	0
Sample_30	Steere 17	Human	infected	Disseminated or Late	Yes	unknown	F	95	1.98	17	0
Sample_31	Steere 18	Human	infected	Lyme Arthritis	Yes	unknown	F	550.5	2.74	47	1
Sample_32	Steere 20	Human	infected	Lyme Arthritis	Yes	unknown	F	123.5	2.09	21	0
Sample_33	Steere 21	Human	infected	Disseminated or Late	Yes	unknown	F	86	1.93	13	0
Sample_34	Steere 22	Human	infected	Lyme Arthritis	Yes	unknown	F	131.5	2.12	23	0
Sample_35	Steere 24	Human	infected	Disseminated or Late	Yes	unknown	F	100.5	2	19	0
Sample_36	Steere 25	Human	infected	Lyme Arthritis	Yes	unknown	F	57.5	1.76	8	0
Sample_37	Steere 27	Human	infected	Lyme Arthritis	Yes	unknown	F	73.5	1.87	10	0
Sample_38	Steere 3	Human	infected	Lyme Arthritis	Yes	unknown	F	44.5	1.65	6	0
Sample_39	Steere 30	Human	infected	Disseminated or Late	Yes	unknown	F	18	1.26	2	0
Sample_40	Steere 31	Human	infected	Lyme Arthritis	Yes	unknown	F	228.5	2.36	31.5	1
Sample_41	Steere 33	Human	infected	Disseminated or Late	Yes	unknown	F	79	1.9	11	0
Sample_42	Steere 35	Human	infected	Lyme Arthritis	Yes	unknown	F	255	2.41	36	1
Sample_43	Steere 37	Human	infected	Disseminated or Late	Yes	unknown	F	40.5	1.61	5	0
Sample_44	Steere 39	Human	infected	Lyme Arthritis	Yes	unknown	F	85	1.93	12	0
Sample_45	Steere 41	Human	infected	Lyme Arthritis	Yes	unknown	F	187	2.27	30	1
Sample_46	Steere 42	Human	infected	Disseminated or Late	Yes	unknown	F	301	2.48	39	1
Sample_47	Steere 43	Human	infected	Disseminated or Late	Yes	unknown	F	172.5	2.24	28	0
Sample_48	Steere 46	Human	infected	Lyme Arthritis	Yes	unknown	F	6	0.78	1	0
Sample_49	Steere 47	Human	infected	Lyme Arthritis	Yes	unknown	F	378.5	2.58	43	1
Sample_50	Steere 50	Human	infected	Lyme Arthritis	Yes	unknown	F	582.5	2.77	48	1
Sample_51	Steere 54	Human	infected	Lyme Arthritis	Yes	unknown	F	12330	4.09	55	1
Sample_52	Steere 57	Human	infected	Lyme Arthritis	Yes	unknown	F	404	2.61	44	1
Sample_53	Steere 58	Human	infected	Disseminated or Late	Yes	unknown	F	405	2.61	45	1
Sample_54	Steere 6	Human	infected	Lyme Arthritis	Yes	unknown	F	515.5	2.71	46	1
Sample_55	Steere 8	Human	infected	Lyme Arthritis	Yes	unknown	F	284	2.45	38	1
Sample_56	900874	Human	control	none	No	none	F	89.5	1.95	N/A	N/A
Sample_57	900875	Human	control	none	No	none	F	93	1.97	N/A	N/A
Sample_58	900876	Human	control	none	No	none	F	51	1.71	N/A	N/A
Sample_59	900877	Human	control	none	No	none	F	20	1.3	N/A	N/A
Sample_60	900878	Human	control	none	No	none	F	99	2	N/A	N/A
Sample_61	Steere 10	Human	control	none	No	none	F	65	1.81	N/A	N/A
Sample_62	Steere 11	Human	control	none	No	none	F	182.5	2.26	N/A	N/A
Sample_63	Steere 14	Human	control	none	No	none	F	13.5	1.13	N/A	N/A
Sample_64	Steere 19	Human	control	none	No	none	F	59.5	1.77	N/A	N/A
Sample_65	Steere 2	Human	control	none	No	none	F	68.5	1.84	N/A	N/A
Sample_66	Steere 23	Human	control	none	No	none	F	82.5	1.92	N/A	N/A
Sample_67	Steere 28	Human	control	none	No	none	F	41	1.61	N/A	N/A
Sample_68	Steere 32	Human	control	none	No	none	F	32.5	1.51	N/A	N/A
Sample_69	Steere 34	Human	control	none	No	none	F	27.5	1.44	N/A	N/A
Sample_70	Steere 36	Human	control	none	No	none	F	51	1.71	N/A	N/A
Sample_71	Steere 38	Human	control	none	No	none	F	30.5	1.48	N/A	N/A
Sample_72	Steere 44	Human	control	none	No	none	F	370.5	2.57	N/A	N/A
Sample_73	Steere 45	Human	control	none	No	none	F	9.5	0.98	N/A	N/A
Sample_74	Steere 49	Human	control	none	No	none	F	293	2.47	N/A	N/A
Sample_75	Steere 5	Human	control	none	No	none	F	30	1.48	N/A	N/A
Sample_76	Steere 52	Human	control	none	No	none	F	250.5	2.4	N/A	N/A
Sample_77	Steere 53	Human	control	none	No	none	F	918.5	2.96	N/A	N/A
Sample_78	Steere 56	Human	control	none	No	none	F	80.5	1.91	N/A	N/A
Sample_79	Steere 59	Human	control	none	No	none	F	351	2.55	N/A	N/A
Sample_80	Steere 60	Human	control	none	No	none	F	907	2.96	N/A	N/A
Sample_81	27577 4	Peromyscus	infected	N/A	Yes	F	F	1449	3.16	8	1
Sample_82	27577 5	Peromyscus	infected	N/A	Yes	F	F	814.5	2.91	5	0
Sample_83	HB19 1	Peromyscus	infected	N/A	Yes	I	F	8330.5	3.92	20	1
Sample_84	HB19 2	Peromyscus	infected	N/A	Yes	I	F	9641.5	3.98	21	1
Sample_85	HB19 3	Peromyscus	infected	N/A	Yes	I	F	6577	3.82	19	1
Sample_86	HB19 4	Peromyscus	infected	N/A	Yes	I	F	2284	3.36	11	1
Sample_87	IDS 1	Peromyscus	infected	N/A	Yes	A and N	F	5807	3.76	17	1
Sample_88	IDS 2	Peromyscus	infected	N/A	Yes	A and N	F	46677.5	4.67	23	1
Sample_89	IDS 3	Peromyscus	infected	N/A	Yes	A and N	F	995	3	6	0
Sample_90	IDS 4	Peromyscus	infected	N/A	Yes	A and N	F	3193	3.5	13	1
Sample_91	IDS 5	Peromyscus	infected	N/A	Yes	A and N	F	647.5	2.81	4	0
Sample_92	SH2 1	Peromyscus	infected	N/A	Yes	K	F	2655	3.42	12	1
Sample_93	SH2 3	Peromyscus	infected	N/A	Yes	K	F	10474.5	4.02	22	1
Sample_94	SH2 4	Peromyscus	infected	N/A	Yes	K	F	370.5	2.57	1	0
Sample_95	TBO2 1	Peromyscus	infected	N/A	Yes	N	F	1947	3.29	10	1
Sample_96	TBO2 2	Peromyscus	infected	N/A	Yes	N	F	470.5	2.67	2	0
Sample_97	TBO2 3	Peromyscus	infected	N/A	Yes	N	F	1330	3.12	7	1
Sample_98	TBO2 4	Peromyscus	infected	N/A	Yes	N	F	5830	3.77	18	1
Sample_99	TBO2 5	Peromyscus	infected	N/A	Yes	N	F	622.5	2.79	3	0
Sample_100	WQR 1	Peromyscus	infected	N/A	Yes	T	F	4806	3.68	15	1
Sample_101	WQR 2	Peromyscus	infected	N/A	Yes	T	F	5051.5	3.7	16	1
Sample_102	WQR 3	Peromyscus	infected	N/A	Yes	T	F	1700	3.23	9	1
Sample_103	WQR 5	Peromyscus	infected	N/A	Yes	T	F	3478.5	3.54	14	1
Sample_104	NAIVE 1	Peromyscus	control	N/A	No	none	F	506.5	2.7	N/A	N/A
Sample_105	NAIVE 2	Peromyscus	control	N/A	No	none	F	1	0	N/A	N/A
Sample_106	NAIVE 3	Peromyscus	control	N/A	No	none	F	120.5	2.08	N/A	N/A
Sample_107	NAIVE 4	Peromyscus	control	N/A	No	none	F	344.5	2.54	N/A	N/A
Sample_108	NAIVE 5	Peromyscus	control	N/A	No	none	F	95	1.98	N/A	N/A
Sample_109	NAIVE 6	Peromyscus	control	N/A	No	none	F	65	1.81	N/A	N/A
Sample_110	NAIVE 7	Peromyscus	control	N/A	No	none	F	31	1.49	N/A	N/A
Sample_1	902111	Human	infected	Disseminated	Yes	unknown	F3	172	2.24	15	0
Sample_2	902436	Human	infected	Late	Yes	unknown	F3	61	1.79	6	0
Sample_3	902622	Human	infected	Disseminated	Yes	unknown	F3	4991	3.7	51	1
Sample_4	902668	Human	infected	Disseminated	Yes	unknown	F3	626	2.8	37	1
Sample_5	910531	Human	infected	Disseminated	Yes	unknown	F3	49	1.69	4	0
Sample_6	910532	Human	infected	Late	Yes	unknown	F3	46.5	1.67	3	0
Sample_7	910533	Human	infected	Late	Yes	unknown	F3	128.5	2.11	12	0
Sample_8	910544	Human	infected	Late	Yes	unknown	F3	783.5	2.89	39	1
Sample_9	910794	Human	infected	Late	Yes	unknown	F3	725.5	2.86	38	1
Sample_10	910900	Human	infected	Disseminated	Yes	unknown	F3	19397	4.29	52	1
Sample_11	910943	Human	infected	Late	Yes	unknown	F3	51.5	1.71	5	0
Sample_12	911104	Human	infected	Disseminated	Yes	unknown	F3	1177	3.07	43	1
Sample_13	911347	Human	infected	Early	Yes	unknown	F3	299.5	2.48	23	1
Sample_14	911348	Human	infected	Early	Yes	unknown	F3	42972	4.63	55	1
Sample_15	911349	Human	infected	Early	Yes	unknown	F3	1008.5	3	40	1
Sample_16	911350	Human	infected	Early	Yes	unknown	F3	172.5	2.24	16	0
Sample_17	911351	Human	infected	Early	Yes	unknown	F3	3396	3.53	50	1
Sample_18	911353	Human	infected	Early	Yes	unknown	F3	410.5	2.61	28	1
Sample_19	911841	Human	infected	Early	Yes	unknown	F3	62.5	1.8	7.5	0
Sample_20	911844	Human	infected	Early	Yes	unknown	F3	2121.5	3.33	46	1
Sample_21	911847	Human	infected	Early	Yes	unknown	F3	1489.5	3.17	45	1
Sample_22	920057	Human	infected	Late	Yes	unknown	F3	62.5	1.8	7.5	0
Sample_23	921982	Human	infected	Early	Yes	unknown	F3	2471.5	3.39	47	1
Sample_24	930206	Human	infected	Early	Yes	unknown	F3	593	2.77	33	1
Sample_25	931414	Human	infected	Early	Yes	unknown	F3	1253.5	3.1	44	1
Sample_26	940357	Human	infected	Disseminated	Yes	unknown	F3	312.5	2.49	26	1
Sample_27	940880	Human	infected	Late	Yes	unknown	F3	35553.5	4.55	54	1
Sample_28	Steere 12	Human	infected	Lyme Arthritis	Yes	unknown	F3	615.5	2.79	35	1
Sample_29	Steere 13	Human	infected	Disseminated or Late	Yes	unknown	F3	303.5	2.48	24.5	1
Sample_30	Steere 17	Human	infected	Disseminated or Late	Yes	unknown	F3	622.5	2.79	36	1
Sample_31	Steere 18	Human	infected	Lyme Arthritis	Yes	unknown	F3	1072	3.03	41	1
Sample_32	Steere 20	Human	infected	Lyme Arthritis	Yes	unknown	F3	185	2.27	18	1
Sample_33	Steere 21	Human	infected	Disseminated or Late	Yes	unknown	F3	498	2.7	31	1
Sample_34	Steere 22	Human	infected	Lyme Arthritis	Yes	unknown	F3	332.5	2.52	27	1
Sample_35	Steere 24	Human	infected	Disseminated or Late	Yes	unknown	F3	237.5	2.38	19	1
Sample_36	Steere 25	Human	infected	Lyme Arthritis	Yes	unknown	F3	133.5	2.13	13	0
Sample_37	Steere 27	Human	infected	Lyme Arthritis	Yes	unknown	F3	63.5	1.8	9	0
Sample_38	Steere 3	Human	infected	Lyme Arthritis	Yes	unknown	F3	112	2.05	11	0
Sample_39	Steere 30	Human	infected	Disseminated or Late	Yes	unknown	F3	103	2.01	10	0
Sample_40	Steere 31	Human	infected	Lyme Arthritis	Yes	unknown	F3	260	2.41	20	1
Sample_41	Steere 33	Human	infected	Disseminated or Late	Yes	unknown	F3	269.5	2.43	21	1
Sample_42	Steere 35	Human	infected	Lyme Arthritis	Yes	unknown	F3	597.5	2.78	34	1
Sample_43	Steere 37	Human	infected	Disseminated or Late	Yes	unknown	F3	34.5	1.54	2	0
Sample_44	Steere 39	Human	infected	Lyme Arthritis	Yes	unknown	F3	484	2.68	30	1
Sample_45	Steere 41	Human	infected	Lyme Arthritis	Yes	unknown	F3	289	2.46	22	1
Sample_46	Steere 42	Human	infected	Disseminated or Late	Yes	unknown	F3	1123.5	3.05	42	1
Sample_47	Steere 43	Human	infected	Disseminated or Late	Yes	unknown	F3	512	2.71	32	1
Sample_48	Steere 46	Human	infected	Lyme Arthritis	Yes	unknown	F3	26.5	1.42	1	0
Sample_49	Steere 47	Human	infected	Lyme Arthritis	Yes	unknown	F3	303.5	2.48	24.5	1
Sample_50	Steere 50	Human	infected	Lyme Arthritis	Yes	unknown	F3	450.5	2.65	29	1
Sample_51	Steere 54	Human	infected	Lyme Arthritis	Yes	unknown	F3	28884.5	4.46	53	1
Sample_52	Steere 57	Human	infected	Lyme Arthritis	Yes	unknown	F3	174.5	2.24	17	0
Sample_53	Steere 58	Human	infected	Disseminated or Late	Yes	unknown	F3	2836.5	3.45	48	1
Sample_54	Steere 6	Human	infected	Lyme Arthritis	Yes	unknown	F3	2866.5	3.46	49	1
Sample_55	Steere 8	Human	infected	Lyme Arthritis	Yes	unknown	F3	139	2.14	14	0
Sample_56	900874	Human	control	none	No	none	F3	64	1.81	N/A	N/A
Sample_57	900875	Human	control	none	No	none	F3	64	1.81	N/A	N/A
Sample_58	900876	Human	control	none	No	none	F3	23	1.36	N/A	N/A
Sample_59	900877	Human	control	none	No	none	F3	53.5	1.73	N/A	N/A
Sample_60	900878	Human	control	none	No	none	F3	57.5	1.76	N/A	N/A
Sample_61	Steere 10	Human	control	none	No	none	F3	88	1.94	N/A	N/A
Sample_62	Steere 11	Human	control	none	No	none	F3	45.5	1.66	N/A	N/A
Sample_63	Steere 14	Human	control	none	No	none	F3	18.5	1.27	N/A	N/A
Sample_64	Steere 19	Human	control	none	No	none	F3	1	0	N/A	N/A
Sample_65	Steere 2	Human	control	none	No	none	F3	36.5	1.56	N/A	N/A
Sample_66	Steere 23	Human	control	none	No	none	F3	41	1.61	N/A	N/A
Sample_67	Steere 28	Human	control	none	No	none	F3	43.5	1.64	N/A	N/A
Sample_68	Steere 32	Human	control	none	No	none	F3	5.5	0.74	N/A	N/A
Sample_69	Steere 34	Human	control	none	No	none	F3	41.5	1.62	N/A	N/A
Sample_70	Steere 36	Human	control	none	No	none	F3	24.5	1.39	N/A	N/A
Sample_71	Steere 38	Human	control	none	No	none	F3	18	1.26	N/A	N/A
Sample_72	Steere 44	Human	control	none	No	none	F3	77.5	1.89	N/A	N/A
Sample_73	Steere 45	Human	control	none	No	none	F3	15	1.18	N/A	N/A
Sample_74	Steere 49	Human	control	none	No	none	F3	87.5	1.94	N/A	N/A
Sample_75	Steere 5	Human	control	none	No	none	F3	17	1.23	N/A	N/A
Sample_76	Steere 52	Human	control	none	No	none	F3	83.5	1.92	N/A	N/A
Sample_77	Steere 53	Human	control	none	No	none	F3	1938	3.29	N/A	N/A
Sample_78	Steere 56	Human	control	none	No	none	F3	52	1.72	N/A	N/A
Sample_79	Steere 59	Human	control	none	No	none	F3	82.5	1.92	N/A	N/A
Sample_80	Steere 60	Human	control	none	No	none	F3	110	2.04	N/A	N/A
Sample_81	27577 4	Peromyscus	infected	N/A	Yes	F	F3	2519	3.4	12	1
Sample_82	27577 5	Peromyscus	infected	N/A	Yes	F	F3	867	2.94	5	0
Sample_83	HB19 1	Peromyscus	infected	N/A	Yes	I	F3	13211	4.12	21	1
Sample_84	HB19 2	Peromyscus	infected	N/A	Yes	I	F3	1	0	1	0
Sample_85	HB19 3	Peromyscus	infected	N/A	Yes	I	F3	1403.5	3.15	7	1
Sample_86	HB19 4	Peromyscus	infected	N/A	Yes	I	F3	2945.5	3.47	14	1
Sample_87	IDS 1	Peromyscus	infected	N/A	Yes	A and N	F3	6644.5	3.82	18	1
Sample_88	IDS 2	Peromyscus	infected	N/A	Yes	A and N	F3	56362	4.75	23	1
Sample_89	IDS 3	Peromyscus	infected	N/A	Yes	A and N	F3	786	2.9	3	0
Sample_90	IDS 4	Peromyscus	infected	N/A	Yes	A and N	F3	5352.5	3.73	17	1
Sample_91	IDS 5	Peromyscus	infected	N/A	Yes	A and N	F3	1908	3.28	9	1
Sample_92	SH2 1	Peromyscus	infected	N/A	Yes	K	F3	1990.5	3.3	10	1
Sample_93	SH2 3	Peromyscus	infected	N/A	Yes	K	F3	16765	4.22	22	1
Sample_94	SH2 4	Peromyscus	infected	N/A	Yes	K	F3	670.5	2.83	2	0
Sample_95	TBO2 1	Peromyscus	infected	N/A	Yes	N	F3	2757	3.44	13	1
Sample_96	TBO2 2	Peromyscus	infected	N/A	Yes	N	F3	925	2.97	6	0
Sample_97	TBO2 3	Peromyscus	infected	N/A	Yes	N	F3	3526.5	3.55	15	1
Sample_98	TBO2 4	Peromyscus	infected	N/A	Yes	N	F3	10776	4.03	20	1
Sample_99	TBO2 5	Peromyscus	infected	N/A	Yes	N	F3	825	2.92	4	0
Sample_100	WQR 1	Peromyscus	infected	N/A	Yes	T	F3	2037.5	3.31	11	1
Sample_101	WQR 2	Peromyscus	infected	N/A	Yes	T	F3	9610	3.98	19	1
Sample_102	WQR 3	Peromyscus	infected	N/A	Yes	T	F3	1433.5	3.16	8	1
Sample_103	WQR 5	Peromyscus	infected	N/A	Yes	T	F3	4075.5	3.61	16	1
Sample_104	NAIVE 1	Peromyscus	control	N/A	No	none	F3	257	2.41	N/A	N/A
Sample_105	NAIVE 2	Peromyscus	control	N/A	No	none	F3	1	0	N/A	N/A
Sample_106	NAIVE 3	Peromyscus	control	N/A	No	none	F3	256.5	2.41	N/A	N/A
Sample_107	NAIVE 4	Peromyscus	control	N/A	No	none	F3	891.5	2.95	N/A	N/A
Sample_108	NAIVE 5	Peromyscus	control	N/A	No	none	F3	79.5	1.9	N/A	N/A
Sample_109	NAIVE 6	Peromyscus	control	N/A	No	none	F3	1	0	N/A	N/A
Sample_110	NAIVE 7	Peromyscus	control	N/A	No	none	F3	117	2.07	N/A	N/A
Sample_1	902111	Human	infected	Disseminated	Yes	unknown	G	258	2.41	47	1
Sample_2	902436	Human	infected	Late	Yes	unknown	G	61.5	1.79	21	0
Sample_3	902622	Human	infected	Disseminated	Yes	unknown	G	504	2.7	50	1
Sample_4	902668	Human	infected	Disseminated	Yes	unknown	G	147.5	2.17	41	0
Sample_5	910531	Human	infected	Disseminated	Yes	unknown	G	92.5	1.97	29	0
Sample_6	910532	Human	infected	Late	Yes	unknown	G	126	2.1	39	0
Sample_7	910533	Human	infected	Late	Yes	unknown	G	31	1.49	10	0
Sample_8	910544	Human	infected	Late	Yes	unknown	G	102.5	2.01	31	0
Sample_9	910794	Human	infected	Late	Yes	unknown	G	28	1.45	8	0
Sample_10	910900	Human	infected	Disseminated	Yes	unknown	G	3128.5	3.5	55	1
Sample_11	910943	Human	infected	Late	Yes	unknown	G	43	1.63	15	0
Sample_12	911104	Human	infected	Disseminated	Yes	unknown	G	104.5	2.02	32	0
Sample_13	911347	Human	infected	Early	Yes	unknown	G	110.5	2.04	35	0
Sample_14	911348	Human	infected	Early	Yes	unknown	G	892.5	2.95	52	1
Sample_15	911349	Human	infected	Early	Yes	unknown	G	62.5	1.8	22	0
Sample_16	911350	Human	infected	Early	Yes	unknown	G	234.5	2.37	45	1
Sample_17	911351	Human	infected	Early	Yes	unknown	G	289	2.46	49	1
Sample_18	911353	Human	infected	Early	Yes	unknown	G	17.5	1.24	6	0
Sample_19	911841	Human	infected	Early	Yes	unknown	G	7	0.85	4	0
Sample_20	911844	Human	infected	Early	Yes	unknown	G	124	2.09	37	0
Sample_21	911847	Human	infected	Early	Yes	unknown	G	106	2.03	33	0
Sample_22	920057	Human	infected	Late	Yes	unknown	G	44	1.64	16	0
Sample_23	921982	Human	infected	Early	Yes	unknown	G	79	1.9	26	0
Sample_24	930206	Human	infected	Early	Yes	unknown	G	243	2.39	46	1
Sample_25	931414	Human	infected	Early	Yes	unknown	G	107	2.03	34	0
Sample_26	940357	Human	infected	Disseminated	Yes	unknown	G	79.5	1.9	27	0
Sample_27	940880	Human	infected	Late	Yes	unknown	G	2054	3.31	53	1
Sample_28	Steere 12	Human	infected	Lyme Arthritis	Yes	unknown	G	47	1.67	17.5	0
Sample_29	Steere 13	Human	infected	Disseminated or Late	Yes	unknown	G	1	0	1.5	0
Sample_30	Steere 17	Human	infected	Disseminated or Late	Yes	unknown	G	31.5	1.5	11	0
Sample_31	Steere 18	Human	infected	Lyme Arthritis	Yes	unknown	G	279.5	2.45	48	1
Sample_32	Steere 20	Human	infected	Lyme Arthritis	Yes	unknown	G	75.5	1.88	25	0
Sample_33	Steere 21	Human	infected	Disseminated or Late	Yes	unknown	G	10	1	5	0
Sample_34	Steere 22	Human	infected	Lyme Arthritis	Yes	unknown	G	47	1.67	17.5	0
Sample_35	Steere 24	Human	infected	Disseminated or Late	Yes	unknown	G	67	1.83	23	0
Sample_36	Steere 25	Human	infected	Lyme Arthritis	Yes	unknown	G	58.5	1.77	20	0
Sample_37	Steere 27	Human	infected	Lyme Arthritis	Yes	unknown	G	40.5	1.61	14	0
Sample_38	Steere 3	Human	infected	Lyme Arthritis	Yes	unknown	G	33	1.52	12	0
Sample_39	Steere 30	Human	infected	Disseminated or Late	Yes	unknown	G	37.5	1.57	13	0
Sample_40	Steere 31	Human	infected	Lyme Arthritis	Yes	unknown	G	30.5	1.48	9	0
Sample_41	Steere 33	Human	infected	Disseminated or Late	Yes	unknown	G	73	1.86	24	0
Sample_42	Steere 35	Human	infected	Lyme Arthritis	Yes	unknown	G	147	2.17	40	0
Sample_43	Steere 37	Human	infected	Disseminated or Late	Yes	unknown	G	1	0	1.5	0
Sample_44	Steere 39	Human	infected	Lyme Arthritis	Yes	unknown	G	19	1.28	7	0
Sample_45	Steere 41	Human	infected	Lyme Arthritis	Yes	unknown	G	125	2.1	38	0
Sample_46	Steere 42	Human	infected	Disseminated or Late	Yes	unknown	G	84	1.92	28	0
Sample_47	Steere 43	Human	infected	Disseminated or Late	Yes	unknown	G	111	2.05	36	0
Sample_48	Steere 46	Human	infected	Lyme Arthritis	Yes	unknown	G	773	2.89	51	1
Sample_49	Steere 47	Human	infected	Lyme Arthritis	Yes	unknown	G	6.5	0.81	3	0
Sample_50	Steere 50	Human	infected	Lyme Arthritis	Yes	unknown	G	212.5	2.33	44	1
Sample_51	Steere 54	Human	infected	Lyme Arthritis	Yes	unknown	G	2341	3.37	54	1
Sample_52	Steere 57	Human	infected	Lyme Arthritis	Yes	unknown	G	211	2.32	43	1
Sample_53	Steere 58	Human	infected	Disseminated or Late	Yes	unknown	G	176	2.25	42	1
Sample_54	Steere 6	Human	infected	Lyme Arthritis	Yes	unknown	G	100.5	2	30	0
Sample_55	Steere 8	Human	infected	Lyme Arthritis	Yes	unknown	G	55	1.74	19	0
Sample_56	900874	Human	control	none	No	none	G	68	1.83	N/A	N/A
Sample_57	900875	Human	control	none	No	none	G	137.5	2.14	N/A	N/A
Sample_58	900876	Human	control	none	No	none	G	7	0.85	N/A	N/A
Sample_59	900877	Human	control	none	No	none	G	14.5	1.16	N/A	N/A
Sample_60	900878	Human	control	none	No	none	G	129.5	2.11	N/A	N/A
Sample_61	Steere 10	Human	control	none	No	none	G	49.5	1.69	N/A	N/A
Sample_62	Steere 11	Human	control	none	No	none	G	25	1.4	N/A	N/A
Sample_63	Steere 14	Human	control	none	No	none	G	16.5	1.22	N/A	N/A
Sample_64	Steere 19	Human	control	none	No	none	G	1	0	N/A	N/A
Sample_65	Steere 2	Human	control	none	No	none	G	47	1.67	N/A	N/A
Sample_66	Steere 23	Human	control	none	No	none	G	71.5	1.85	N/A	N/A
Sample_67	Steere 28	Human	control	none	No	none	G	49	1.69	N/A	N/A
Sample_68	Steere 32	Human	control	none	No	none	G	1	0	N/A	N/A
Sample_69	Steere 34	Human	control	none	No	none	G	36	1.56	N/A	N/A
Sample_70	Steere 36	Human	control	none	No	none	G	36.5	1.56	N/A	N/A
Sample_71	Steere 38	Human	control	none	No	none	G	18	1.26	N/A	N/A
Sample_72	Steere 44	Human	control	none	No	none	G	1	0	N/A	N/A
Sample_73	Steere 45	Human	control	none	No	none	G	5	0.7	N/A	N/A
Sample_74	Steere 49	Human	control	none	No	none	G	46.5	1.67	N/A	N/A
Sample_75	Steere 5	Human	control	none	No	none	G	1	0	N/A	N/A
Sample_76	Steere 52	Human	control	none	No	none	G	11.5	1.06	N/A	N/A
Sample_77	Steere 53	Human	control	none	No	none	G	1	0	N/A	N/A
Sample_78	Steere 56	Human	control	none	No	none	G	1	0	N/A	N/A
Sample_79	Steere 59	Human	control	none	No	none	G	25	1.4	N/A	N/A
Sample_80	Steere 60	Human	control	none	No	none	G	60.5	1.78	N/A	N/A
Sample_81	27577 4	Peromyscus	infected	N/A	Yes	F	G	519.5	2.72	14	0
Sample_82	27577 5	Peromyscus	infected	N/A	Yes	F	G	322	2.51	12	0
Sample_83	HB19 1	Peromyscus	infected	N/A	Yes	I	G	319	2.5	11	0
Sample_84	HB19 2	Peromyscus	infected	N/A	Yes	I	G	3662.5	3.56	22	1
Sample_85	HB19 3	Peromyscus	infected	N/A	Yes	I	G	576.5	2.76	15	0
Sample_86	HB19 4	Peromyscus	infected	N/A	Yes	I	G	147.5	2.17	7	0
Sample_87	IDS 1	Peromyscus	infected	N/A	Yes	A and N	G	851	2.93	18	0
Sample_88	IDS 2	Peromyscus	infected	N/A	Yes	A and N	G	8914.5	3.95	23	1
Sample_89	IDS 3	Peromyscus	infected	N/A	Yes	A and N	G	115	2.06	6	0
Sample_90	IDS 4	Peromyscus	infected	N/A	Yes	A and N	G	1749	3.24	20	1
Sample_91	IDS 5	Peromyscus	infected	N/A	Yes	A and N	G	18	1.26	3	0
Sample_92	SH2 1	Peromyscus	infected	N/A	Yes	K	G	71	1.85	4	0
Sample_93	SH2 3	Peromyscus	infected	N/A	Yes	K	G	267	2.43	8	0
Sample_94	SH2 4	Peromyscus	infected	N/A	Yes	K	G	1	0	1	0
Sample_95	TBO2 1	Peromyscus	infected	N/A	Yes	N	G	797	2.9	17	0
Sample_96	TBO2 2	Peromyscus	infected	N/A	Yes	N	G	434	2.64	13	0
Sample_97	TBO2 3	Peromyscus	infected	N/A	Yes	N	G	703.5	2.85	16	0
Sample_98	TBO2 4	Peromyscus	infected	N/A	Yes	N	G	2954	3.47	21	1
Sample_99	TBO2 5	Peromyscus	infected	N/A	Yes	N	G	280	2.45	9	0
Sample_100	WQR 1	Peromyscus	infected	N/A	Yes	T	G	293.5	2.47	10	0
Sample_101	WQR 2	Peromyscus	infected	N/A	Yes	T	G	1004	3	19	0
Sample_102	WQR 3	Peromyscus	infected	N/A	Yes	T	G	72	1.86	5	0
Sample_103	WQR 5	Peromyscus	infected	N/A	Yes	T	G	12.5	1.1	2	0
Sample_104	NAIVE 1	Peromyscus	control	N/A	No	none	G	95	1.98	N/A	N/A
Sample_105	NAIVE 2	Peromyscus	control	N/A	No	none	G	1	0	N/A	N/A
Sample_106	NAIVE 3	Peromyscus	control	N/A	No	none	G	1	0	N/A	N/A
Sample_107	NAIVE 4	Peromyscus	control	N/A	No	none	G	1	0	N/A	N/A
Sample_108	NAIVE 5	Peromyscus	control	N/A	No	none	G	33.5	1.53	N/A	N/A
Sample_109	NAIVE 6	Peromyscus	control	N/A	No	none	G	1	0	N/A	N/A
Sample_110	NAIVE 7	Peromyscus	control	N/A	No	none	G	8	0.9	N/A	N/A
Sample_1	902111	Human	infected	Disseminated	Yes	unknown	H	237	2.37	39	1
Sample_2	902436	Human	infected	Late	Yes	unknown	H	97	1.99	18	0
Sample_3	902622	Human	infected	Disseminated	Yes	unknown	H	636	2.8	46	1
Sample_4	902668	Human	infected	Disseminated	Yes	unknown	H	190	2.28	33.5	1
Sample_5	910531	Human	infected	Disseminated	Yes	unknown	H	126.5	2.1	23	0
Sample_6	910532	Human	infected	Late	Yes	unknown	H	72	1.86	12	0
Sample_7	910533	Human	infected	Late	Yes	unknown	H	97.5	1.99	19	0
Sample_8	910544	Human	infected	Late	Yes	unknown	H	217	2.34	37	1
Sample_9	910794	Human	infected	Late	Yes	unknown	H	204.5	2.31	36	1
Sample_10	910900	Human	infected	Disseminated	Yes	unknown	H	5479	3.74	52	1
Sample_11	910943	Human	infected	Late	Yes	unknown	H	55.5	1.74	6.5	0
Sample_12	911104	Human	infected	Disseminated	Yes	unknown	H	121.5	2.08	22	0
Sample_13	911347	Human	infected	Early	Yes	unknown	H	153.5	2.19	26	0
Sample_14	911348	Human	infected	Early	Yes	unknown	H	6766.5	3.83	53	1
Sample_15	911349	Human	infected	Early	Yes	unknown	H	190	2.28	33.5	1
Sample_16	911350	Human	infected	Early	Yes	unknown	H	132.5	2.12	25	0
Sample_17	911351	Human	infected	Early	Yes	unknown	H	944	2.97	48	1
Sample_18	911353	Human	infected	Early	Yes	unknown	H	96.5	1.98	16.5	0
Sample_19	911841	Human	infected	Early	Yes	unknown	H	32	1.51	1	0
Sample_20	911844	Human	infected	Early	Yes	unknown	H	663	2.82	47	1
Sample_21	911847	Human	infected	Early	Yes	unknown	H	232.5	2.37	38	1
Sample_22	920057	Human	infected	Late	Yes	unknown	H	64.5	1.81	11	0
Sample_23	921982	Human	infected	Early	Yes	unknown	H	1650	3.22	50	1
Sample_24	930206	Human	infected	Early	Yes	unknown	H	334	2.52	42	1
Sample_25	931414	Human	infected	Early	Yes	unknown	H	311	2.49	41	1
Sample_26	940357	Human	infected	Disseminated	Yes	unknown	H	159	2.2	27.5	0
Sample_27	940880	Human	infected	Late	Yes	unknown	H	9702	3.99	54	1
Sample_28	Steere 12	Human	infected	Lyme Arthritis	Yes	unknown	H	245	2.39	40	1
Sample_29	Steere 13	Human	infected	Disseminated or Late	Yes	unknown	H	64	1.81	10	0
Sample_30	Steere 17	Human	infected	Disseminated or Late	Yes	unknown	H	83.5	1.92	13	0
Sample_31	Steere 18	Human	infected	Lyme Arthritis	Yes	unknown	H	336	2.53	43	1
Sample_32	Steere 20	Human	infected	Lyme Arthritis	Yes	unknown	H	107	2.03	21	0
Sample_33	Steere 21	Human	infected	Disseminated or Late	Yes	unknown	H	172.5	2.24	30	0
Sample_34	Steere 22	Human	infected	Lyme Arthritis	Yes	unknown	H	98	1.99	20	0
Sample_35	Steere 24	Human	infected	Disseminated or Late	Yes	unknown	H	96.5	1.98	16.5	0
Sample_36	Steere 25	Human	infected	Lyme Arthritis	Yes	unknown	H	55.5	1.74	6.5	0
Sample_37	Steere 27	Human	infected	Lyme Arthritis	Yes	unknown	H	61	1.79	9	0
Sample_38	Steere 3	Human	infected	Lyme Arthritis	Yes	unknown	H	85.5	1.93	15	0
Sample_39	Steere 30	Human	infected	Disseminated or Late	Yes	unknown	H	37.5	1.57	3	0
Sample_40	Steere 31	Human	infected	Lyme Arthritis	Yes	unknown	H	478	2.68	44	1
Sample_41	Steere 33	Human	infected	Disseminated or Late	Yes	unknown	H	35.5	1.55	2	0
Sample_42	Steere 35	Human	infected	Lyme Arthritis	Yes	unknown	H	185.5	2.27	32	1
Sample_43	Steere 37	Human	infected	Disseminated or Late	Yes	unknown	H	59.5	1.77	8	0
Sample_44	Steere 39	Human	infected	Lyme Arthritis	Yes	unknown	H	131.5	2.12	24	0
Sample_45	Steere 41	Human	infected	Lyme Arthritis	Yes	unknown	H	170.5	2.23	29	0
Sample_46	Steere 42	Human	infected	Disseminated or Late	Yes	unknown	H	505	2.7	45	1
Sample_47	Steere 43	Human	infected	Disseminated or Late	Yes	unknown	H	177	2.25	31	1
Sample_48	Steere 46	Human	infected	Lyme Arthritis	Yes	unknown	H	38.5	1.59	4	0
Sample_49	Steere 47	Human	infected	Lyme Arthritis	Yes	unknown	H	45	1.65	5	0
Sample_50	Steere 50	Human	infected	Lyme Arthritis	Yes	unknown	H	201	2.3	35	1
Sample_51	Steere 54	Human	infected	Lyme Arthritis	Yes	unknown	H	34196	4.53	55	1
Sample_52	Steere 57	Human	infected	Lyme Arthritis	Yes	unknown	H	159	2.2	27.5	0
Sample_53	Steere 58	Human	infected	Disseminated or Late	Yes	unknown	H	1292.5	3.11	49	1
Sample_54	Steere 6	Human	infected	Lyme Arthritis	Yes	unknown	H	1675.5	3.22	51	1
Sample_55	Steere 8	Human	infected	Lyme Arthritis	Yes	unknown	H	85	1.93	14	0
Sample_56	900874	Human	control	none	No	none	H	80	1.9	N/A	N/A
Sample_57	900875	Human	control	none	No	none	H	114.5	2.06	N/A	N/A
Sample_58	900876	Human	control	none	No	none	H	29.5	1.47	N/A	N/A
Sample_59	900877	Human	control	none	No	none	H	48.5	1.69	N/A	N/A
Sample_60	900878	Human	control	none	No	none	H	219.5	2.34	N/A	N/A
Sample_61	Steere 10	Human	control	none	No	none	H	54.5	1.74	N/A	N/A
Sample_62	Steere 11	Human	control	none	No	none	H	38	1.58	N/A	N/A
Sample_63	Steere 14	Human	control	none	No	none	H	48.5	1.69	N/A	N/A
Sample_64	Steere 19	Human	control	none	No	none	H	1	0	N/A	N/A
Sample_65	Steere 2	Human	control	none	No	none	H	58	1.76	N/A	N/A
Sample_66	Steere 23	Human	control	none	No	none	H	106	2.03	N/A	N/A
Sample_67	Steere 28	Human	control	none	No	none	H	153.5	2.19	N/A	N/A
Sample_68	Steere 32	Human	control	none	No	none	H	26	1.41	N/A	N/A
Sample_69	Steere 34	Human	control	none	No	none	H	15.5	1.19	N/A	N/A
Sample_70	Steere 36	Human	control	none	No	none	H	35	1.54	N/A	N/A
Sample_71	Steere 38	Human	control	none	No	none	H	52.5	1.72	N/A	N/A
Sample_72	Steere 44	Human	control	none	No	none	H	21.5	1.33	N/A	N/A
Sample_73	Steere 45	Human	control	none	No	none	H	22.5	1.35	N/A	N/A
Sample_74	Steere 49	Human	control	none	No	none	H	52	1.72	N/A	N/A
Sample_75	Steere 5	Human	control	none	No	none	H	36	1.56	N/A	N/A
Sample_76	Steere 52	Human	control	none	No	none	H	37.5	1.57	N/A	N/A
Sample_77	Steere 53	Human	control	none	No	none	H	12.5	1.1	N/A	N/A
Sample_78	Steere 56	Human	control	none	No	none	H	25.5	1.41	N/A	N/A
Sample_79	Steere 59	Human	control	none	No	none	H	40	1.6	N/A	N/A
Sample_80	Steere 60	Human	control	none	No	none	H	75.5	1.88	N/A	N/A
Sample_81	27577 4	Peromyscus	infected	N/A	Yes	F	H	339.5	2.53	10	0
Sample_82	27577 5	Peromyscus	infected	N/A	Yes	F	H	394	2.6	11	0
Sample_83	HB19 1	Peromyscus	infected	N/A	Yes	I	H	3892	3.59	22	1
Sample_84	HB19 2	Peromyscus	infected	N/A	Yes	I	H	1	0	1.5	0
Sample_85	HB19 3	Peromyscus	infected	N/A	Yes	I	H	243.5	2.39	9	0
Sample_86	HB19 4	Peromyscus	infected	N/A	Yes	I	H	707	2.85	14	0
Sample_87	IDS 1	Peromyscus	infected	N/A	Yes	A and N	H	2020	3.31	20	1
Sample_88	IDS 2	Peromyscus	infected	N/A	Yes	A and N	H	30446.5	4.48	23	1
Sample_89	IDS 3	Peromyscus	infected	N/A	Yes	A and N	H	12.5	1.1	3	0
Sample_90	IDS 4	Peromyscus	infected	N/A	Yes	A and N	H	1215	3.08	17	1
Sample_91	IDS 5	Peromyscus	infected	N/A	Yes	A and N	H	185.5	2.27	6	0
Sample_92	SH2 1	Peromyscus	infected	N/A	Yes	K	H	194	2.29	7	0
Sample_93	SH2 3	Peromyscus	infected	N/A	Yes	K	H	2756	3.44	21	1
Sample_94	SH2 4	Peromyscus	infected	N/A	Yes	K	H	20.5	1.31	5	0
Sample_95	TBO2 1	Peromyscus	infected	N/A	Yes	N	H	806.5	2.91	15	0
Sample_96	TBO2 2	Peromyscus	infected	N/A	Yes	N	H	218	2.34	8	0
Sample_97	TBO2 3	Peromyscus	infected	N/A	Yes	N	H	924.5	2.97	16	0
Sample_98	TBO2 4	Peromyscus	infected	N/A	Yes	N	H	1844	3.27	19	1
Sample_99	TBO2 5	Peromyscus	infected	N/A	Yes	N	H	1	0	1.5	0
Sample_100	WQR 1	Peromyscus	infected	N/A	Yes	T	H	428.5	2.63	12	0
Sample_101	WQR 2	Peromyscus	infected	N/A	Yes	T	H	1221.5	3.09	18	1
Sample_102	WQR 3	Peromyscus	infected	N/A	Yes	T	H	13.5	1.13	4	0
Sample_103	WQR 5	Peromyscus	infected	N/A	Yes	T	H	486.5	2.69	13	0
Sample_104	NAIVE 1	Peromyscus	control	N/A	No	none	H	191.5	2.28	N/A	N/A
Sample_105	NAIVE 2	Peromyscus	control	N/A	No	none	H	1	0	N/A	N/A
Sample_106	NAIVE 3	Peromyscus	control	N/A	No	none	H	37.5	1.57	N/A	N/A
Sample_107	NAIVE 4	Peromyscus	control	N/A	No	none	H	84.5	1.93	N/A	N/A
Sample_108	NAIVE 5	Peromyscus	control	N/A	No	none	H	1	0	N/A	N/A
Sample_109	NAIVE 6	Peromyscus	control	N/A	No	none	H	23	1.36	N/A	N/A
Sample_110	NAIVE 7	Peromyscus	control	N/A	No	none	H	70.5	1.85	N/A	N/A
Sample_1	902111	Human	infected	Disseminated	Yes	unknown	H3	130	2.11	35	0
Sample_2	902436	Human	infected	Late	Yes	unknown	H3	34	1.53	12	0
Sample_3	902622	Human	infected	Disseminated	Yes	unknown	H3	1184.5	3.07	51	1
Sample_4	902668	Human	infected	Disseminated	Yes	unknown	H3	173.5	2.24	44	0
Sample_5	910531	Human	infected	Disseminated	Yes	unknown	H3	55	1.74	23	0
Sample_6	910532	Human	infected	Late	Yes	unknown	H3	48	1.68	20	0
Sample_7	910533	Human	infected	Late	Yes	unknown	H3	52.5	1.72	22	0
Sample_8	910544	Human	infected	Late	Yes	unknown	H3	140.5	2.15	38	0
Sample_9	910794	Human	infected	Late	Yes	unknown	H3	151.5	2.18	39	0
Sample_10	910900	Human	infected	Disseminated	Yes	unknown	H3	5665	3.75	54	1
Sample_11	910943	Human	infected	Late	Yes	unknown	H3	25	1.4	11	0
Sample_12	911104	Human	infected	Disseminated	Yes	unknown	H3	134	2.13	36	0
Sample_13	911347	Human	infected	Early	Yes	unknown	H3	159.5	2.2	42	0
Sample_14	911348	Human	infected	Early	Yes	unknown	H3	5120	3.71	52	1
Sample_15	911349	Human	infected	Early	Yes	unknown	H3	103	2.01	32	0
Sample_16	911350	Human	infected	Early	Yes	unknown	H3	156	2.19	40	0
Sample_17	911351	Human	infected	Early	Yes	unknown	H3	642	2.81	50	1
Sample_18	911353	Human	infected	Early	Yes	unknown	H3	38.5	1.59	15	0
Sample_19	911841	Human	infected	Early	Yes	unknown	H3	80.5	1.91	29	0
Sample_20	911844	Human	infected	Early	Yes	unknown	H3	307.5	2.49	48	1
Sample_21	911847	Human	infected	Early	Yes	unknown	H3	255	2.41	46	1
Sample_22	920057	Human	infected	Late	Yes	unknown	H3	1	0	2	0
Sample_23	921982	Human	infected	Early	Yes	unknown	H3	157.5	2.2	41	0
Sample_24	930206	Human	infected	Early	Yes	unknown	H3	160	2.2	43	0
Sample_25	931414	Human	infected	Early	Yes	unknown	H3	97	1.99	31	0
Sample_26	940357	Human	infected	Disseminated	Yes	unknown	H3	71	1.85	25	0
Sample_27	940880	Human	infected	Late	Yes	unknown	H3	5259	3.72	53	1
Sample_28	Steere 12	Human	infected	Lyme Arthritis	Yes	unknown	H3	85	1.93	30	0
Sample_29	Steere 13	Human	infected	Disseminated or Late	Yes	unknown	H3	37.5	1.57	13	0
Sample_30	Steere 17	Human	infected	Disseminated or Late	Yes	unknown	H3	47.5	1.68	19	0
Sample_31	Steere 18	Human	infected	Lyme Arthritis	Yes	unknown	H3	423.5	2.63	49	1
Sample_32	Steere 20	Human	infected	Lyme Arthritis	Yes	unknown	H3	39	1.59	16.5	0
Sample_33	Steere 21	Human	infected	Disseminated or Late	Yes	unknown	H3	38	1.58	14	0
Sample_34	Steere 22	Human	infected	Lyme Arthritis	Yes	unknown	H3	1.5	0.18	4	0
Sample_35	Steere 24	Human	infected	Disseminated or Late	Yes	unknown	H3	76	1.88	28	0
Sample_36	Steere 25	Human	infected	Lyme Arthritis	Yes	unknown	H3	46	1.66	18	0
Sample_37	Steere 27	Human	infected	Lyme Arthritis	Yes	unknown	H3	13	1.11	6	0
Sample_38	Steere 3	Human	infected	Lyme Arthritis	Yes	unknown	H3	1	0	2	0
Sample_39	Steere 30	Human	infected	Disseminated or Late	Yes	unknown	H3	15	1.18	7.5	0
Sample_40	Steere 31	Human	infected	Lyme Arthritis	Yes	unknown	H3	39	1.59	16.5	0
Sample_41	Steere 33	Human	infected	Disseminated or Late	Yes	unknown	H3	15	1.18	7.5	0
Sample_42	Steere 35	Human	infected	Lyme Arthritis	Yes	unknown	H3	71.5	1.85	26	0
Sample_43	Steere 37	Human	infected	Disseminated or Late	Yes	unknown	H3	1	0	2	0
Sample_44	Steere 39	Human	infected	Lyme Arthritis	Yes	unknown	H3	22	1.34	10	0
Sample_45	Steere 41	Human	infected	Lyme Arthritis	Yes	unknown	H3	136.5	2.14	37	0
Sample_46	Steere 42	Human	infected	Disseminated or Late	Yes	unknown	H3	120.5	2.08	34	0
Sample_47	Steere 43	Human	infected	Disseminated or Late	Yes	unknown	H3	72	1.86	27	0
Sample_48	Steere 46	Human	infected	Lyme Arthritis	Yes	unknown	H3	21	1.32	9	0
Sample_49	Steere 47	Human	infected	Lyme Arthritis	Yes	unknown	H3	9.5	0.98	5	0
Sample_50	Steere 50	Human	infected	Lyme Arthritis	Yes	unknown	H3	180	2.26	45	1
Sample_51	Steere 54	Human	infected	Lyme Arthritis	Yes	unknown	H3	6654	3.82	55	1
Sample_52	Steere 57	Human	infected	Lyme Arthritis	Yes	unknown	H3	119	2.08	33	0
Sample_53	Steere 58	Human	infected	Disseminated or Late	Yes	unknown	H3	295.5	2.47	47	1
Sample_54	Steere 6	Human	infected	Lyme Arthritis	Yes	unknown	H3	62.5	1.8	24	0
Sample_55	Steere 8	Human	infected	Lyme Arthritis	Yes	unknown	H3	51	1.71	21	0
Sample_56	900874	Human	control	none	No	none	H3	59.5	1.77	N/A	N/A
Sample_57	900875	Human	control	none	No	none	H3	63.5	1.8	N/A	N/A
Sample_58	900876	Human	control	none	No	none	H3	1	0	N/A	N/A
Sample_59	900877	Human	control	none	No	none	H3	28	1.45	N/A	N/A
Sample_60	900878	Human	control	none	No	none	H3	78.5	1.89	N/A	N/A
Sample_61	Steere 10	Human	control	none	No	none	H3	26	1.41	N/A	N/A
Sample_62	Steere 11	Human	control	none	No	none	H3	13.5	1.13	N/A	N/A
Sample_63	Steere 14	Human	control	none	No	none	H3	7.5	0.88	N/A	N/A
Sample_64	Steere 19	Human	control	none	No	none	H3	1	0	N/A	N/A
Sample_65	Steere 2	Human	control	none	No	none	H3	35.5	1.55	N/A	N/A
Sample_66	Steere 23	Human	control	none	No	none	H3	25	1.4	N/A	N/A
Sample_67	Steere 28	Human	control	none	No	none	H3	31	1.49	N/A	N/A
Sample_68	Steere 32	Human	control	none	No	none	H3	1	0	N/A	N/A
Sample_69	Steere 34	Human	control	none	No	none	H3	33	1.52	N/A	N/A
Sample_70	Steere 36	Human	control	none	No	none	H3	2	0.3	N/A	N/A
Sample_71	Steere 38	Human	control	none	No	none	H3	1.5	0.18	N/A	N/A
Sample_72	Steere 44	Human	control	none	No	none	H3	17.5	1.24	N/A	N/A
Sample_73	Steere 45	Human	control	none	No	none	H3	8	0.9	N/A	N/A
Sample_74	Steere 49	Human	control	none	No	none	H3	35	1.54	N/A	N/A
Sample_75	Steere 5	Human	control	none	No	none	H3	5.5	0.74	N/A	N/A
Sample_76	Steere 52	Human	control	none	No	none	H3	35.5	1.55	N/A	N/A
Sample_77	Steere 53	Human	control	none	No	none	H3	36	1.56	N/A	N/A
Sample_78	Steere 56	Human	control	none	No	none	H3	19	1.28	N/A	N/A
Sample_79	Steere 59	Human	control	none	No	none	H3	6	0.78	N/A	N/A
Sample_80	Steere 60	Human	control	none	No	none	H3	36	1.56	N/A	N/A
Sample_81	27577 4	Peromyscus	infected	N/A	Yes	F	H3	791	2.9	11	0
Sample_82	27577 5	Peromyscus	infected	N/A	Yes	F	H3	368.5	2.57	6	0
Sample_83	HB19 1	Peromyscus	infected	N/A	Yes	I	H3	4684.5	3.67	21	1
Sample_84	HB19 2	Peromyscus	infected	N/A	Yes	I	H3	8053	3.91	22	1
Sample_85	HB19 3	Peromyscus	infected	N/A	Yes	I	H3	2161	3.33	19	1
Sample_86	HB19 4	Peromyscus	infected	N/A	Yes	I	H3	1298.5	3.11	14	1
Sample_87	IDS 1	Peromyscus	infected	N/A	Yes	A and N	H3	1487.5	3.17	16	1
Sample_88	IDS 2	Peromyscus	infected	N/A	Yes	A and N	H3	22999.5	4.36	23	1
Sample_89	IDS 3	Peromyscus	infected	N/A	Yes	A and N	H3	260	2.41	3	0
Sample_90	IDS 4	Peromyscus	infected	N/A	Yes	A and N	H3	1490	3.17	17	1
Sample_91	IDS 5	Peromyscus	infected	N/A	Yes	A and N	H3	209.5	2.32	1	0
Sample_92	SH2 1	Peromyscus	infected	N/A	Yes	K	H3	236.5	2.37	2	0
Sample_93	SH2 3	Peromyscus	infected	N/A	Yes	K	H3	4102	3.61	20	1
Sample_94	SH2 4	Peromyscus	infected	N/A	Yes	K	H3	321.5	2.51	5	0
Sample_95	TBO2 1	Peromyscus	infected	N/A	Yes	N	H3	798	2.9	12	0
Sample_96	TBO2 2	Peromyscus	infected	N/A	Yes	N	H3	487.5	2.69	9	0
Sample_97	TBO2 3	Peromyscus	infected	N/A	Yes	N	H3	1330	3.12	15	1
Sample_98	TBO2 4	Peromyscus	infected	N/A	Yes	N	H3	981.5	2.99	13	0
Sample_99	TBO2 5	Peromyscus	infected	N/A	Yes	N	H3	484	2.68	8	0
Sample_100	WQR 1	Peromyscus	infected	N/A	Yes	T	H3	519	2.72	10	0
Sample_101	WQR 2	Peromyscus	infected	N/A	Yes	T	H3	1755.5	3.24	18	1
Sample_102	WQR 3	Peromyscus	infected	N/A	Yes	T	H3	409	2.61	7	0
Sample_103	WQR 5	Peromyscus	infected	N/A	Yes	T	H3	276.5	2.44	4	0
Sample_104	NAIVE 1	Peromyscus	control	N/A	No	none	H3	30.5	1.48	N/A	N/A
Sample_105	NAIVE 2	Peromyscus	control	N/A	No	none	H3	171	2.23	N/A	N/A
Sample_106	NAIVE 3	Peromyscus	control	N/A	No	none	H3	84	1.92	N/A	N/A
Sample_107	NAIVE 4	Peromyscus	control	N/A	No	none	H3	189	2.28	N/A	N/A
Sample_108	NAIVE 5	Peromyscus	control	N/A	No	none	H3	101.5	2.01	N/A	N/A
Sample_109	NAIVE 6	Peromyscus	control	N/A	No	none	H3	1	0	N/A	N/A
Sample_110	NAIVE 7	Peromyscus	control	N/A	No	none	H3	45.5	1.66	N/A	N/A
Sample_1	902111	Human	infected	Disseminated	Yes	unknown	I	562.5	2.75	39	1
Sample_2	902436	Human	infected	Late	Yes	unknown	I	784	2.89	42	1
Sample_3	902622	Human	infected	Disseminated	Yes	unknown	I	1886.5	3.28	48	1
Sample_4	902668	Human	infected	Disseminated	Yes	unknown	I	179	2.25	20	1
Sample_5	910531	Human	infected	Disseminated	Yes	unknown	I	240	2.38	27	1
Sample_6	910532	Human	infected	Late	Yes	unknown	I	61.5	1.79	3	0
Sample_7	910533	Human	infected	Late	Yes	unknown	I	159.5	2.2	18	0
Sample_8	910544	Human	infected	Late	Yes	unknown	I	281.5	2.45	30	1
Sample_9	910794	Human	infected	Late	Yes	unknown	I	303	2.48	31	1
Sample_10	910900	Human	infected	Disseminated	Yes	unknown	I	7738	3.89	52	1
Sample_11	910943	Human	infected	Late	Yes	unknown	I	1109.5	3.05	43	1
Sample_12	911104	Human	infected	Disseminated	Yes	unknown	I	325.5	2.51	33	1
Sample_13	911347	Human	infected	Early	Yes	unknown	I	191.5	2.28	21	1
Sample_14	911348	Human	infected	Early	Yes	unknown	I	15923	4.2	55	1
Sample_15	911349	Human	infected	Early	Yes	unknown	I	324.5	2.51	32	1
Sample_16	911350	Human	infected	Early	Yes	unknown	I	144.5	2.16	16	0
Sample_17	911351	Human	infected	Early	Yes	unknown	I	533	2.73	38	1
Sample_18	911353	Human	infected	Early	Yes	unknown	I	145	2.16	17	0
Sample_19	911841	Human	infected	Early	Yes	unknown	I	52	1.72	2	0
Sample_20	911844	Human	infected	Early	Yes	unknown	I	1418.5	3.15	44	1
Sample_21	911847	Human	infected	Early	Yes	unknown	I	360.5	2.56	34	1
Sample_22	920057	Human	infected	Late	Yes	unknown	I	89	1.95	9	0
Sample_23	921982	Human	infected	Early	Yes	unknown	I	393.5	2.59	36	1
Sample_24	930206	Human	infected	Early	Yes	unknown	I	597.5	2.78	41	1
Sample_25	931414	Human	infected	Early	Yes	unknown	I	3316.5	3.52	50	1
Sample_26	940357	Human	infected	Disseminated	Yes	unknown	I	223	2.35	24	1
Sample_27	940880	Human	infected	Late	Yes	unknown	I	10919	4.04	53	1
Sample_28	Steere 12	Human	infected	Lyme Arthritis	Yes	unknown	I	266.5	2.43	29	1
Sample_29	Steere 13	Human	infected	Disseminated or Late	Yes	unknown	I	82.5	1.92	6	0
Sample_30	Steere 17	Human	infected	Disseminated or Late	Yes	unknown	I	1504.5	3.18	45	1
Sample_31	Steere 18	Human	infected	Lyme Arthritis	Yes	unknown	I	593	2.77	40	1
Sample_32	Steere 20	Human	infected	Lyme Arthritis	Yes	unknown	I	137.5	2.14	14	0
Sample_33	Steere 21	Human	infected	Disseminated or Late	Yes	unknown	I	168.5	2.23	19	0
Sample_34	Steere 22	Human	infected	Lyme Arthritis	Yes	unknown	I	85.5	1.93	8	0
Sample_35	Steere 24	Human	infected	Disseminated or Late	Yes	unknown	I	105	2.02	11	0
Sample_36	Steere 25	Human	infected	Lyme Arthritis	Yes	unknown	I	7248	3.86	51	1
Sample_37	Steere 27	Human	infected	Lyme Arthritis	Yes	unknown	I	83.5	1.92	7	0
Sample_38	Steere 3	Human	infected	Lyme Arthritis	Yes	unknown	I	70.5	1.85	5	0
Sample_39	Steere 30	Human	infected	Disseminated or Late	Yes	unknown	I	67.5	1.83	4	0
Sample_40	Steere 31	Human	infected	Lyme Arthritis	Yes	unknown	I	90	1.95	10	0
Sample_41	Steere 33	Human	infected	Disseminated or Late	Yes	unknown	I	126.5	2.1	13	0
Sample_42	Steere 35	Human	infected	Lyme Arthritis	Yes	unknown	I	265.5	2.42	28	1
Sample_43	Steere 37	Human	infected	Disseminated or Late	Yes	unknown	I	110.5	2.04	12	0
Sample_44	Steere 39	Human	infected	Lyme Arthritis	Yes	unknown	I	1628.5	3.21	47	1
Sample_45	Steere 41	Human	infected	Lyme Arthritis	Yes	unknown	I	218.5	2.34	22	1
Sample_46	Steere 42	Human	infected	Disseminated or Late	Yes	unknown	I	532	2.73	37	1
Sample_47	Steere 43	Human	infected	Disseminated or Late	Yes	unknown	I	224.5	2.35	25	1
Sample_48	Steere 46	Human	infected	Lyme Arthritis	Yes	unknown	I	50.5	1.7	1	0
Sample_49	Steere 47	Human	infected	Lyme Arthritis	Yes	unknown	I	219	2.34	23	1
Sample_50	Steere 50	Human	infected	Lyme Arthritis	Yes	unknown	I	382.5	2.58	35	1
Sample_51	Steere 54	Human	infected	Lyme Arthritis	Yes	unknown	I	11734.5	4.07	54	1
Sample_52	Steere 57	Human	infected	Lyme Arthritis	Yes	unknown	I	230.5	2.36	26	1
Sample_53	Steere 58	Human	infected	Disseminated or Late	Yes	unknown	I	2542	3.41	49	1
Sample_54	Steere 6	Human	infected	Lyme Arthritis	Yes	unknown	I	1589	3.2	46	1
Sample_55	Steere 8	Human	infected	Lyme Arthritis	Yes	unknown	I	143.5	2.16	15	0
Sample_56	900874	Human	control	none	No	none	I	92	1.96	N/A	N/A
Sample_57	900875	Human	control	none	No	none	I	86.5	1.94	N/A	N/A
Sample_58	900876	Human	control	none	No	none	I	68	1.83	N/A	N/A
Sample_59	900877	Human	control	none	No	none	I	61	1.79	N/A	N/A
Sample_60	900878	Human	control	none	No	none	I	212	2.33	N/A	N/A
Sample_61	Steere 10	Human	control	none	No	none	I	81.5	1.91	N/A	N/A
Sample_62	Steere 11	Human	control	none	No	none	I	81.5	1.91	N/A	N/A
Sample_63	Steere 14	Human	control	none	No	none	I	42.5	1.63	N/A	N/A
Sample_64	Steere 19	Human	control	none	No	none	I	81	1.91	N/A	N/A
Sample_65	Steere 2	Human	control	none	No	none	I	68	1.83	N/A	N/A
Sample_66	Steere 23	Human	control	none	No	none	I	72	1.86	N/A	N/A
Sample_67	Steere 28	Human	control	none	No	none	I	62	1.79	N/A	N/A
Sample_68	Steere 32	Human	control	none	No	none	I	25	1.4	N/A	N/A
Sample_69	Steere 34	Human	control	none	No	none	I	47.5	1.68	N/A	N/A
Sample_70	Steere 36	Human	control	none	No	none	I	110	2.04	N/A	N/A
Sample_71	Steere 38	Human	control	none	No	none	I	83.5	1.92	N/A	N/A
Sample_72	Steere 44	Human	control	none	No	none	I	109.5	2.04	N/A	N/A
Sample_73	Steere 45	Human	control	none	No	none	I	41.5	1.62	N/A	N/A
Sample_74	Steere 49	Human	control	none	No	none	I	127.5	2.11	N/A	N/A
Sample_75	Steere 5	Human	control	none	No	none	I	50	1.7	N/A	N/A
Sample_76	Steere 52	Human	control	none	No	none	I	56.5	1.75	N/A	N/A
Sample_77	Steere 53	Human	control	none	No	none	I	42	1.62	N/A	N/A
Sample_78	Steere 56	Human	control	none	No	none	I	27.5	1.44	N/A	N/A
Sample_79	Steere 59	Human	control	none	No	none	I	53.5	1.73	N/A	N/A
Sample_80	Steere 60	Human	control	none	No	none	I	130	2.11	N/A	N/A
Sample_81	27577 4	Peromyscus	infected	N/A	Yes	F	I	262.5	2.42	7	0
Sample_82	27577 5	Peromyscus	infected	N/A	Yes	F	I	319.5	2.5	8	0
Sample_83	HB19 1	Peromyscus	infected	N/A	Yes	I	I	7002.5	3.85	20	1
Sample_84	HB19 2	Peromyscus	infected	N/A	Yes	I	I	14462.5	4.16	22	1
Sample_85	HB19 3	Peromyscus	infected	N/A	Yes	I	I	12588	4.1	21	1
Sample_86	HB19 4	Peromyscus	infected	N/A	Yes	I	I	1855	3.27	15	1
Sample_87	IDS 1	Peromyscus	infected	N/A	Yes	A and N	I	3496.5	3.54	18	1
Sample_88	IDS 2	Peromyscus	infected	N/A	Yes	A and N	I	26381.5	4.42	23	1
Sample_89	IDS 3	Peromyscus	infected	N/A	Yes	A and N	I	233.5	2.37	6	0
Sample_90	IDS 4	Peromyscus	infected	N/A	Yes	A and N	I	2321.5	3.37	16	1
Sample_91	IDS 5	Peromyscus	infected	N/A	Yes	A and N	I	490.5	2.69	11	0
Sample_92	SH2 1	Peromyscus	infected	N/A	Yes	K	I	110.5	2.04	3	0
Sample_93	SH2 3	Peromyscus	infected	N/A	Yes	K	I	5898	3.77	19	1
Sample_94	SH2 4	Peromyscus	infected	N/A	Yes	K	I	172	2.24	4	0
Sample_95	TBO2 1	Peromyscus	infected	N/A	Yes	N	I	466.5	2.67	10	0
Sample_96	TBO2 2	Peromyscus	infected	N/A	Yes	N	I	106.5	2.03	2	0
Sample_97	TBO2 3	Peromyscus	infected	N/A	Yes	N	I	524	2.72	12	0
Sample_98	TBO2 4	Peromyscus	infected	N/A	Yes	N	I	2810.5	3.45	17	1
Sample_99	TBO2 5	Peromyscus	infected	N/A	Yes	N	I	223.5	2.35	5	0
Sample_100	WQR 1	Peromyscus	infected	N/A	Yes	T	I	1527.5	3.18	13	1
Sample_101	WQR 2	Peromyscus	infected	N/A	Yes	T	I	1662.5	3.22	14	1
Sample_102	WQR 3	Peromyscus	infected	N/A	Yes	T	I	439	2.64	9	0
Sample_103	WQR 5	Peromyscus	infected	N/A	Yes	T	I	95	1.98	1	0
Sample_104	NAIVE 1	Peromyscus	control	N/A	No	none	I	24	1.38	N/A	N/A
Sample_105	NAIVE 2	Peromyscus	control	N/A	No	none	I	1	0	N/A	N/A
Sample_106	NAIVE 3	Peromyscus	control	N/A	No	none	I	44.5	1.65	N/A	N/A
Sample_107	NAIVE 4	Peromyscus	control	N/A	No	none	I	119.5	2.08	N/A	N/A
Sample_108	NAIVE 5	Peromyscus	control	N/A	No	none	I	1	0	N/A	N/A
Sample_109	NAIVE 6	Peromyscus	control	N/A	No	none	I	1	0	N/A	N/A
Sample_110	NAIVE 7	Peromyscus	control	N/A	No	none	I	39.5	1.6	N/A	N/A
Sample_1	902111	Human	infected	Disseminated	Yes	unknown	I3	234	2.37	32	1
Sample_2	902436	Human	infected	Late	Yes	unknown	I3	42.5	1.63	8	0
Sample_3	902622	Human	infected	Disseminated	Yes	unknown	I3	1681	3.23	51	1
Sample_4	902668	Human	infected	Disseminated	Yes	unknown	I3	290	2.46	34	1
Sample_5	910531	Human	infected	Disseminated	Yes	unknown	I3	89.5	1.95	17	0
Sample_6	910532	Human	infected	Late	Yes	unknown	I3	59.5	1.77	9	0
Sample_7	910533	Human	infected	Late	Yes	unknown	I3	322.5	2.51	36	1
Sample_8	910544	Human	infected	Late	Yes	unknown	I3	1618.5	3.21	50	1
Sample_9	910794	Human	infected	Late	Yes	unknown	I3	409	2.61	40	1
Sample_10	910900	Human	infected	Disseminated	Yes	unknown	I3	7852	3.89	52	1
Sample_11	910943	Human	infected	Late	Yes	unknown	I3	70	1.85	10	0
Sample_12	911104	Human	infected	Disseminated	Yes	unknown	I3	224.5	2.35	29	1
Sample_13	911347	Human	infected	Early	Yes	unknown	I3	81	1.91	13	0
Sample_14	911348	Human	infected	Early	Yes	unknown	I3	47836	4.68	55	1
Sample_15	911349	Human	infected	Early	Yes	unknown	I3	1345	3.13	49	1
Sample_16	911350	Human	infected	Early	Yes	unknown	I3	94.5	1.98	18	0
Sample_17	911351	Human	infected	Early	Yes	unknown	I3	1160	3.06	47	1
Sample_18	911353	Human	infected	Early	Yes	unknown	I3	126	2.1	21	0
Sample_19	911841	Human	infected	Early	Yes	unknown	I3	14.5	1.16	2	0
Sample_20	911844	Human	infected	Early	Yes	unknown	I3	724.5	2.86	44	1
Sample_21	911847	Human	infected	Early	Yes	unknown	I3	474	2.68	41	1
Sample_22	920057	Human	infected	Late	Yes	unknown	I3	28.5	1.45	6	0
Sample_23	921982	Human	infected	Early	Yes	unknown	I3	347.5	2.54	37	1
Sample_24	930206	Human	infected	Early	Yes	unknown	I3	227.5	2.36	30	1
Sample_25	931414	Human	infected	Early	Yes	unknown	I3	784	2.89	45	1
Sample_26	940357	Human	infected	Disseminated	Yes	unknown	I3	150.5	2.18	22	0
Sample_27	940880	Human	infected	Late	Yes	unknown	I3	16196	4.21	53	1
Sample_28	Steere 12	Human	infected	Lyme Arthritis	Yes	unknown	I3	251.5	2.4	33	1
Sample_29	Steere 13	Human	infected	Disseminated or Late	Yes	unknown	I3	201.5	2.3	27	1
Sample_30	Steere 17	Human	infected	Disseminated or Late	Yes	unknown	I3	116.5	2.07	20	0
Sample_31	Steere 18	Human	infected	Lyme Arthritis	Yes	unknown	I3	551.5	2.74	42	1
Sample_32	Steere 20	Human	infected	Lyme Arthritis	Yes	unknown	I3	360.5	2.56	38	1
Sample_33	Steere 21	Human	infected	Disseminated or Late	Yes	unknown	I3	315	2.5	35	1
Sample_34	Steere 22	Human	infected	Lyme Arthritis	Yes	unknown	I3	20.5	1.31	4	0
Sample_35	Steere 24	Human	infected	Disseminated or Late	Yes	unknown	I3	105.5	2.02	19	0
Sample_36	Steere 25	Human	infected	Lyme Arthritis	Yes	unknown	I3	73.5	1.87	12	0
Sample_37	Steere 27	Human	infected	Lyme Arthritis	Yes	unknown	I3	28	1.45	5	0
Sample_38	Steere 3	Human	infected	Lyme Arthritis	Yes	unknown	I3	158.5	2.2	23	0
Sample_39	Steere 30	Human	infected	Disseminated or Late	Yes	unknown	I3	20	1.3	3	0
Sample_40	Steere 31	Human	infected	Lyme Arthritis	Yes	unknown	I3	82	1.91	15	0
Sample_41	Steere 33	Human	infected	Disseminated or Late	Yes	unknown	I3	84.5	1.93	16	0
Sample_42	Steere 35	Human	infected	Lyme Arthritis	Yes	unknown	I3	195	2.29	26	1
Sample_43	Steere 37	Human	infected	Disseminated or Late	Yes	unknown	I3	73	1.86	11	0
Sample_44	Steere 39	Human	infected	Lyme Arthritis	Yes	unknown	I3	1204.5	3.08	48	1
Sample_45	Steere 41	Human	infected	Lyme Arthritis	Yes	unknown	I3	213.5	2.33	28	1
Sample_46	Steere 42	Human	infected	Disseminated or Late	Yes	unknown	I3	997	3	46	1
Sample_47	Steere 43	Human	infected	Disseminated or Late	Yes	unknown	I3	231	2.36	31	1
Sample_48	Steere 46	Human	infected	Lyme Arthritis	Yes	unknown	I3	9	0.95	1	0
Sample_49	Steere 47	Human	infected	Lyme Arthritis	Yes	unknown	I3	37	1.57	7	0
Sample_50	Steere 50	Human	infected	Lyme Arthritis	Yes	unknown	I3	190	2.28	25	1
Sample_51	Steere 54	Human	infected	Lyme Arthritis	Yes	unknown	I3	16656.5	4.22	54	1
Sample_52	Steere 57	Human	infected	Lyme Arthritis	Yes	unknown	I3	169	2.23	24	0
Sample_53	Steere 58	Human	infected	Disseminated or Late	Yes	unknown	I3	557	2.75	43	1
Sample_54	Steere 6	Human	infected	Lyme Arthritis	Yes	unknown	I3	374.5	2.57	39	1
Sample_55	Steere 8	Human	infected	Lyme Arthritis	Yes	unknown	I3	81.5	1.91	14	0
Sample_56	900874	Human	control	none	No	none	I3	57	1.76	N/A	N/A
Sample_57	900875	Human	control	none	No	none	I3	97	1.99	N/A	N/A
Sample_58	900876	Human	control	none	No	none	I3	19	1.28	N/A	N/A
Sample_59	900877	Human	control	none	No	none	I3	9.5	0.98	N/A	N/A
Sample_60	900878	Human	control	none	No	none	I3	90.5	1.96	N/A	N/A
Sample_61	Steere 10	Human	control	none	No	none	I3	26	1.41	N/A	N/A
Sample_62	Steere 11	Human	control	none	No	none	I3	6	0.78	N/A	N/A
Sample_63	Steere 14	Human	control	none	No	none	I3	15	1.18	N/A	N/A
Sample_64	Steere 19	Human	control	none	No	none	I3	1	0	N/A	N/A
Sample_65	Steere 2	Human	control	none	No	none	I3	33	1.52	N/A	N/A
Sample_66	Steere 23	Human	control	none	No	none	I3	40	1.6	N/A	N/A
Sample_67	Steere 28	Human	control	none	No	none	I3	5	0.7	N/A	N/A
Sample_68	Steere 32	Human	control	none	No	none	I3	1	0	N/A	N/A
Sample_69	Steere 34	Human	control	none	No	none	I3	123.5	2.09	N/A	N/A
Sample_70	Steere 36	Human	control	none	No	none	I3	11	1.04	N/A	N/A
Sample_71	Steere 38	Human	control	none	No	none	I3	17.5	1.24	N/A	N/A
Sample_72	Steere 44	Human	control	none	No	none	I3	10.5	1.02	N/A	N/A
Sample_73	Steere 45	Human	control	none	No	none	I3	3.5	0.54	N/A	N/A
Sample_74	Steere 49	Human	control	none	No	none	I3	48.5	1.69	N/A	N/A
Sample_75	Steere 5	Human	control	none	No	none	I3	10.5	1.02	N/A	N/A
Sample_76	Steere 52	Human	control	none	No	none	I3	106.5	2.03	N/A	N/A
Sample_77	Steere 53	Human	control	none	No	none	I3	22	1.34	N/A	N/A
Sample_78	Steere 56	Human	control	none	No	none	I3	34	1.53	N/A	N/A
Sample_79	Steere 59	Human	control	none	No	none	I3	49	1.69	N/A	N/A
Sample_80	Steere 60	Human	control	none	No	none	I3	33.5	1.53	N/A	N/A
Sample_81	27577 4	Peromyscus	infected	N/A	Yes	F	I3	767.5	2.89	7	0
Sample_82	27577 5	Peromyscus	infected	N/A	Yes	F	I3	607	2.78	6	0
Sample_83	HB19 1	Peromyscus	infected	N/A	Yes	I	I3	7912.5	3.9	19	1
Sample_84	HB19 2	Peromyscus	infected	N/A	Yes	I	I3	1	0	1	0
Sample_85	HB19 3	Peromyscus	infected	N/A	Yes	I	I3	2433.5	3.39	14	1
Sample_86	HB19 4	Peromyscus	infected	N/A	Yes	I	I3	2248	3.35	13	1
Sample_87	IDS 1	Peromyscus	infected	N/A	Yes	A and N	I3	19824.5	4.3	22	1
Sample_88	IDS 2	Peromyscus	infected	N/A	Yes	A and N	I3	42813.5	4.63	23	1
Sample_89	IDS 3	Peromyscus	infected	N/A	Yes	A and N	I3	3760	3.58	16	1
Sample_90	IDS 4	Peromyscus	infected	N/A	Yes	A and N	I3	17516.5	4.24	21	1
Sample_91	IDS 5	Peromyscus	infected	N/A	Yes	A and N	I3	1823	3.26	12	1
Sample_92	SH2 1	Peromyscus	infected	N/A	Yes	K	I3	378.75	2.58	5	0
Sample_93	SH2 3	Peromyscus	infected	N/A	Yes	K	I3	5915.5	3.77	18	1
Sample_94	SH2 4	Peromyscus	infected	N/A	Yes	K	I3	303.5	2.48	4	0
Sample_95	TBO2 1	Peromyscus	infected	N/A	Yes	N	I3	1605.5	3.21	10	1
Sample_96	TBO2 2	Peromyscus	infected	N/A	Yes	N	I3	800	2.9	8	0
Sample_97	TBO2 3	Peromyscus	infected	N/A	Yes	N	I3	1615.5	3.21	11	1
Sample_98	TBO2 4	Peromyscus	infected	N/A	Yes	N	I3	8928.5	3.95	20	1
Sample_99	TBO2 5	Peromyscus	infected	N/A	Yes	N	I3	184	2.26	3	0
Sample_100	WQR 1	Peromyscus	infected	N/A	Yes	T	I3	3410	3.53	15	1
Sample_101	WQR 2	Peromyscus	infected	N/A	Yes	T	I3	5350	3.73	17	1
Sample_102	WQR 3	Peromyscus	infected	N/A	Yes	T	I3	1067	3.03	9	0
Sample_103	WQR 5	Peromyscus	infected	N/A	Yes	T	I3	166.5	2.22	2	0
Sample_104	NAIVE 1	Peromyscus	control	N/A	No	none	I3	1	0	N/A	N/A
Sample_105	NAIVE 2	Peromyscus	control	N/A	No	none	I3	1	0	N/A	N/A
Sample_106	NAIVE 3	Peromyscus	control	N/A	No	none	I3	65.5	1.82	N/A	N/A
Sample_107	NAIVE 4	Peromyscus	control	N/A	No	none	I3	1	0	N/A	N/A
Sample_108	NAIVE 5	Peromyscus	control	N/A	No	none	I3	165.5	2.22	N/A	N/A
Sample_109	NAIVE 6	Peromyscus	control	N/A	No	none	I3	1	0	N/A	N/A
Sample_110	NAIVE 7	Peromyscus	control	N/A	No	none	I3	117.5	2.07	N/A	N/A
Sample_1	902111	Human	infected	Disseminated	Yes	unknown	J	528.5	2.72	23	1
Sample_2	902436	Human	infected	Late	Yes	unknown	J	85.5	1.93	2	0
Sample_3	902622	Human	infected	Disseminated	Yes	unknown	J	767	2.88	28	1
Sample_4	902668	Human	infected	Disseminated	Yes	unknown	J	1522	3.18	40	1
Sample_5	910531	Human	infected	Disseminated	Yes	unknown	J	429	2.63	19	1
Sample_6	910532	Human	infected	Late	Yes	unknown	J	114	2.06	6	0
Sample_7	910533	Human	infected	Late	Yes	unknown	J	206	2.31	12	1
Sample_8	910544	Human	infected	Late	Yes	unknown	J	506.5	2.7	22	1
Sample_9	910794	Human	infected	Late	Yes	unknown	J	3425.5	3.53	46	1
Sample_10	910900	Human	infected	Disseminated	Yes	unknown	J	45633.5	4.66	54	1
Sample_11	910943	Human	infected	Late	Yes	unknown	J	314	2.5	15	1
Sample_12	911104	Human	infected	Disseminated	Yes	unknown	J	3959.5	3.6	47	1
Sample_13	911347	Human	infected	Early	Yes	unknown	J	982.5	2.99	33	1
Sample_14	911348	Human	infected	Early	Yes	unknown	J	47574.5	4.68	55	1
Sample_15	911349	Human	infected	Early	Yes	unknown	J	1120	3.05	34	1
Sample_16	911350	Human	infected	Early	Yes	unknown	J	10510	4.02	51	1
Sample_17	911351	Human	infected	Early	Yes	unknown	J	1497	3.18	39	1
Sample_18	911353	Human	infected	Early	Yes	unknown	J	106	2.03	5	0
Sample_19	911841	Human	infected	Early	Yes	unknown	J	204	2.31	10.5	1
Sample_20	911844	Human	infected	Early	Yes	unknown	J	921.5	2.96	32	1
Sample_21	911847	Human	infected	Early	Yes	unknown	J	4083.5	3.61	48	1
Sample_22	920057	Human	infected	Late	Yes	unknown	J	122	2.09	7	0
Sample_23	921982	Human	infected	Early	Yes	unknown	J	1909	3.28	42	1
Sample_24	930206	Human	infected	Early	Yes	unknown	J	1207.5	3.08	35	1
Sample_25	931414	Human	infected	Early	Yes	unknown	J	1401	3.15	37	1
Sample_26	940357	Human	infected	Disseminated	Yes	unknown	J	623	2.79	25	1
Sample_27	940880	Human	infected	Late	Yes	unknown	J	26276.5	4.42	53	1
Sample_28	Steere 12	Human	infected	Lyme Arthritis	Yes	unknown	J	4808.5	3.68	50	1
Sample_29	Steere 13	Human	infected	Disseminated or Late	Yes	unknown	J	591.5	2.77	24	1
Sample_30	Steere 17	Human	infected	Disseminated or Late	Yes	unknown	J	284.5	2.45	14	1
Sample_31	Steere 18	Human	infected	Lyme Arthritis	Yes	unknown	J	4245.5	3.63	49	1
Sample_32	Steere 20	Human	infected	Lyme Arthritis	Yes	unknown	J	218.5	2.34	13	1
Sample_33	Steere 21	Human	infected	Disseminated or Late	Yes	unknown	J	1271	3.1	36	1
Sample_34	Steere 22	Human	infected	Lyme Arthritis	Yes	unknown	J	103.5	2.01	3	0
Sample_35	Steere 24	Human	infected	Disseminated or Late	Yes	unknown	J	784	2.89	30	1
Sample_36	Steere 25	Human	infected	Lyme Arthritis	Yes	unknown	J	1774	3.25	41	1
Sample_37	Steere 27	Human	infected	Lyme Arthritis	Yes	unknown	J	204	2.31	10.5	1
Sample_38	Steere 3	Human	infected	Lyme Arthritis	Yes	unknown	J	141.5	2.15	9	0
Sample_39	Steere 30	Human	infected	Disseminated or Late	Yes	unknown	J	385.5	2.59	18	1
Sample_40	Steere 31	Human	infected	Lyme Arthritis	Yes	unknown	J	355	2.55	17	1
Sample_41	Steere 33	Human	infected	Disseminated or Late	Yes	unknown	J	806.5	2.91	31	1
Sample_42	Steere 35	Human	infected	Lyme Arthritis	Yes	unknown	J	698	2.84	27	1
Sample_43	Steere 37	Human	infected	Disseminated or Late	Yes	unknown	J	105	2.02	4	0
Sample_44	Steere 39	Human	infected	Lyme Arthritis	Yes	unknown	J	668	2.82	26	1
Sample_45	Steere 41	Human	infected	Lyme Arthritis	Yes	unknown	J	461	2.66	20	1
Sample_46	Steere 42	Human	infected	Disseminated or Late	Yes	unknown	J	1985.5	3.3	43	1
Sample_47	Steere 43	Human	infected	Disseminated or Late	Yes	unknown	J	489.5	2.69	21	1
Sample_48	Steere 46	Human	infected	Lyme Arthritis	Yes	unknown	J	48.5	1.69	1	0
Sample_49	Steere 47	Human	infected	Lyme Arthritis	Yes	unknown	J	137	2.14	8	0
Sample_50	Steere 50	Human	infected	Lyme Arthritis	Yes	unknown	J	783	2.89	29	1
Sample_51	Steere 54	Human	infected	Lyme Arthritis	Yes	unknown	J	22094.5	4.34	52	1
Sample_52	Steere 57	Human	infected	Lyme Arthritis	Yes	unknown	J	2121	3.33	44	1
Sample_53	Steere 58	Human	infected	Disseminated or Late	Yes	unknown	J	3147	3.5	45	1
Sample_54	Steere 6	Human	infected	Lyme Arthritis	Yes	unknown	J	1424.5	3.15	38	1
Sample_55	Steere 8	Human	infected	Lyme Arthritis	Yes	unknown	J	331	2.52	16	1
Sample_56	900874	Human	control	none	No	none	J	121	2.08	N/A	N/A
Sample_57	900875	Human	control	none	No	none	J	117.5	2.07	N/A	N/A
Sample_58	900876	Human	control	none	No	none	J	44	1.64	N/A	N/A
Sample_59	900877	Human	control	none	No	none	J	67.5	1.83	N/A	N/A
Sample_60	900878	Human	control	none	No	none	J	255.5	2.41	N/A	N/A
Sample_61	Steere 10	Human	control	none	No	none	J	254	2.4	N/A	N/A
Sample_62	Steere 11	Human	control	none	No	none	J	67	1.83	N/A	N/A
Sample_63	Steere 14	Human	control	none	No	none	J	37.5	1.57	N/A	N/A
Sample_64	Steere 19	Human	control	none	No	none	J	19.5	1.29	N/A	N/A
Sample_65	Steere 2	Human	control	none	No	none	J	296	2.47	N/A	N/A
Sample_66	Steere 23	Human	control	none	No	none	J	104	2.02	N/A	N/A
Sample_67	Steere 28	Human	control	none	No	none	J	260	2.41	N/A	N/A
Sample_68	Steere 32	Human	control	none	No	none	J	30	1.48	N/A	N/A
Sample_69	Steere 34	Human	control	none	No	none	J	62.5	1.8	N/A	N/A
Sample_70	Steere 36	Human	control	none	No	none	J	31.5	1.5	N/A	N/A
Sample_71	Steere 38	Human	control	none	No	none	J	49	1.69	N/A	N/A
Sample_72	Steere 44	Human	control	none	No	none	J	55.5	1.74	N/A	N/A
Sample_73	Steere 45	Human	control	none	No	none	J	45.5	1.66	N/A	N/A
Sample_74	Steere 49	Human	control	none	No	none	J	221	2.34	N/A	N/A
Sample_75	Steere 5	Human	control	none	No	none	J	49	1.69	N/A	N/A
Sample_76	Steere 52	Human	control	none	No	none	J	160	2.2	N/A	N/A
Sample_77	Steere 53	Human	control	none	No	none	J	120.5	2.08	N/A	N/A
Sample_78	Steere 56	Human	control	none	No	none	J	117.5	2.07	N/A	N/A
Sample_79	Steere 59	Human	control	none	No	none	J	125.5	2.1	N/A	N/A
Sample_80	Steere 60	Human	control	none	No	none	J	293.5	2.47	N/A	N/A
Sample_81	27577 4	Peromyscus	infected	N/A	Yes	F	J	1399	3.15	7	1
Sample_82	27577 5	Peromyscus	infected	N/A	Yes	F	J	1217	3.09	6	1
Sample_83	HB19 1	Peromyscus	infected	N/A	Yes	I	J	14279	4.15	22	1
Sample_84	HB19 2	Peromyscus	infected	N/A	Yes	I	J	1	0	1	0
Sample_85	HB19 3	Peromyscus	infected	N/A	Yes	I	J	1740	3.24	9	1
Sample_86	HB19 4	Peromyscus	infected	N/A	Yes	I	J	4077	3.61	14	1
Sample_87	IDS 1	Peromyscus	infected	N/A	Yes	A and N	J	5279.5	3.72	16	1
Sample_88	IDS 2	Peromyscus	infected	N/A	Yes	A and N	J	3134	3.5	13	1
Sample_89	IDS 3	Peromyscus	infected	N/A	Yes	A and N	J	6159	3.79	18	1
Sample_90	IDS 4	Peromyscus	infected	N/A	Yes	A and N	J	5732	3.76	17	1
Sample_91	IDS 5	Peromyscus	infected	N/A	Yes	A and N	J	2020.5	3.31	10	1
Sample_92	SH2 1	Peromyscus	infected	N/A	Yes	K	J	10169.2	4.01	21	1
Sample_93	SH2 3	Peromyscus	infected	N/A	Yes	K	J	25747	4.41	23	1
Sample_94	SH2 4	Peromyscus	infected	N/A	Yes	K	J	1205	3.08	5	1
Sample_95	TBO2 1	Peromyscus	infected	N/A	Yes	N	J	1498.5	3.18	8	1
Sample_96	TBO2 2	Peromyscus	infected	N/A	Yes	N	J	1131.5	3.05	4	0
Sample_97	TBO2 3	Peromyscus	infected	N/A	Yes	N	J	2681.5	3.43	12	1
Sample_98	TBO2 4	Peromyscus	infected	N/A	Yes	N	J	4835	3.68	15	1
Sample_99	TBO2 5	Peromyscus	infected	N/A	Yes	N	J	1094	3.04	3	0
Sample_100	WQR 1	Peromyscus	infected	N/A	Yes	T	J	7006.5	3.85	19	1
Sample_101	WQR 2	Peromyscus	infected	N/A	Yes	T	J	8704	3.94	20	1
Sample_102	WQR 3	Peromyscus	infected	N/A	Yes	T	J	2155.5	3.33	11	1
Sample_103	WQR 5	Peromyscus	infected	N/A	Yes	T	J	399	2.6	2	0
Sample_104	NAIVE 1	Peromyscus	control	N/A	No	none	J	500.5	2.7	N/A	N/A
Sample_105	NAIVE 2	Peromyscus	control	N/A	No	none	J	1	0	N/A	N/A
Sample_106	NAIVE 3	Peromyscus	control	N/A	No	none	J	315.5	2.5	N/A	N/A
Sample_107	NAIVE 4	Peromyscus	control	N/A	No	none	J	766	2.88	N/A	N/A
Sample_108	NAIVE 5	Peromyscus	control	N/A	No	none	J	585	2.77	N/A	N/A
Sample_109	NAIVE 6	Peromyscus	control	N/A	No	none	J	241	2.38	N/A	N/A
Sample_110	NAIVE 7	Peromyscus	control	N/A	No	none	J	246.5	2.39	N/A	N/A
Sample_1	902111	Human	infected	Disseminated	Yes	unknown	K	823.5	2.92	42	1
Sample_2	902436	Human	infected	Late	Yes	unknown	K	64.5	1.81	8	0
Sample_3	902622	Human	infected	Disseminated	Yes	unknown	K	175	2.24	16	1
Sample_4	902668	Human	infected	Disseminated	Yes	unknown	K	331.5	2.52	25	1
Sample_5	910531	Human	infected	Disseminated	Yes	unknown	K	696	2.84	41	1
Sample_6	910532	Human	infected	Late	Yes	unknown	K	173.5	2.24	15	0
Sample_7	910533	Human	infected	Late	Yes	unknown	K	95.5	1.98	11	0
Sample_8	910544	Human	infected	Late	Yes	unknown	K	388.5	2.59	29	1
Sample_9	910794	Human	infected	Late	Yes	unknown	K	572	2.76	39	1
Sample_10	910900	Human	infected	Disseminated	Yes	unknown	K	31466.5	4.5	55	1
Sample_11	910943	Human	infected	Late	Yes	unknown	K	89.5	1.95	9	0
Sample_12	911104	Human	infected	Disseminated	Yes	unknown	K	892	2.95	44	1
Sample_13	911347	Human	infected	Early	Yes	unknown	K	1313	3.12	48	1
Sample_14	911348	Human	infected	Early	Yes	unknown	K	20297.5	4.31	54	1
Sample_15	911349	Human	infected	Early	Yes	unknown	K	418.5	2.62	31	1
Sample_16	911350	Human	infected	Early	Yes	unknown	K	3740	3.57	49	1
Sample_17	911351	Human	infected	Early	Yes	unknown	K	862.5	2.94	43	1
Sample_18	911353	Human	infected	Early	Yes	unknown	K	48.5	1.69	5	0
Sample_19	911841	Human	infected	Early	Yes	unknown	K	299	2.48	22	1
Sample_20	911844	Human	infected	Early	Yes	unknown	K	207	2.32	19	1
Sample_21	911847	Human	infected	Early	Yes	unknown	K	436	2.64	33	1
Sample_22	920057	Human	infected	Late	Yes	unknown	K	43.5	1.64	3	0
Sample_23	921982	Human	infected	Early	Yes	unknown	K	364.5	2.56	28	1
Sample_24	930206	Human	infected	Early	Yes	unknown	K	435.5	2.64	32	1
Sample_25	931414	Human	infected	Early	Yes	unknown	K	302	2.48	23	1
Sample_26	940357	Human	infected	Disseminated	Yes	unknown	K	530	2.72	37	1
Sample_27	940880	Human	infected	Late	Yes	unknown	K	12834.5	4.11	53	1
Sample_28	Steere 12	Human	infected	Lyme Arthritis	Yes	unknown	K	404.5	2.61	30	1
Sample_29	Steere 13	Human	infected	Disseminated or Late	Yes	unknown	K	61	1.79	7	0
Sample_30	Steere 17	Human	infected	Disseminated or Late	Yes	unknown	K	45.5	1.66	4	0
Sample_31	Steere 18	Human	infected	Lyme Arthritis	Yes	unknown	K	4703.5	3.67	51	1
Sample_32	Steere 20	Human	infected	Lyme Arthritis	Yes	unknown	K	123	2.09	13	0
Sample_33	Steere 21	Human	infected	Disseminated or Late	Yes	unknown	K	251	2.4	20	1
Sample_34	Steere 22	Human	infected	Lyme Arthritis	Yes	unknown	K	54	1.73	6	0
Sample_35	Steere 24	Human	infected	Disseminated or Late	Yes	unknown	K	446	2.65	34	1
Sample_36	Steere 25	Human	infected	Lyme Arthritis	Yes	unknown	K	446.5	2.65	35	1
Sample_37	Steere 27	Human	infected	Lyme Arthritis	Yes	unknown	K	514.5	2.71	36	1
Sample_38	Steere 3	Human	infected	Lyme Arthritis	Yes	unknown	K	41.5	1.62	2	0
Sample_39	Steere 30	Human	infected	Disseminated or Late	Yes	unknown	K	311	2.49	24	1
Sample_40	Steere 31	Human	infected	Lyme Arthritis	Yes	unknown	K	97	1.99	12	0
Sample_41	Steere 33	Human	infected	Disseminated or Late	Yes	unknown	K	355.5	2.55	27	1
Sample_42	Steere 35	Human	infected	Lyme Arthritis	Yes	unknown	K	662.5	2.82	40	1
Sample_43	Steere 37	Human	infected	Disseminated or Late	Yes	unknown	K	94	1.97	10	0
Sample_44	Steere 39	Human	infected	Lyme Arthritis	Yes	unknown	K	167.5	2.22	14	0
Sample_45	Steere 41	Human	infected	Lyme Arthritis	Yes	unknown	K	202.5	2.31	18	1
Sample_46	Steere 42	Human	infected	Disseminated or Late	Yes	unknown	K	912	2.96	45	1
Sample_47	Steere 43	Human	infected	Disseminated or Late	Yes	unknown	K	197	2.29	17	1
Sample_48	Steere 46	Human	infected	Lyme Arthritis	Yes	unknown	K	40.5	1.61	1	0
Sample_49	Steere 47	Human	infected	Lyme Arthritis	Yes	unknown	K	1085	3.04	46	1
Sample_50	Steere 50	Human	infected	Lyme Arthritis	Yes	unknown	K	288	2.46	21	1
Sample_51	Steere 54	Human	infected	Lyme Arthritis	Yes	unknown	K	10149.5	4.01	52	1
Sample_52	Steere 57	Human	infected	Lyme Arthritis	Yes	unknown	K	4550.5	3.66	50	1
Sample_53	Steere 58	Human	infected	Disseminated or Late	Yes	unknown	K	555.5	2.74	38	1
Sample_54	Steere 6	Human	infected	Lyme Arthritis	Yes	unknown	K	340	2.53	26	1
Sample_55	Steere 8	Human	infected	Lyme Arthritis	Yes	unknown	K	1104.5	3.04	47	1
Sample_56	900874	Human	control	none	No	none	K	78	1.89	N/A	N/A
Sample_57	900875	Human	control	none	No	none	K	104	2.02	N/A	N/A
Sample_58	900876	Human	control	none	No	none	K	21.5	1.33	N/A	N/A
Sample_59	900877	Human	control	none	No	none	K	88	1.94	N/A	N/A
Sample_60	900878	Human	control	none	No	none	K	218.5	2.34	N/A	N/A
Sample_61	Steere 10	Human	control	none	No	none	K	80	1.9	N/A	N/A
Sample_62	Steere 11	Human	control	none	No	none	K	101.5	2.01	N/A	N/A
Sample_63	Steere 14	Human	control	none	No	none	K	17	1.23	N/A	N/A
Sample_64	Steere 19	Human	control	none	No	none	K	5	0.7	N/A	N/A
Sample_65	Steere 2	Human	control	none	No	none	K	57.5	1.76	N/A	N/A
Sample_66	Steere 23	Human	control	none	No	none	K	114	2.06	N/A	N/A
Sample_67	Steere 28	Human	control	none	No	none	K	39.5	1.6	N/A	N/A
Sample_68	Steere 32	Human	control	none	No	none	K	31.5	1.5	N/A	N/A
Sample_69	Steere 34	Human	control	none	No	none	K	34.5	1.54	N/A	N/A
Sample_70	Steere 36	Human	control	none	No	none	K	43	1.63	N/A	N/A
Sample_71	Steere 38	Human	control	none	No	none	K	53.5	1.73	N/A	N/A
Sample_72	Steere 44	Human	control	none	No	none	K	19	1.28	N/A	N/A
Sample_73	Steere 45	Human	control	none	No	none	K	17	1.23	N/A	N/A
Sample_74	Steere 49	Human	control	none	No	none	K	99.5	2	N/A	N/A
Sample_75	Steere 5	Human	control	none	No	none	K	19	1.28	N/A	N/A
Sample_76	Steere 52	Human	control	none	No	none	K	54	1.73	N/A	N/A
Sample_77	Steere 53	Human	control	none	No	none	K	28.5	1.45	N/A	N/A
Sample_78	Steere 56	Human	control	none	No	none	K	16	1.2	N/A	N/A
Sample_79	Steere 59	Human	control	none	No	none	K	82	1.91	N/A	N/A
Sample_80	Steere 60	Human	control	none	No	none	K	171	2.23	N/A	N/A
Sample_81	27577 4	Peromyscus	infected	N/A	Yes	F	K	408	2.61	3.5	0
Sample_82	27577 5	Peromyscus	infected	N/A	Yes	F	K	408	2.61	3.5	0
Sample_83	HB19 1	Peromyscus	infected	N/A	Yes	I	K	7911	3.9	22	1
Sample_84	HB19 2	Peromyscus	infected	N/A	Yes	I	K	2148	3.33	15	1
Sample_85	HB19 3	Peromyscus	infected	N/A	Yes	I	K	2826.5	3.45	19	1
Sample_86	HB19 4	Peromyscus	infected	N/A	Yes	I	K	1679	3.23	13	1
Sample_87	IDS 1	Peromyscus	infected	N/A	Yes	A and N	K	1386.5	3.14	11	1
Sample_88	IDS 2	Peromyscus	infected	N/A	Yes	A and N	K	3950.5	3.6	21	1
Sample_89	IDS 3	Peromyscus	infected	N/A	Yes	A and N	K	2697	3.43	17	1
Sample_90	IDS 4	Peromyscus	infected	N/A	Yes	A and N	K	1136	3.06	10	1
Sample_91	IDS 5	Peromyscus	infected	N/A	Yes	A and N	K	462.5	2.67	6	0
Sample_92	SH2 1	Peromyscus	infected	N/A	Yes	K	K	3049.25	3.48	20	1
Sample_93	SH2 3	Peromyscus	infected	N/A	Yes	K	K	13699	4.14	23	1
Sample_94	SH2 4	Peromyscus	infected	N/A	Yes	K	K	2719	3.43	18	1
Sample_95	TBO2 1	Peromyscus	infected	N/A	Yes	N	K	427	2.63	5	0
Sample_96	TBO2 2	Peromyscus	infected	N/A	Yes	N	K	296.5	2.47	2	0
Sample_97	TBO2 3	Peromyscus	infected	N/A	Yes	N	K	1028.5	3.01	9	0
Sample_98	TBO2 4	Peromyscus	infected	N/A	Yes	N	K	1463	3.17	12	1
Sample_99	TBO2 5	Peromyscus	infected	N/A	Yes	N	K	547.5	2.74	7	0
Sample_100	WQR 1	Peromyscus	infected	N/A	Yes	T	K	2378.5	3.38	16	1
Sample_101	WQR 2	Peromyscus	infected	N/A	Yes	T	K	2098	3.32	14	1
Sample_102	WQR 3	Peromyscus	infected	N/A	Yes	T	K	955.5	2.98	8	0
Sample_103	WQR 5	Peromyscus	infected	N/A	Yes	T	K	252	2.4	1	0
Sample_104	NAIVE 1	Peromyscus	control	N/A	No	none	K	206.5	2.31	N/A	N/A
Sample_105	NAIVE 2	Peromyscus	control	N/A	No	none	K	1	0	N/A	N/A
Sample_106	NAIVE 3	Peromyscus	control	N/A	No	none	K	70	1.85	N/A	N/A
Sample_107	NAIVE 4	Peromyscus	control	N/A	No	none	K	188.5	2.28	N/A	N/A
Sample_108	NAIVE 5	Peromyscus	control	N/A	No	none	K	135.5	2.13	N/A	N/A
Sample_109	NAIVE 6	Peromyscus	control	N/A	No	none	K	44.5	1.65	N/A	N/A
Sample_110	NAIVE 7	Peromyscus	control	N/A	No	none	K	110.5	2.04	N/A	N/A
Sample_1	902111	Human	infected	Disseminated	Yes	unknown	L	98.5	1.99	26	0
Sample_2	902436	Human	infected	Late	Yes	unknown	L	799.5	2.9	46	1
Sample_3	902622	Human	infected	Disseminated	Yes	unknown	L	944.5	2.98	50	1
Sample_4	902668	Human	infected	Disseminated	Yes	unknown	L	106.5	2.03	27	0
Sample_5	910531	Human	infected	Disseminated	Yes	unknown	L	119.5	2.08	30	0
Sample_6	910532	Human	infected	Late	Yes	unknown	L	40	1.6	12	0
Sample_7	910533	Human	infected	Late	Yes	unknown	L	43.5	1.64	17	0
Sample_8	910544	Human	infected	Late	Yes	unknown	L	414	2.62	43	1
Sample_9	910794	Human	infected	Late	Yes	unknown	L	75	1.88	25	0
Sample_10	910900	Human	infected	Disseminated	Yes	unknown	L	7161	3.85	52	1
Sample_11	910943	Human	infected	Late	Yes	unknown	L	62	1.79	20	0
Sample_12	911104	Human	infected	Disseminated	Yes	unknown	L	282.5	2.45	41	1
Sample_13	911347	Human	infected	Early	Yes	unknown	L	42.5	1.63	15.5	0
Sample_14	911348	Human	infected	Early	Yes	unknown	L	11571	4.06	55	1
Sample_15	911349	Human	infected	Early	Yes	unknown	L	236.5	2.37	37	1
Sample_16	911350	Human	infected	Early	Yes	unknown	L	116	2.06	28	0
Sample_17	911351	Human	infected	Early	Yes	unknown	L	883.5	2.95	49	1
Sample_18	911353	Human	infected	Early	Yes	unknown	L	41	1.61	13	0
Sample_19	911841	Human	infected	Early	Yes	unknown	L	8	0.9	2	0
[truncated: 531 more rows]
