# Supplementary material for: Inferring Epitopes of a Polymorphic Antigen Amidst Broadly Cross-Reactive Antibodies Using Protein Microarrays: A Study of OspC Proteins of Borrelia burgdorferi
Source: PLoS One. 2013 Jun 24;8(6):e67445. doi: 10.1371/journal.pone.0067445 (PMC3691210; doi:10.1371/journal.pone.0067445)
Supplement: Table S5 — Pairwise global amino acid sequence identity matrix between 23 OspC proteins ( MS-Global ), in percentage. (XLS) [file pone.0067445.s009.xls]

## Sheet: Sheet1
OspC Type	A	A3	B	C	C3	D	D3	E	E3	F	F3	G	H	H3	I	I3	J	K	L	M	N	T	U
A	100	71.2	75.8	78.5	75.7	74	70.4	69.3	75.1	71.6	77.4	69.7	71.2	69.5	75.1	79.6	72.3	74.6	68.9	73.7	70.4	71.5	76.1
A3	71.2	100	68.4	72.7	72.3	72.9	67.8	69.9	70.1	76.1	71.8	70.1	76.1	73.5	69.3	75.6	74	71.2	75.6	73.5	67.8	76	69.8
B	75.8	68.4	100	79.7	73	71.4	72.6	66.3	76.4	71.9	68	65.4	68.4	68	74	73	68.5	74.2	67.2	67.8	73.2	66.1	69.1
C	78.5	72.7	79.7	100	78	68.4	72.5	69.5	74.6	74	73.5	65.2	73.3	69.7	81.8	78	74.6	76.3	70.5	73.2	71.9	71	73.3
C3	75.7	72.3	73	78	100	70.1	70.4	70.6	74	70.6	70.1	69.3	72.3	72.5	74.6	73.5	74	74.6	72.3	77	71.5	71.5	76.1
D	74	72.9	71.4	68.4	70.1	100	68.2	67.2	71.8	71.2	79.1	71.5	70.6	69.7	74	70.6	70.6	71.8	68.9	71	68.7	73.7	68.9
D3	70.4	67.8	72.6	72.5	70.4	68.2	100	68	73.2	68	65.9	66.7	65.2	69.8	68	70.8	68.7	69.8	65.2	72.9	86.4	69.3	67.4
E	69.3	69.9	66.3	69.5	70.6	67.2	68	100	70.6	68.6	65.5	65.5	70.1	74.4	68.4	68.6	72.3	74	62.7	73	69.7	71.5	68.7
E3	75.1	70.1	76.4	74.6	74	71.8	73.2	70.6	100	72.9	69.5	68.7	69.5	71.9	74.6	75.1	75.1	77.4	70.6	73	73.2	71.5	71.1
F	71.6	76.1	71.9	74	70.6	71.2	68	68.6	72.9	100	74.6	70.6	78	70.5	68.9	90.3	75.7	72.9	70.6	73.6	70.2	77.1	69.3
F3	77.4	71.8	68	73.5	70.1	79.1	65.9	65.5	69.5	74.6	100	65.9	76.8	66.9	78	70.6	72.9	71.2	69.5	68.7	64.8	73.2	68.3
G	69.7	70.1	65.4	65.2	69.3	71.5	66.7	65.5	68.7	70.6	65.9	100	67.4	65.7	64	66.7	67.6	67.6	66.9	71.8	72.3	71	65.8
H	71.2	76.1	68.4	73.3	72.3	70.6	65.2	70.1	69.5	78	76.8	67.4	100	69.7	69.9	74	84.2	71.2	76.7	70.4	66.9	75.4	69.4
H3	69.5	73.5	68	69.7	72.5	69.7	69.8	74.4	71.9	70.5	66.9	65.7	69.7	100	69.1	71	73	71.4	65.2	79.3	71	72.2	69.4
I	75.1	69.3	74	81.8	74.6	74	68	68.4	74.6	68.9	78	64	69.9	69.1	100	72.3	70.6	73.5	69.9	70.4	67.4	69.3	68.3
I3	79.6	75.6	73	78	73.5	70.6	70.8	68.6	75.1	90.3	70.6	66.7	74	71	72.3	100	75.7	75.1	71.2	74.7	70.2	74.3	74.3
J	72.3	74	68.5	74.6	74	70.6	68.7	72.3	75.1	75.7	72.9	67.6	84.2	73	70.6	75.7	100	75.1	73.5	72.6	67.6	71.5	71.7
K	74.6	71.2	74.2	76.3	74.6	71.8	69.8	74	77.4	72.9	71.2	67.6	71.2	71.4	73.5	75.1	75.1	100	66.7	73.7	74.3	73.7	75
L	68.9	75.6	67.2	70.5	72.3	68.9	65.2	62.7	70.6	70.6	69.5	66.9	76.7	65.2	69.9	71.2	73.5	66.7	100	65.2	64	69.8	66.1
M	73.7	73.5	67.8	73.2	77	71	72.9	73	73	73.6	68.7	71.8	70.4	79.3	70.4	74.7	72.6	73.7	65.2	100	73.5	75.3	73.5
N	70.4	67.8	73.2	71.9	71.5	68.7	86.4	69.7	73.2	70.2	64.8	72.3	66.9	71	67.4	70.2	67.6	74.3	64	73.5	100	70.4	69.1
T	71.5	76	66.1	71	71.5	73.7	69.3	71.5	71.5	77.1	73.2	71	75.4	72.2	69.3	74.3	71.5	73.7	69.8	75.3	70.4	100	69.2
U	76.1	69.8	69.1	73.3	76.1	68.9	67.4	68.7	71.1	69.3	68.3	65.8	69.4	69.4	68.3	74.3	71.7	75	66.1	73.5	69.1	69.2	100
